# Supplementary material for: Comparative study of metal–organic frameworks synthesized via imide condensation and coordination assembly
Source: Royal Society of Chemistry journal article supplement (doi:10.1039/d4ra05563b), 2024-01-01
Supplement: d4ra05563b1.pdf [file d4ra05563b1.pdf]

## Supporting Information

# Comparative Study of Metal-Organic Frameworks Synthesized via Imide Condensation and Coordination Assembly

Qiao Liu, Jordon S. Hilliard, Zhongzheng Cai, and Casey R. Wade\*

*Department of Chemistry and Biochemistry, The Ohio State University, Columbus, OH 43210, United States*

\* E-mail: [wade.521@osu.edu](mailto:wade.521@osu.edu)

### Table of Contents:

|                                                                                                                                                             |    |
|-------------------------------------------------------------------------------------------------------------------------------------------------------------|----|
| <b>Table S1.</b> Summary of MCOFs synthesized by connecting metal organic clusters.....                                                                     | 4  |
| <b>Table S2.</b> Comparison of surface area between reported porous polyimides and <b>1-XDI</b> MOFs.....                                                   | 5  |
| Part 1: Characterization data for <b>1-NH<sub>2</sub></b> and <b>1-XDI</b> MOFs .....                                                                       | 6  |
| <b>Figure S1.</b> Simulated and experimental ESI-MS spectrum of <b>1-NH<sub>2</sub></b> .....                                                               | 6  |
| <b>Table S3.</b> Assignment of ions observed in the ESI-MS spectrum shown in Figure S1.....                                                                 | 7  |
| <b>Figure S2.</b> <sup>1</sup> H NMR spectra of (a) Hbt-NH <sub>2</sub> and (b) <b>1-NH<sub>2</sub></b> . .....                                             | 8  |
| <b>Figure S3.</b> Some possible isomers of <b>1-NH<sub>2</sub></b> . .....                                                                                  | 9  |
| <b>Figure S4.</b> Thermogravimetric analysis data for dried <b>1-NH<sub>2</sub></b> . .....                                                                 | 10 |
| <b>Figure S5.</b> PXRD patterns measured for multiple batches of <b>1-PMDI</b> .....                                                                        | 11 |
| <b>Figure S6.</b> Acid-digested <sup>1</sup> H NMR spectrum and TGA data for as-synthesized <b>1-PMDI</b> .....                                             | 12 |
| <b>Figure S7.</b> Acid-digested <sup>1</sup> H NMR spectrum and TGA data for as-synthesized <b>1-NDI</b> .....                                              | 13 |
| <b>Figure S8.</b> Acid-digested <sup>1</sup> H NMR spectrum and TGA data for as-synthesized <b>1-BPDI</b> . ....                                            | 14 |
| <b>Figure S9.</b> Acid-digested <sup>1</sup> H NMR spectrum and TGA data for as-synthesized <b>1-HFIPI</b> .....                                            | 15 |
| <b>Figure S10.</b> Acid-digested <sup>1</sup> H NMR spectrum of activated <b>1-PMDI</b> .....                                                               | 16 |
| <b>Figure S11.</b> Acid-digested <sup>1</sup> H NMR spectrum of activated <b>1-NDI</b> . .....                                                              | 17 |
| <b>Figure S12.</b> Acid-digested <sup>1</sup> H NMR spectrum of activated <b>1-BPDI</b> . .....                                                             | 18 |
| <b>Figure S13.</b> Acid-digested <sup>1</sup> H NMR spectrum of activated <b>1-HFIPI</b> .....                                                              | 19 |
| <b>Figure S14.</b> N <sub>2</sub> adsorption isotherms (77 K) and calculated BET surface areas measured for multiple batches of the <b>1-XDI</b> MOFs. .... | 20 |
| <b>Figure S15.</b> DFT pore size distributions of <b>1-XDI</b> MOFs. ....                                                                                   | 21 |
| <b>Elemental analysis and ICP-OES results:</b> .....                                                                                                        | 22 |
| <b>Table S4.</b> Elemental analysis and ICP results for <b>1-PMDI</b> .....                                                                                 | 22 |
| <b>Table S5.</b> Elemental analysis and ICP results for <b>1-BPDI</b> .....                                                                                 | 22 |
| <b>Table S6.</b> Elemental analysis and ICP results for <b>1-NDI</b> . ....                                                                                 | 22 |

|                                                                                                                                                                                                                                                                           |    |
|---------------------------------------------------------------------------------------------------------------------------------------------------------------------------------------------------------------------------------------------------------------------------|----|
| <b>Table S7.</b> Elemental analysis and ICP results for <b>1-HFIPI</b> .                                                                                                                                                                                                  | 23 |
| <b>Table S8.</b> Elemental analysis and ICP results for <b>2-PMDI</b> .                                                                                                                                                                                                   | 23 |
| <b>Table S9.</b> Elemental analysis and ICP results for <b>2-BPDI</b> .                                                                                                                                                                                                   | 23 |
| <b>Table S10.</b> Elemental analysis and ICP results for <b>2-NDI</b> .                                                                                                                                                                                                   | 24 |
| <b>Table S11.</b> Elemental analysis and ICP results for <b>2-HFIPI</b> .                                                                                                                                                                                                 | 24 |
| Part 2: <sup>1</sup> H NMR and ATR-IR spectra of H <sub>2</sub> bbt-XDI linkers                                                                                                                                                                                           | 25 |
| <b>Figure S16.</b> <sup>1</sup> H NMR spectrum of H <sub>2</sub> bbt-PMDI.                                                                                                                                                                                                | 25 |
| <b>Figure S17.</b> <sup>1</sup> H NMR spectrum of H <sub>2</sub> bbt-NDI.                                                                                                                                                                                                 | 26 |
| <b>Figure S18.</b> <sup>1</sup> H NMR spectrum of H <sub>2</sub> bbt-BPDI.                                                                                                                                                                                                | 27 |
| <b>Figure S19.</b> <sup>1</sup> H NMR and <sup>19</sup> F NMR spectra of H <sub>2</sub> bbt-HFIPI.                                                                                                                                                                        | 28 |
| <b>Figure S20.</b> ATR-IR spectra of H <sub>2</sub> bbt-XDI linkers (XDI = NDI, HFIPI, BPDI, PMDI). IR bands associated with the imide groups are highlighted in blue and the C=O stretching mode (1732 cm <sup>-1</sup> ) of residual DMF solvent is highlighted in red. | 29 |
| Part 3: Characterization data for 2-XDI MOFs                                                                                                                                                                                                                              | 30 |
| <b>Figure S21.</b> Overlay of the PXRD patterns of solid products obtained from <b>2-PMDI-n</b> solvothermal screening reactions.                                                                                                                                         | 30 |
| <b>Figure S22.</b> Overlay of the PXRD patterns of solid products obtained from <b>2-BPDI-n</b> solvothermal screening reactions.                                                                                                                                         | 31 |
| <b>Figure S23.</b> Overlay of the PXRD patterns of solid products obtained from <b>2-NDI-n</b> solvothermal screening reactions.                                                                                                                                          | 32 |
| <b>Figure S24.</b> Overlay of the PXRD patterns of solid products obtained from <b>2-HFIPI-n</b> solvothermal screening reactions.                                                                                                                                        | 33 |
| <b>Figure S25.</b> Thermogravimetric analysis data for activated <b>2-PMDI</b> .                                                                                                                                                                                          | 34 |
| <b>Figure S26.</b> Thermogravimetric analysis data for activated <b>2-NDI</b> .                                                                                                                                                                                           | 35 |
| <b>Figure S27.</b> Thermogravimetric analysis data for activated <b>2-BPDI</b> .                                                                                                                                                                                          | 36 |
| <b>Figure S28.</b> Thermogravimetric analysis data for activated <b>2-HFIPI</b> .                                                                                                                                                                                         | 37 |
| <b>Figure S29.</b> DFT pore size distributions for the <b>2-XDI</b> MOFs.                                                                                                                                                                                                 | 38 |
| <b>Figure S30.</b> Acid-digested <sup>1</sup> H NMR spectrum of <b>2-PMDI</b> .                                                                                                                                                                                           | 39 |
| <b>Figure S31.</b> Acid-digested <sup>1</sup> H NMR spectrum of <b>2-BPDI</b> .                                                                                                                                                                                           | 40 |
| <b>Figure S32.</b> Acid-digested <sup>1</sup> H NMR spectrum of <b>2-NDI</b> .                                                                                                                                                                                            | 41 |
| <b>Figure S33.</b> Acid-digested <sup>1</sup> H NMR spectrum of <b>2-HFIPI</b> .                                                                                                                                                                                          | 42 |
| <b>Figure S34.</b> ATR-IR spectra of <b>2-XDI</b> MOFs.                                                                                                                                                                                                                   | 43 |
| Part 4: Attempted structural characterization of crystalline 1-PMDI and 2-XDI samples.                                                                                                                                                                                    | 44 |
| <b>Figure S35.</b> Overlay of PXRD patterns measured for <b>1-PMDI</b> , <b>2-PMDI</b> , and <b>2-BPDI</b> .                                                                                                                                                              | 44 |
| <b>Figure S36.</b> Possible linker conformations and estimated Zn...Zn distances for <b>2-PMDI</b> and <b>2-BPDI</b> MOFs.                                                                                                                                                | 45 |
| <b>Figure S37.</b> TEM image (left) and electron diffraction images (right) of selected crystals of (a) <b>1-PMDI</b> , (b) <b>2-PMDI</b> and (c) <b>2-BPDI</b> MOFs and with improved sample preparation.                                                                | 46 |
| Part 5: Gas adsorption data and binary gas mixture selectivity for 1-XDI and 2-XDI MOFs.                                                                                                                                                                                  | 47 |

|                                                                                                                                                                                                                                                                                                   |    |
|---------------------------------------------------------------------------------------------------------------------------------------------------------------------------------------------------------------------------------------------------------------------------------------------------|----|
| <b>Table S13.</b> Predicted IAST selectivity for binary equimolar gas mixtures (1 bar, 300 K) for the <b>1-XDI</b> MOFs.....                                                                                                                                                                      | 47 |
| <b>Table S14.</b> Predicted IAST selectivity for binary equimolar gas mixtures (1 bar, 300 K) for the <b>2-XDI</b> MOFs.....                                                                                                                                                                      | 47 |
| <b>Table S15.</b> Adsorption capacities (mmol/g) at 1 bar for C <sub>1</sub> -C <sub>3</sub> gases in <b>1-XDI</b> MOFs. <sup>a</sup> .....                                                                                                                                                       | 47 |
| <b>Table S16.</b> Adsorption capacities (mmol/g) at 1 bar for C <sub>1</sub> -C <sub>3</sub> gases in <b>2-XDI</b> MOFs. <sup>a</sup> .....                                                                                                                                                       | 47 |
| <b>Table S17.</b> Summary of gas adsorption properties and C <sub>3</sub> H <sub>6</sub> /C <sub>3</sub> H <sub>8</sub> selectivity of some reported MOFs.....                                                                                                                                    | 48 |
| <b>Table S18.</b> Summary of gas adsorption properties and C <sub>2</sub> H <sub>2</sub> /CO <sub>2</sub> selectivity of some reported MOFs.....                                                                                                                                                  | 49 |
| <b>Figure S38.</b> Overlays of the CO <sub>2</sub> , C <sub>2</sub> H <sub>2</sub> , C <sub>2</sub> H <sub>4</sub> , C <sub>2</sub> H <sub>6</sub> , C <sub>3</sub> H <sub>6</sub> , and C <sub>3</sub> H <sub>8</sub> adsorption isotherms measured for <b>1-XDI</b> materials at 300 K.....     | 50 |
| <b>Figure S39.</b> Overlays of the CO <sub>2</sub> , C <sub>2</sub> H <sub>2</sub> , C <sub>2</sub> H <sub>4</sub> , C <sub>2</sub> H <sub>6</sub> , C <sub>3</sub> H <sub>6</sub> , and C <sub>3</sub> H <sub>8</sub> adsorption isotherms measured for the <b>2-XDI</b> materials at 300 K..... | 51 |
| <b>Figure S40.</b> Variable temperature CO <sub>2</sub> adsorption isotherms and isosteric heat of adsorption for <b>1-NDI</b> .....                                                                                                                                                              | 52 |
| <b>Figure S41.</b> Variable temperature CO <sub>2</sub> adsorption isotherms and isosteric heat of adsorption for <b>1-NDI</b> .....                                                                                                                                                              | 53 |
| <b>Figure S42.</b> Variable temperature CO <sub>2</sub> adsorption isotherms and isosteric heat of adsorption for <b>1-BPDI</b> .....                                                                                                                                                             | 54 |
| <b>Figure S43.</b> Variable temperature CO <sub>2</sub> adsorption isotherms and isosteric heat of adsorption for <b>1-BPDI</b> .....                                                                                                                                                             | 55 |
| <b>Figure S44.</b> Variable temperature CO <sub>2</sub> adsorption isotherms and isosteric heat of adsorption for <b>1-HFIPI</b> .....                                                                                                                                                            | 56 |
| <b>Figure S45.</b> Variable temperature CO <sub>2</sub> adsorption isotherms and isosteric heat of adsorption for <b>1-HFIPI</b> .....                                                                                                                                                            | 57 |

**Table S1.** Summary of MCOFs synthesized by connecting metal organic clusters.

| MCOF                                                                               | Metal Organic Cluster                                                                     | Linkage type | BET Surface area (m <sup>2</sup> /g) | Reference |
|------------------------------------------------------------------------------------|-------------------------------------------------------------------------------------------|--------------|--------------------------------------|-----------|
| <b>1-PMDI</b> (This work)                                                          | Zn <sub>5</sub> (bt-NH <sub>2</sub> ) <sub>3</sub> Cl <sub>4</sub>                        | Imide        | 30                                   | -         |
| <b>1-NDI</b> (This work)                                                           | Zn <sub>5</sub> (bt-NH <sub>2</sub> ) <sub>3</sub> Cl <sub>4</sub>                        |              | 408                                  | -         |
| <b>1-BPDI</b> (This work)                                                          | Zn <sub>5</sub> (bt-NH <sub>2</sub> ) <sub>3</sub> Cl <sub>4</sub>                        |              | 447                                  | -         |
| <b>1-HFIPI</b> (This work)                                                         | Zn <sub>5</sub> (bt-NH <sub>2</sub> ) <sub>3</sub> Cl <sub>4</sub>                        |              | 483                                  | -         |
| JNM-1                                                                              | Cu(I) <sub>3</sub> (PyCA) <sub>3</sub> [a]                                                | Imine        | 535                                  | 1         |
| JNM-2                                                                              | Cu(I) <sub>3</sub> (PyCA) <sub>3</sub> [a]                                                |              | 505                                  | 1         |
| FDM-71                                                                             | Cu(I) <sub>3</sub> (PyCA) <sub>3</sub> [a]                                                |              | 1135                                 | 2         |
| JNM-3-AA                                                                           | Cu(I) <sub>3</sub> (PyCA) <sub>3</sub> [a]                                                |              | 696                                  | 3         |
| Ti-COF-1                                                                           | Na <sub>2</sub> Ti(2,3-DHTA) <sub>3</sub> [b]                                             |              | 1000                                 | 4         |
| MOF-901                                                                            | [Ti <sub>6</sub> O <sub>6</sub> (OiPr) <sub>6</sub> (AB) <sub>6</sub> ] [c]               |              | 550                                  | 5         |
| CCF-1-SE                                                                           | [Cr <sub>3</sub> (μ <sub>3</sub> -O)(RCO <sub>2</sub> ) <sub>6</sub> ]NO <sub>3</sub> [d] |              | 301                                  | 6         |
| Ni-Py-COF                                                                          | Ni(dbpag) <sub>2</sub> [e]                                                                |              | 1051                                 | 7         |
| Ni-Bn-COF                                                                          | Ni(dbpag) <sub>2</sub> [e]                                                                |              | 1240                                 | 7         |
| RuCOF-ETTA                                                                         | Ru(bpy) <sub>3</sub> <sup>2+</sup> [f]                                                    |              | 124                                  | 8         |
| RuCOF-TPB                                                                          | Ru(bpy) <sub>3</sub> <sup>2+</sup> [f]                                                    |              | 149                                  | 8         |
| RuCOF-ETTBA                                                                        | Ru(bpy) <sub>3</sub> <sup>2+</sup> [f]                                                    |              | 235                                  | 8         |
| [Zn <sub>4</sub> (dipp) <sub>4</sub> (L <sub>1</sub> ) <sub>2</sub> ] <sub>n</sub> | [Zn(dipp)(4-Py-CHO)] <sub>4</sub> [g]                                                     |              | 124                                  | 9         |

[a] PyCA = pyrazolate-4-carboxaldehyde

[b] 2,3-DHTA = 2,3-dihydroxyterephthalaldehyde

[c] AB = 4-aminobenzoate; OiPr = isopropoxide

[d] R = 4-aminophenyl

[e] Hdbpag = 1,2-bis(4'-amino-[1,1'-biphenyl]-4-yl)ethane-1,2-dione

[f] bpy = bipyridine

[g] dipp = diiminopyridine

**Table S2.** Comparison of surface area between reported porous polyimides and **1-XDI** MOFs.

| <b>Porous polyimides</b> | <b>Surface area (m<sup>2</sup>/g)</b> | <b>Reference</b> |
|--------------------------|---------------------------------------|------------------|
| sPI-A-H                  | 25                                    | 10               |
| sPI-M-H                  | 492                                   |                  |
| sPI-A-B                  | 620                                   |                  |
| sPI-M-B                  | 618                                   |                  |
| NPI-1                    | 721                                   | 11               |
| NPI-2                    | 291                                   |                  |
| NPI-3                    | 373                                   |                  |
| MPI-1                    | 1454                                  | 12               |
| MPI-2                    | 814                                   |                  |
| MPI-3                    | 586                                   |                  |
| PPI-1                    | 18                                    | 13               |
| PPI-2                    | 604                                   |                  |
| PPI-3                    | 717                                   |                  |
| PI1                      | 660                                   | 14               |
| PI2                      | 265                                   |                  |
| PI3                      | 366                                   |                  |
| <b>1-PMDI</b>            | 30                                    | <b>This work</b> |
| <b>1-NDI</b>             | 408                                   |                  |
| <b>1-BPDI</b>            | 447                                   |                  |
| <b>1-HFIPI</b>           | 483                                   |                  |

## Part 1: Characterization data for 1-NH<sub>2</sub> and 1-XDI MOFs

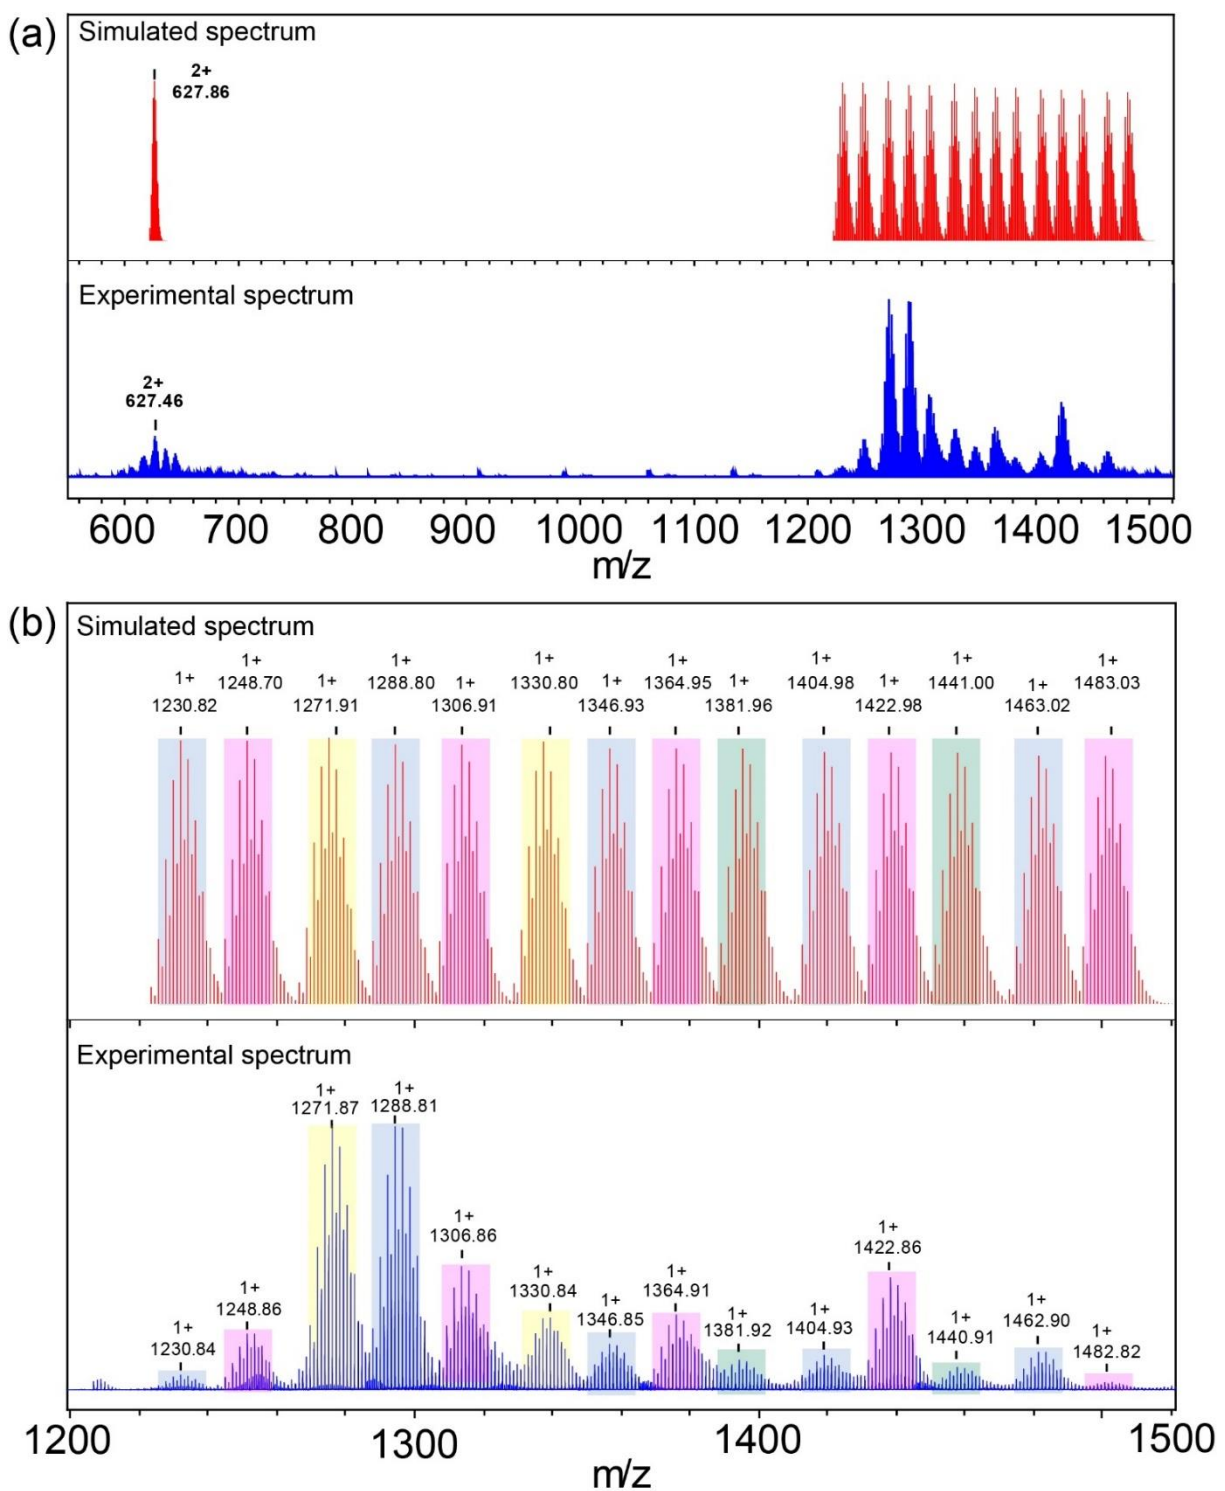

**Figure S1.** Simulated and experimental ESI-MS spectrum of **1-NH<sub>2</sub>**

Sample dissolved in acetone and measured in positive mode with m/z range from 550-1520 (a) and 1200-1500 (b).

**Table S3.** Assignment of ions observed in the ESI-MS spectrum shown in Figure S1.

| Assignments                                                                                                              | Highlight color | m/z Experimental | m/z Simulated |
|--------------------------------------------------------------------------------------------------------------------------|-----------------|------------------|---------------|
| $\text{Zn}_5\text{Cl}_3(\text{C}_6\text{H}_5\text{N}_4)_6^+$                                                             | Blue            | 1230.84          | 1230.82       |
| $\text{Zn}_5\text{Cl}_3(\text{C}_6\text{H}_5\text{N}_4)_6^+ + \text{C}_3\text{H}_6\text{O}$                              |                 | 1288.81          | 1288.80       |
| $\text{Zn}_5\text{Cl}_3(\text{C}_6\text{H}_5\text{N}_4)_6^+ + (\text{C}_3\text{H}_6\text{O})_2$                          |                 | 1346.85          | 1346.93       |
| $\text{Zn}_5\text{Cl}_3(\text{C}_6\text{H}_5\text{N}_4)_6^+ + (\text{C}_3\text{H}_6\text{O})_3$                          |                 | 1404.93          | 1404.98       |
| $\text{Zn}_5\text{Cl}_3(\text{C}_6\text{H}_5\text{N}_4)_6^+ + (\text{C}_3\text{H}_6\text{O})_4$                          |                 | 1462.90          | 1463.02       |
| $\text{Zn}_5\text{Cl}_3(\text{C}_6\text{H}_5\text{N}_4)_6^+ + \text{H}_2\text{O}$                                        | Pink            | 1248.86          | 1248.70       |
| $\text{Zn}_5\text{Cl}_3(\text{C}_6\text{H}_5\text{N}_4)_6^+ + \text{H}_2\text{O} + \text{C}_3\text{H}_6\text{O}$         |                 | 1306.86          | 1306.91       |
| $\text{Zn}_5\text{Cl}_3(\text{C}_6\text{H}_5\text{N}_4)_6^+ + \text{H}_2\text{O} + (\text{C}_3\text{H}_6\text{O})_2$     |                 | 1364.91          | 1346.93       |
| $\text{Zn}_5\text{Cl}_3(\text{C}_6\text{H}_5\text{N}_4)_6^+ + \text{H}_2\text{O} + (\text{C}_3\text{H}_6\text{O})_3$     |                 | 1422.86          | 1422.98       |
| $\text{Zn}_5\text{Cl}_3(\text{C}_6\text{H}_5\text{N}_4)_6^+ + \text{H}_2\text{O} + (\text{C}_3\text{H}_6\text{O})_4$     |                 | 1482.82          | 1483.03       |
| $\text{Zn}_5\text{Cl}_2(\text{C}_6\text{H}_5\text{N}_4)_6^{2+} + \text{OH}^- + \text{C}_3\text{H}_6\text{O}$             | Yellow          | 1271.87          | 1271.91       |
| $\text{Zn}_5\text{Cl}_2(\text{C}_6\text{H}_5\text{N}_4)_6^{2+} + \text{OH}^- + (\text{C}_3\text{H}_6\text{O})_2$         |                 | 1330.83          | 1330.80       |
| $\text{Zn}_5\text{Cl}_3(\text{C}_6\text{H}_5\text{N}_4)_6^+ + (\text{H}_2\text{O})_2 + (\text{C}_3\text{H}_6\text{O})_2$ | Green           | 1381.92          | 1381.96       |
| $\text{Zn}_5\text{Cl}_3(\text{C}_6\text{H}_5\text{N}_4)_6^+ + (\text{H}_2\text{O})_2 + (\text{C}_3\text{H}_6\text{O})_4$ |                 | 1440.91          | 1441.00       |
| $\text{Zn}_5\text{Cl}_2(\text{C}_6\text{H}_5\text{N}_4)_6^{2+} + (\text{C}_3\text{H}_6\text{O})$                         | -               | 627.46           | 627.86        |

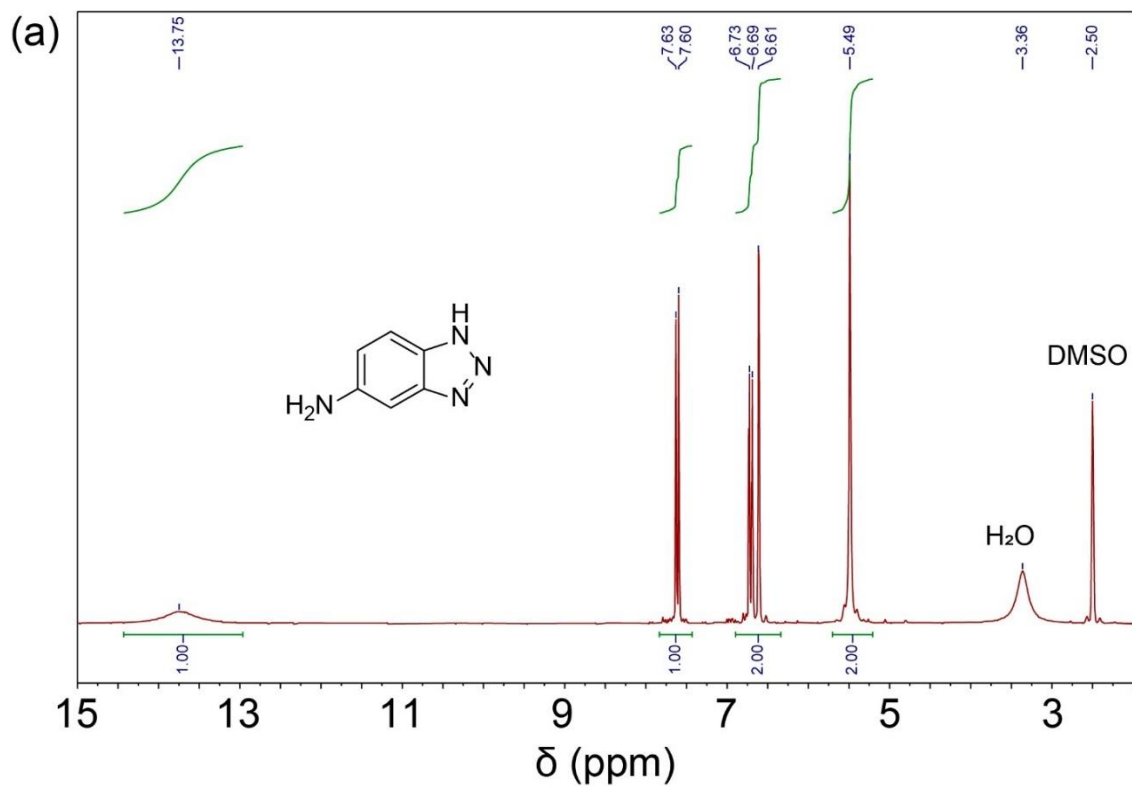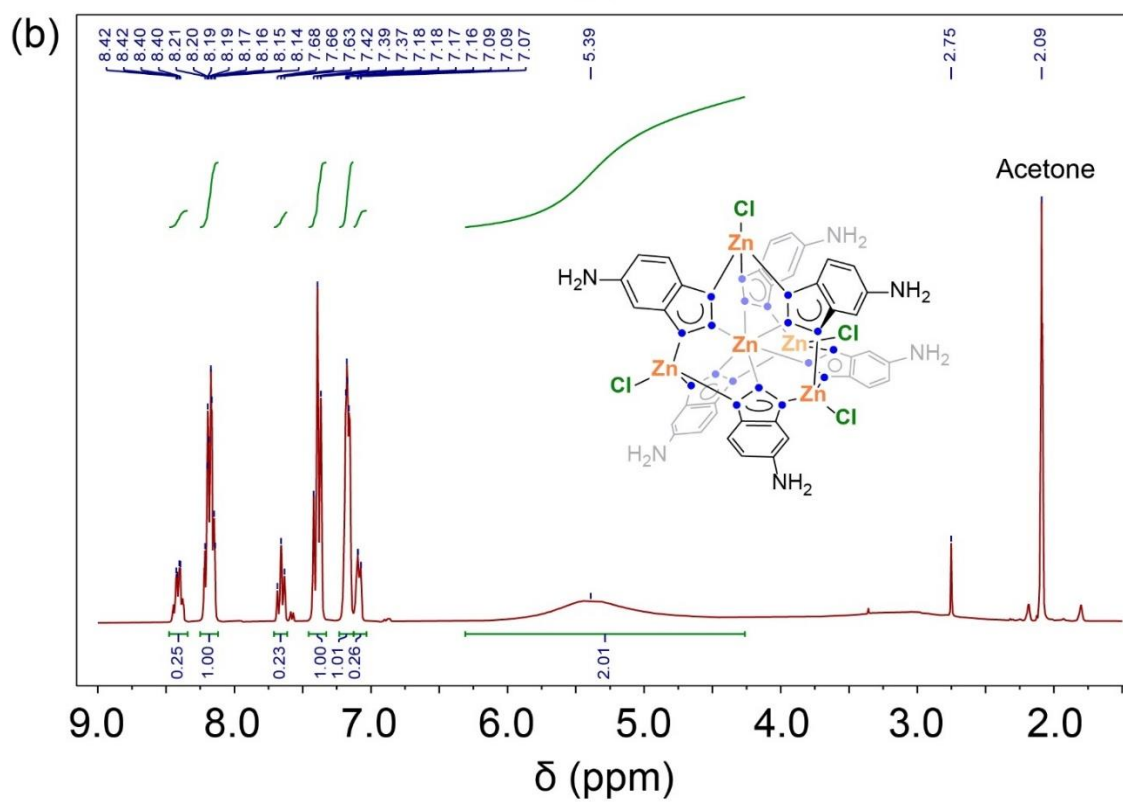

**Figure S2.** <sup>1</sup>H NMR spectra of (a) Hbt-NH<sub>2</sub> and (b) **1-NH<sub>2</sub>**.

Spectra measured in acetone-*d*<sub>6</sub>.



### $C_3$ symmetric isomers

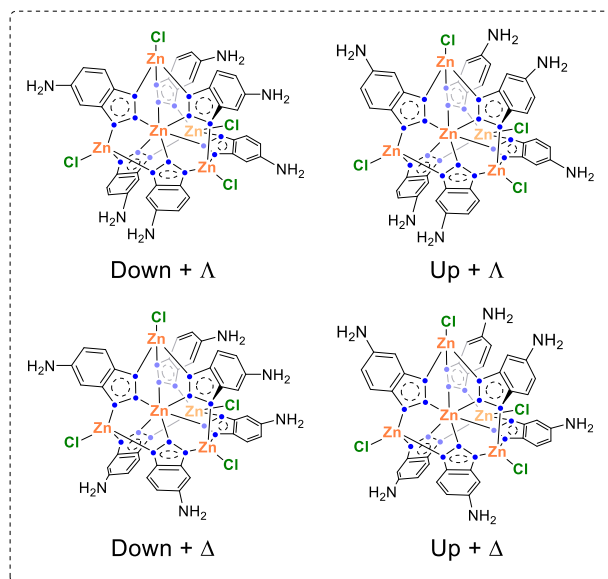

### $C_1$ symmetric isomers

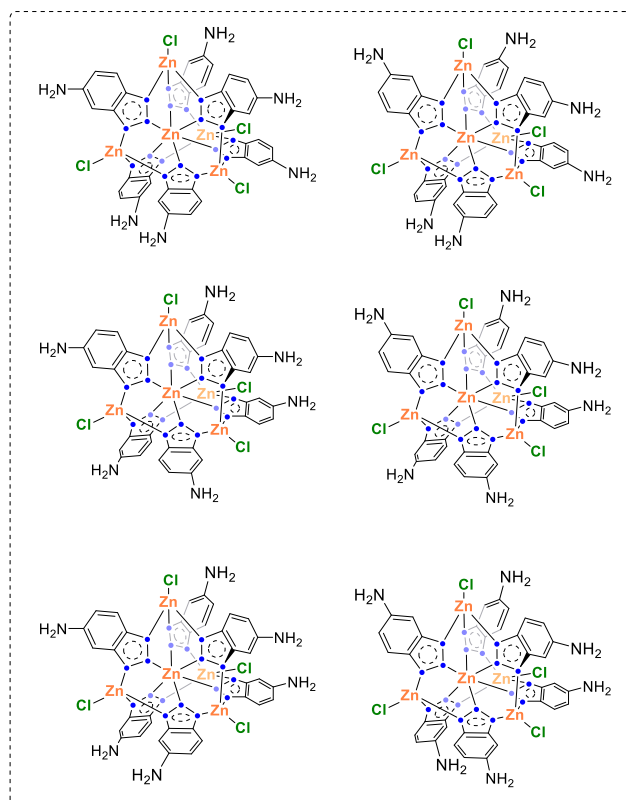

**Figure S3.** Some possible isomers of **1-NH<sub>2</sub>**.

$C_3$  and  $C_1$  symmetric isomers are included on the left and right boxes, respectively.

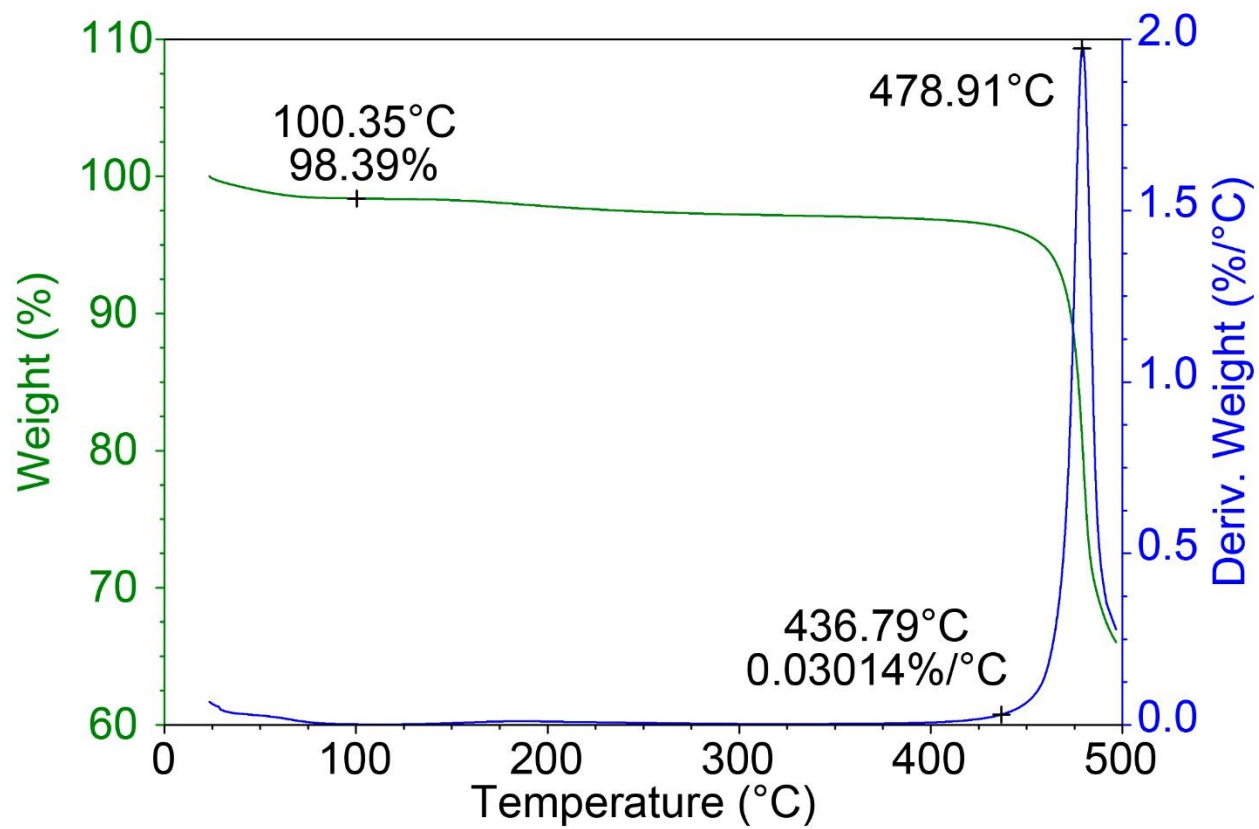

**Figure S4.** Thermogravimetric analysis data for dried 1-NH<sub>2</sub>.

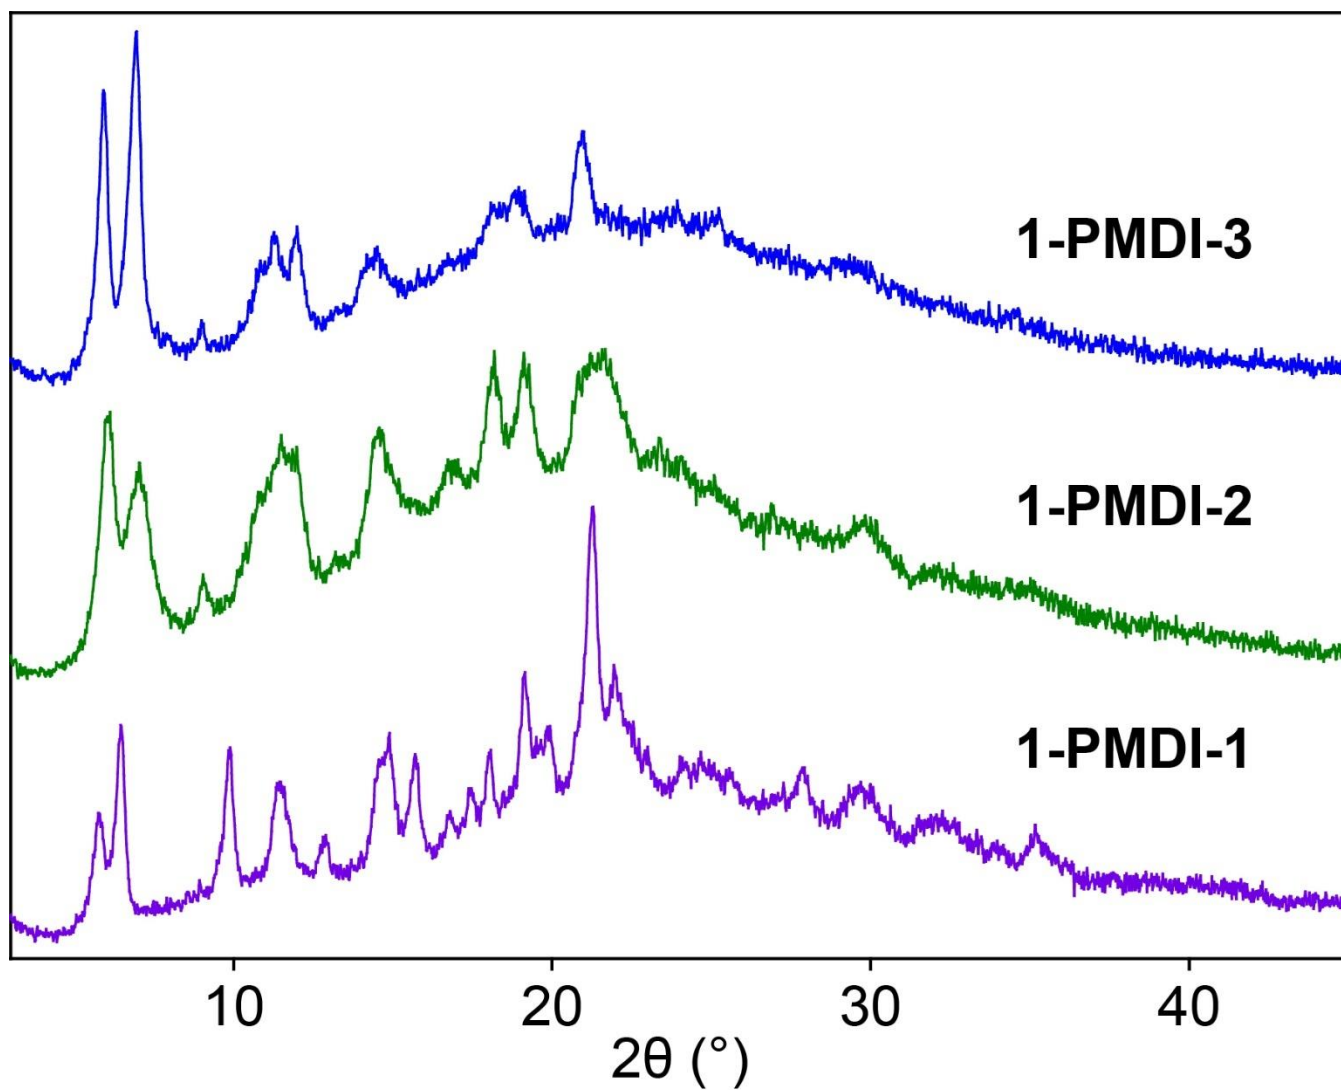

**Figure S5.** PXRD patterns measured for multiple batches of 1-PMDI.

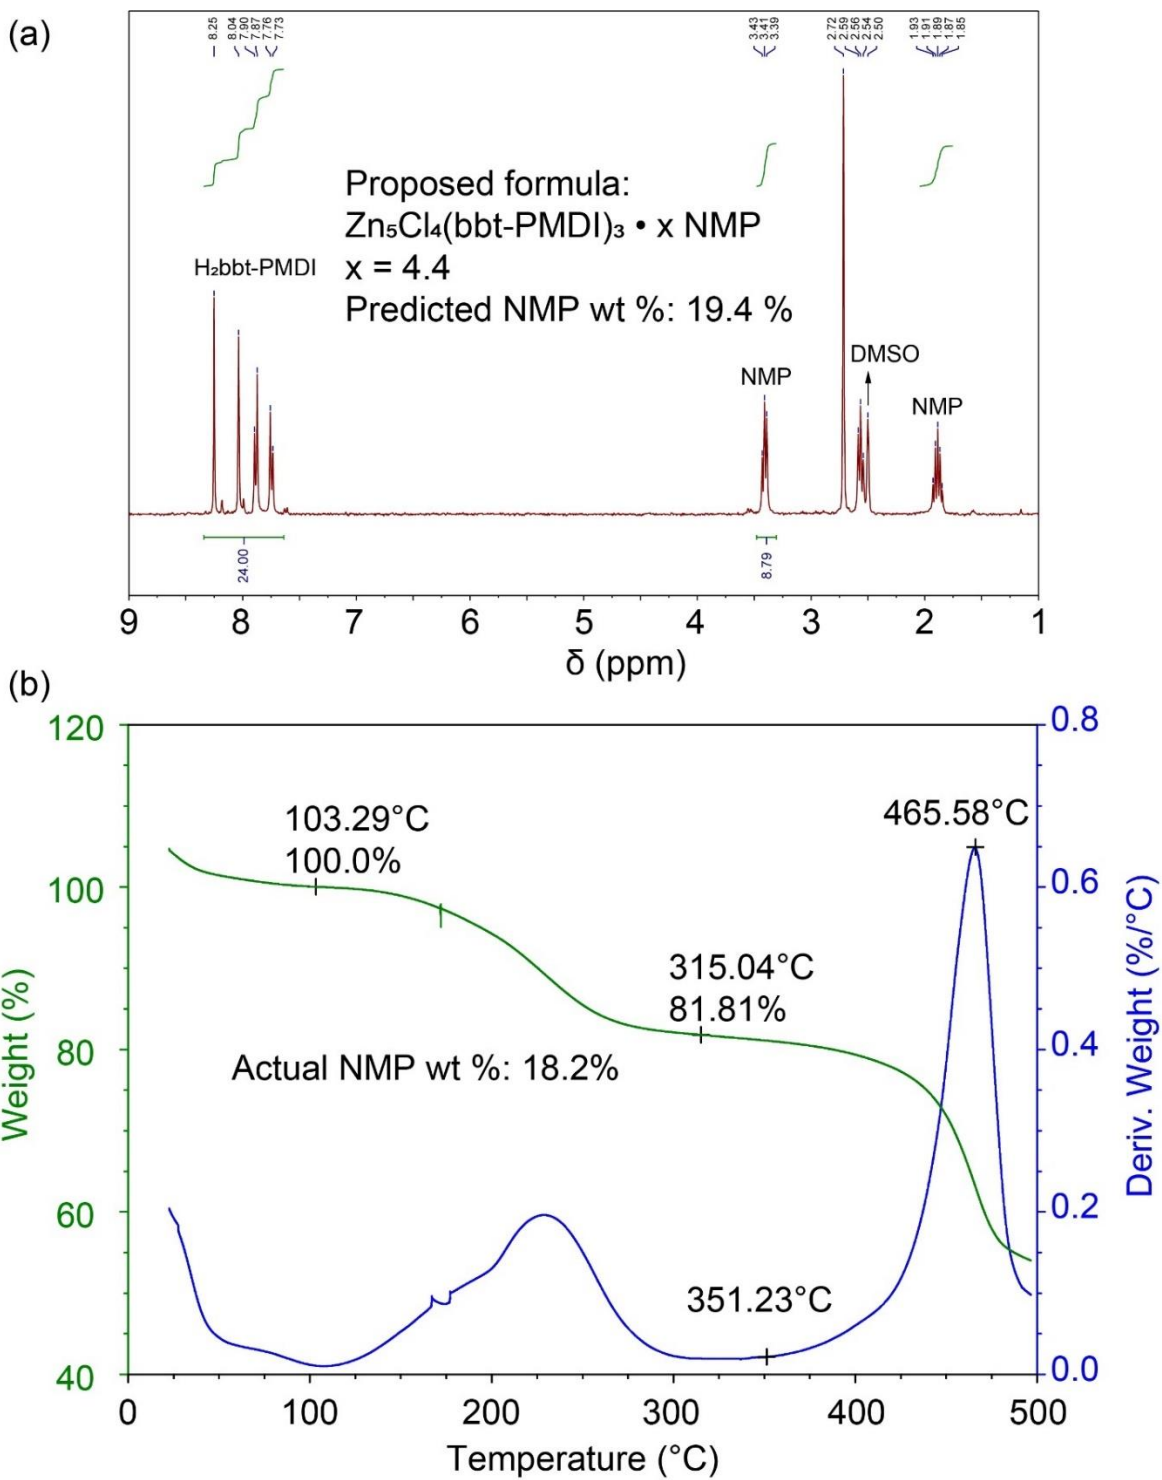

**Figure S6.** Acid-digested <sup>1</sup>H NMR spectrum and TGA data for as-synthesized **1-PMDI**.

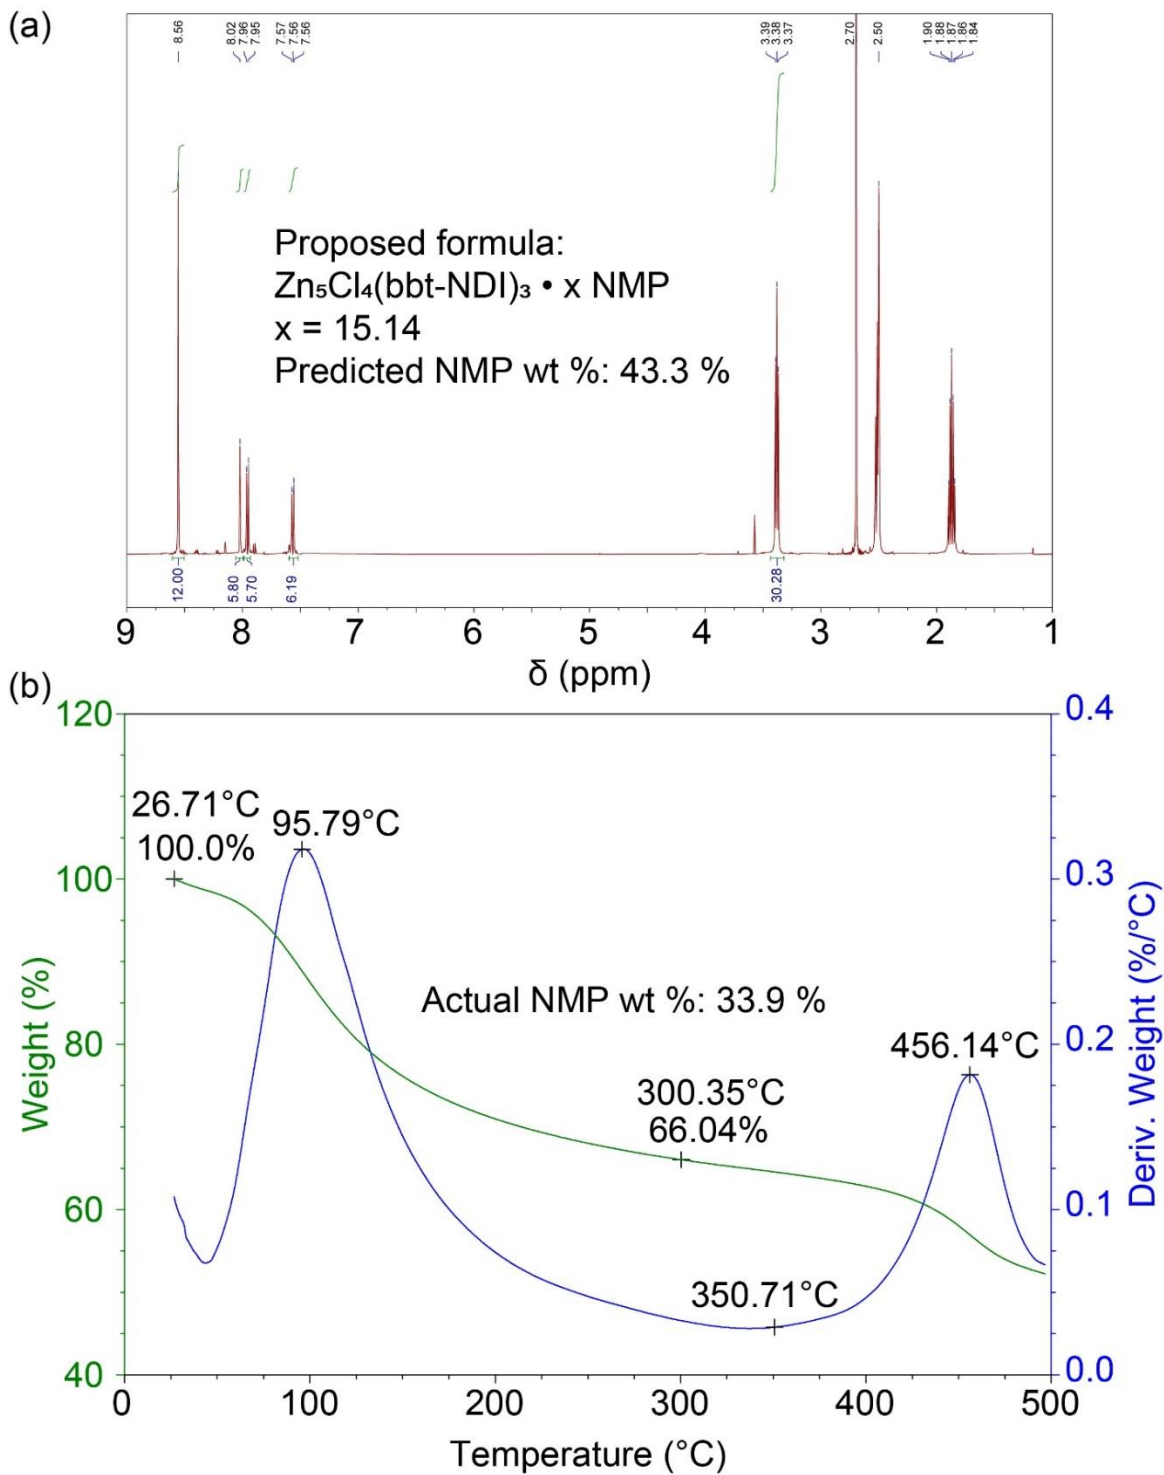

**Figure S7.** Acid-digested  $^1H$  NMR spectrum and TGA data for as-synthesized **1-NDI**.

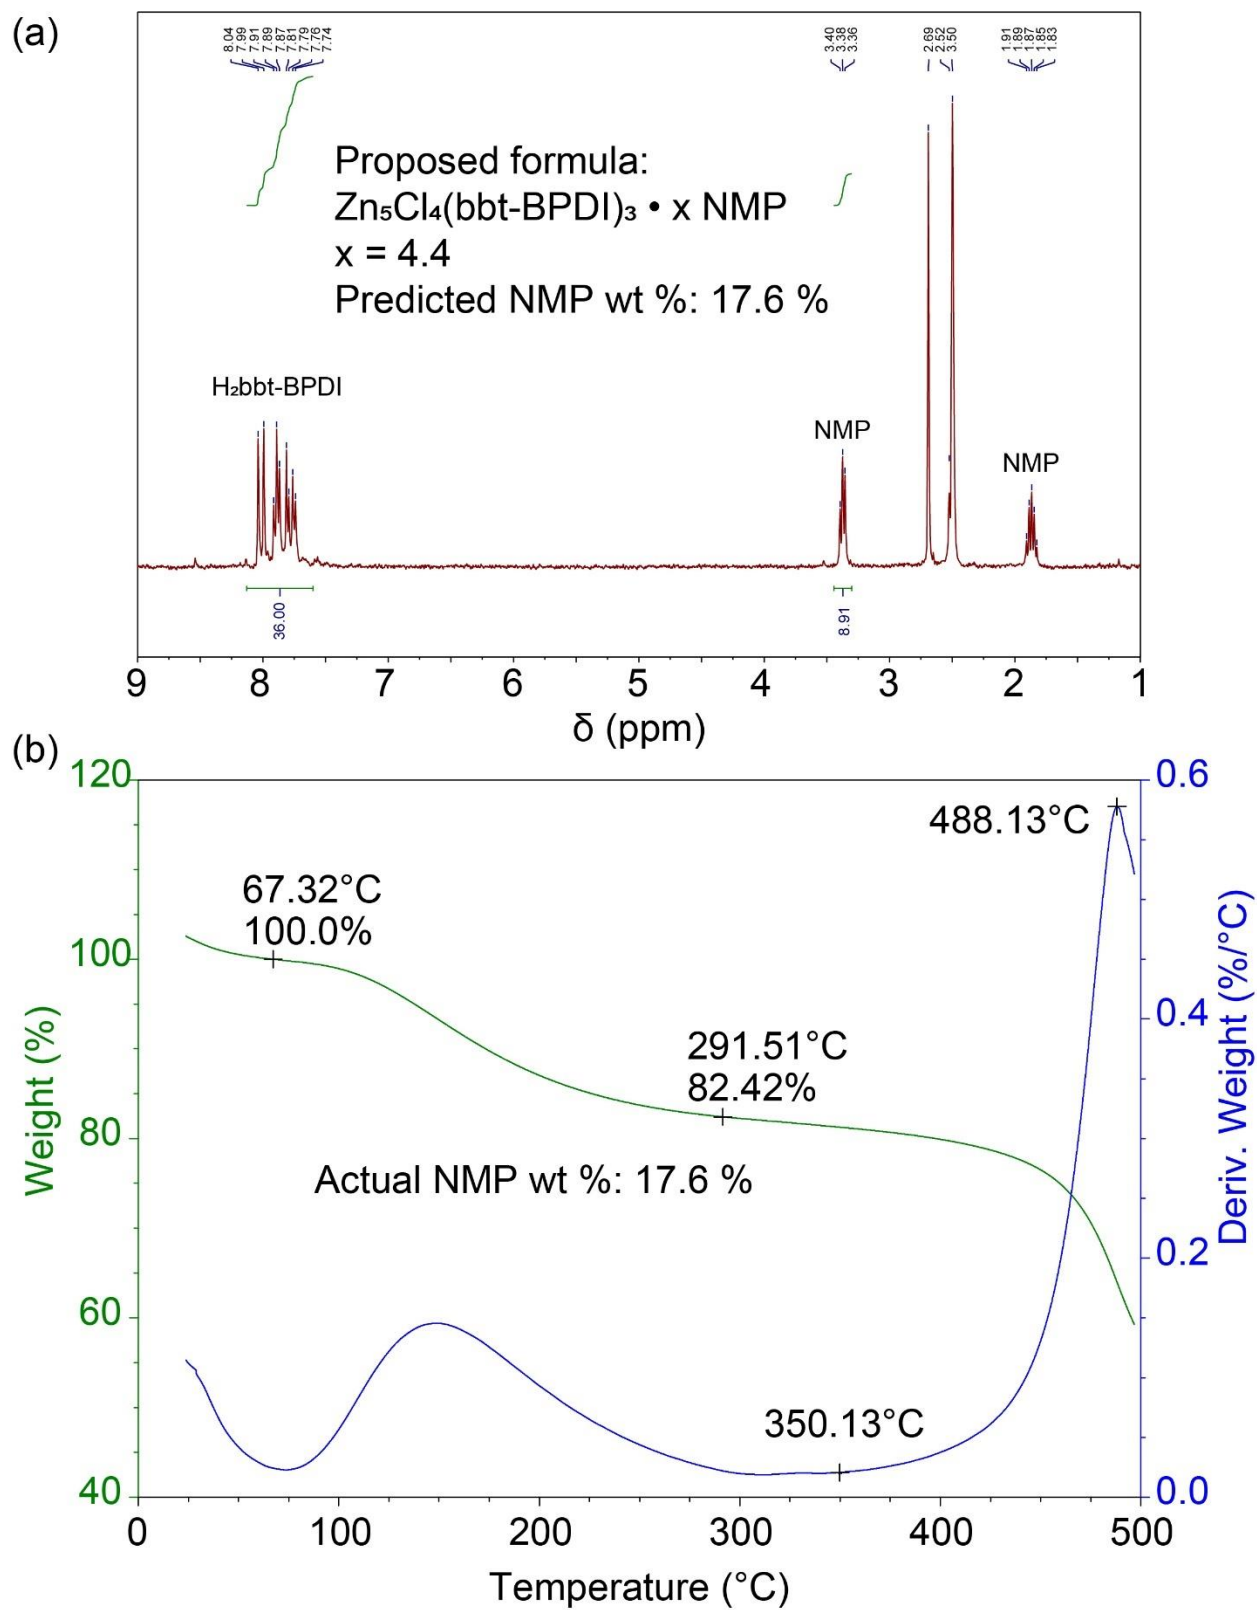

**Figure S8.** Acid-digested <sup>1</sup>H NMR spectrum and TGA data for as-synthesized **1-BPDI**.

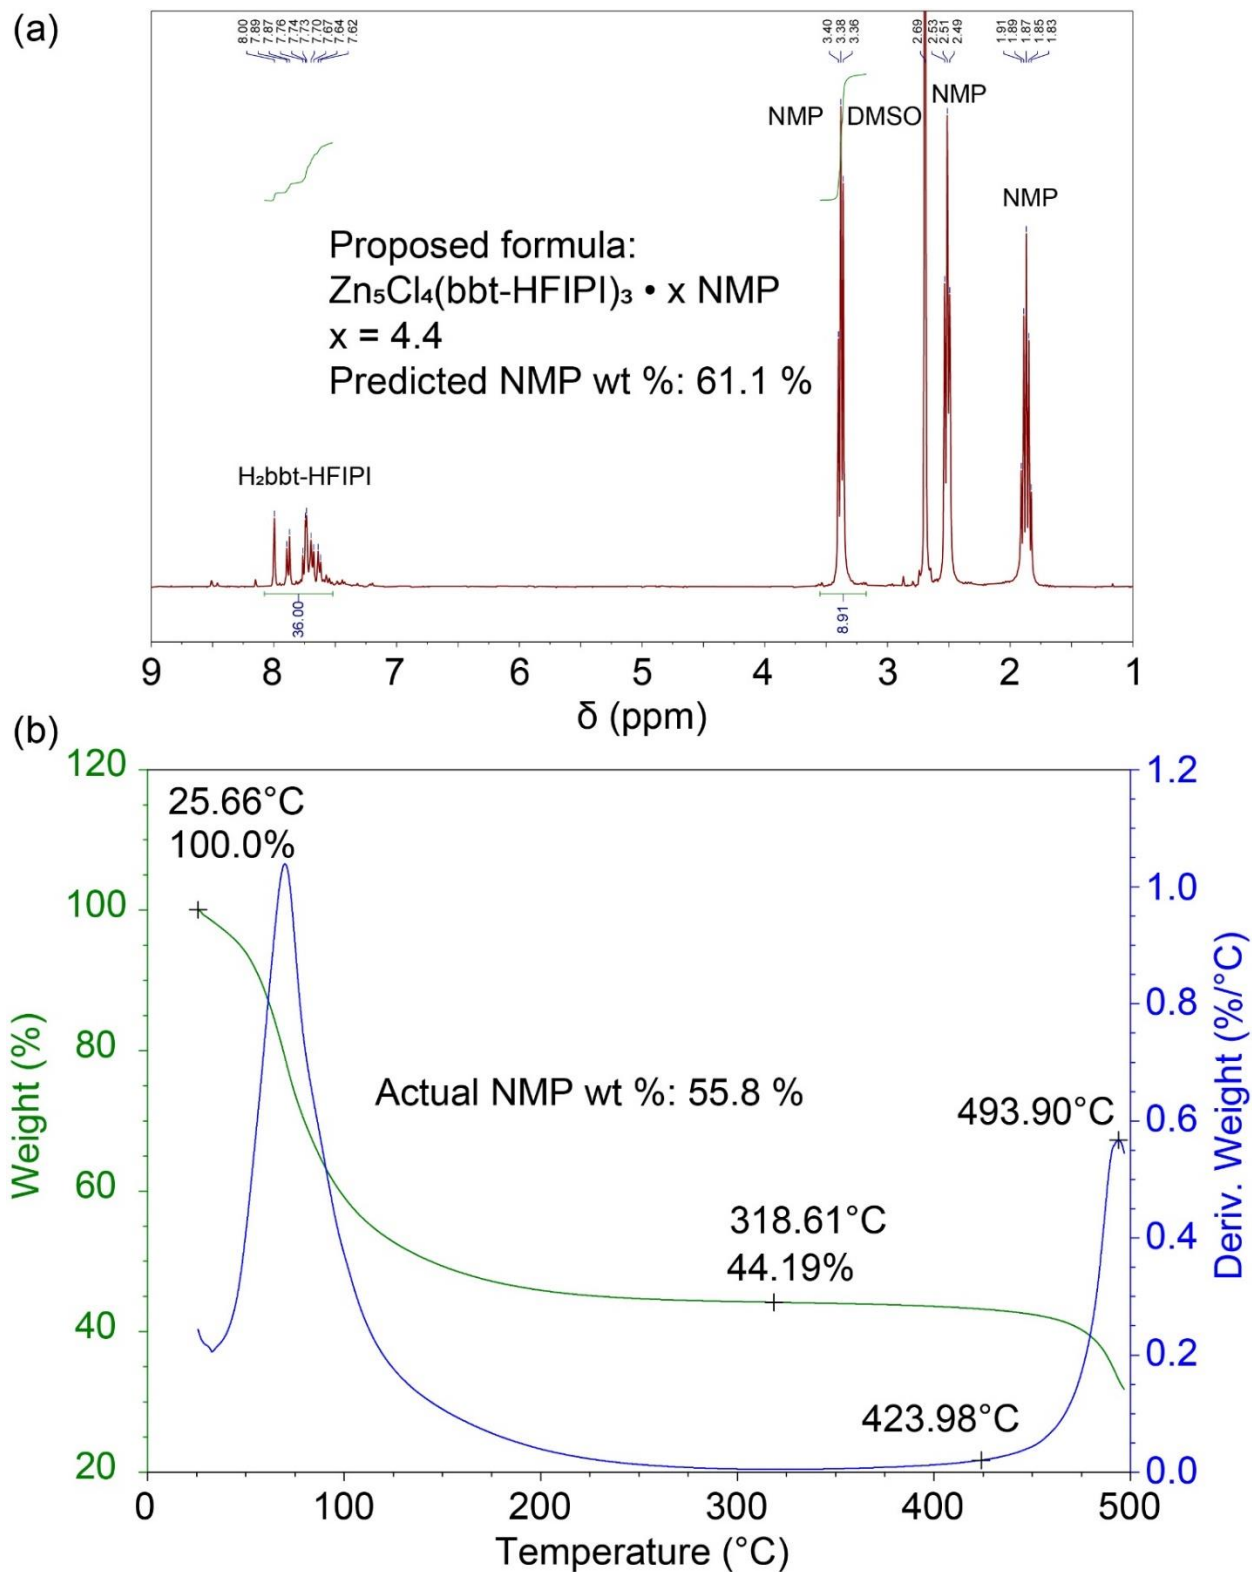

**Figure S9.** Acid-digested <sup>1</sup>H NMR spectrum and TGA data for as-synthesized **1-HFIPI**.

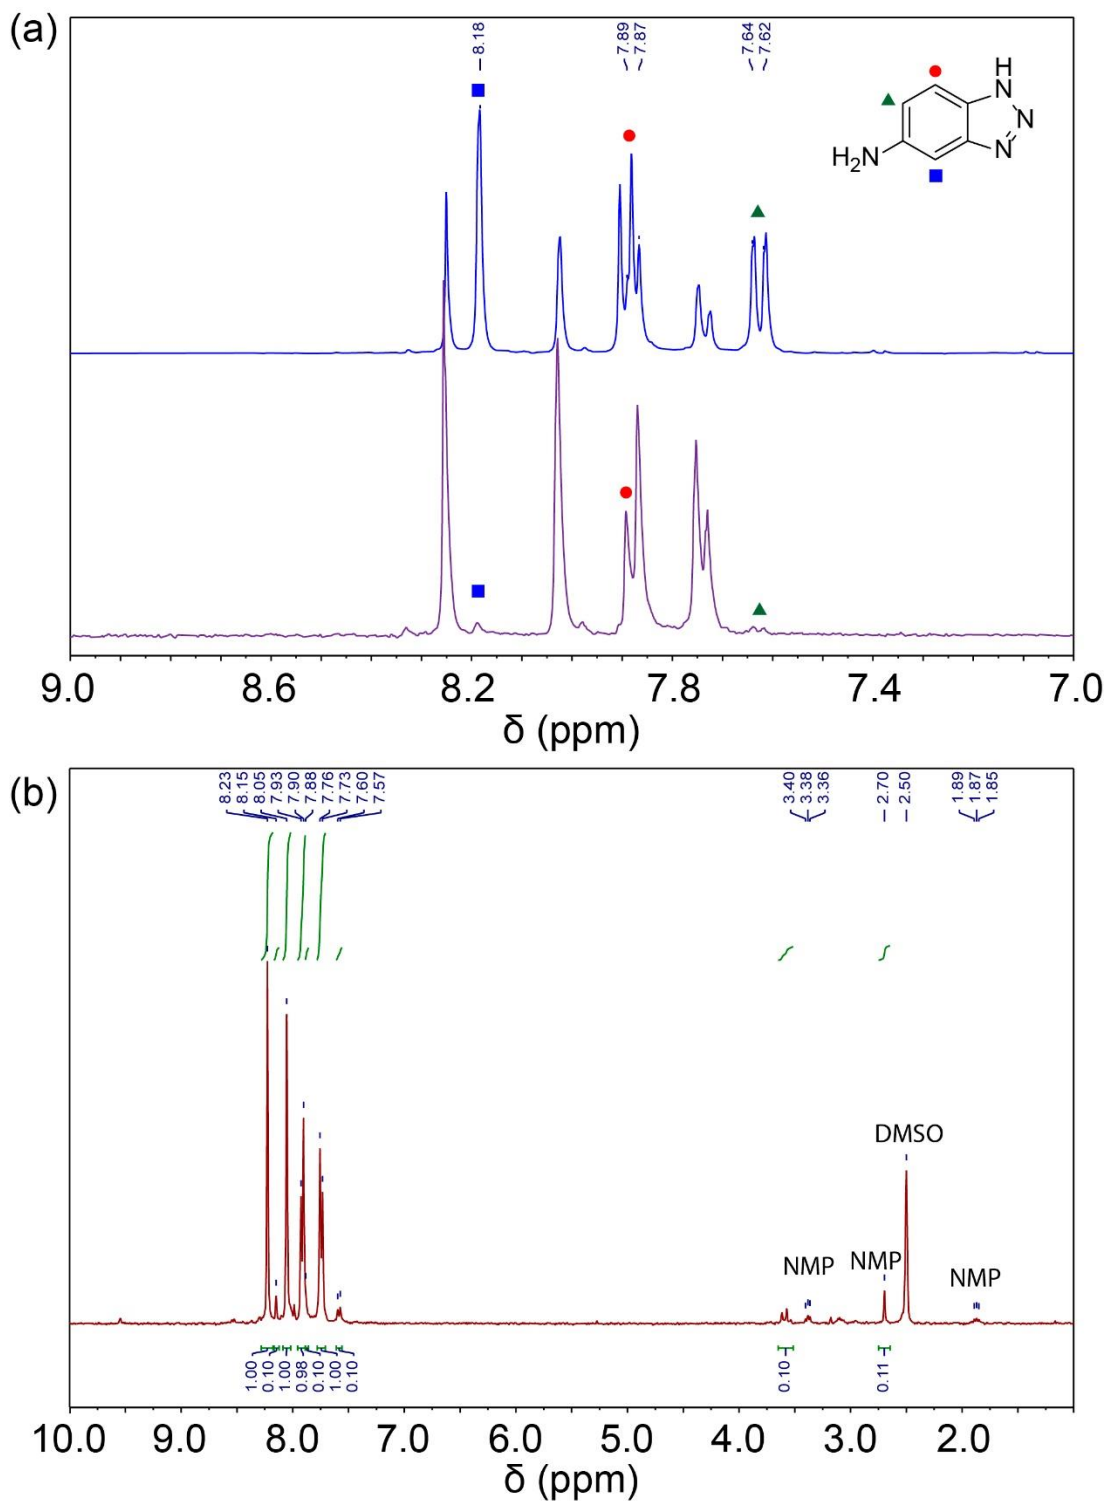

**Figure S10.** Acid-digested  $^1\text{H}$  NMR spectrum of activated **1-PMDI**.

(a) Aromatic region of the acid-digested  $^1\text{H}$  NMR spectra of activated **1-PMDI** (bottom) and the same sample spiked with **Hbt-NH<sub>2</sub>** to confirm the identity of the unreacted species (top).

(b) Full acid-digested  $^1\text{H}$  NMR spectrum of activated **1-PMDI**.



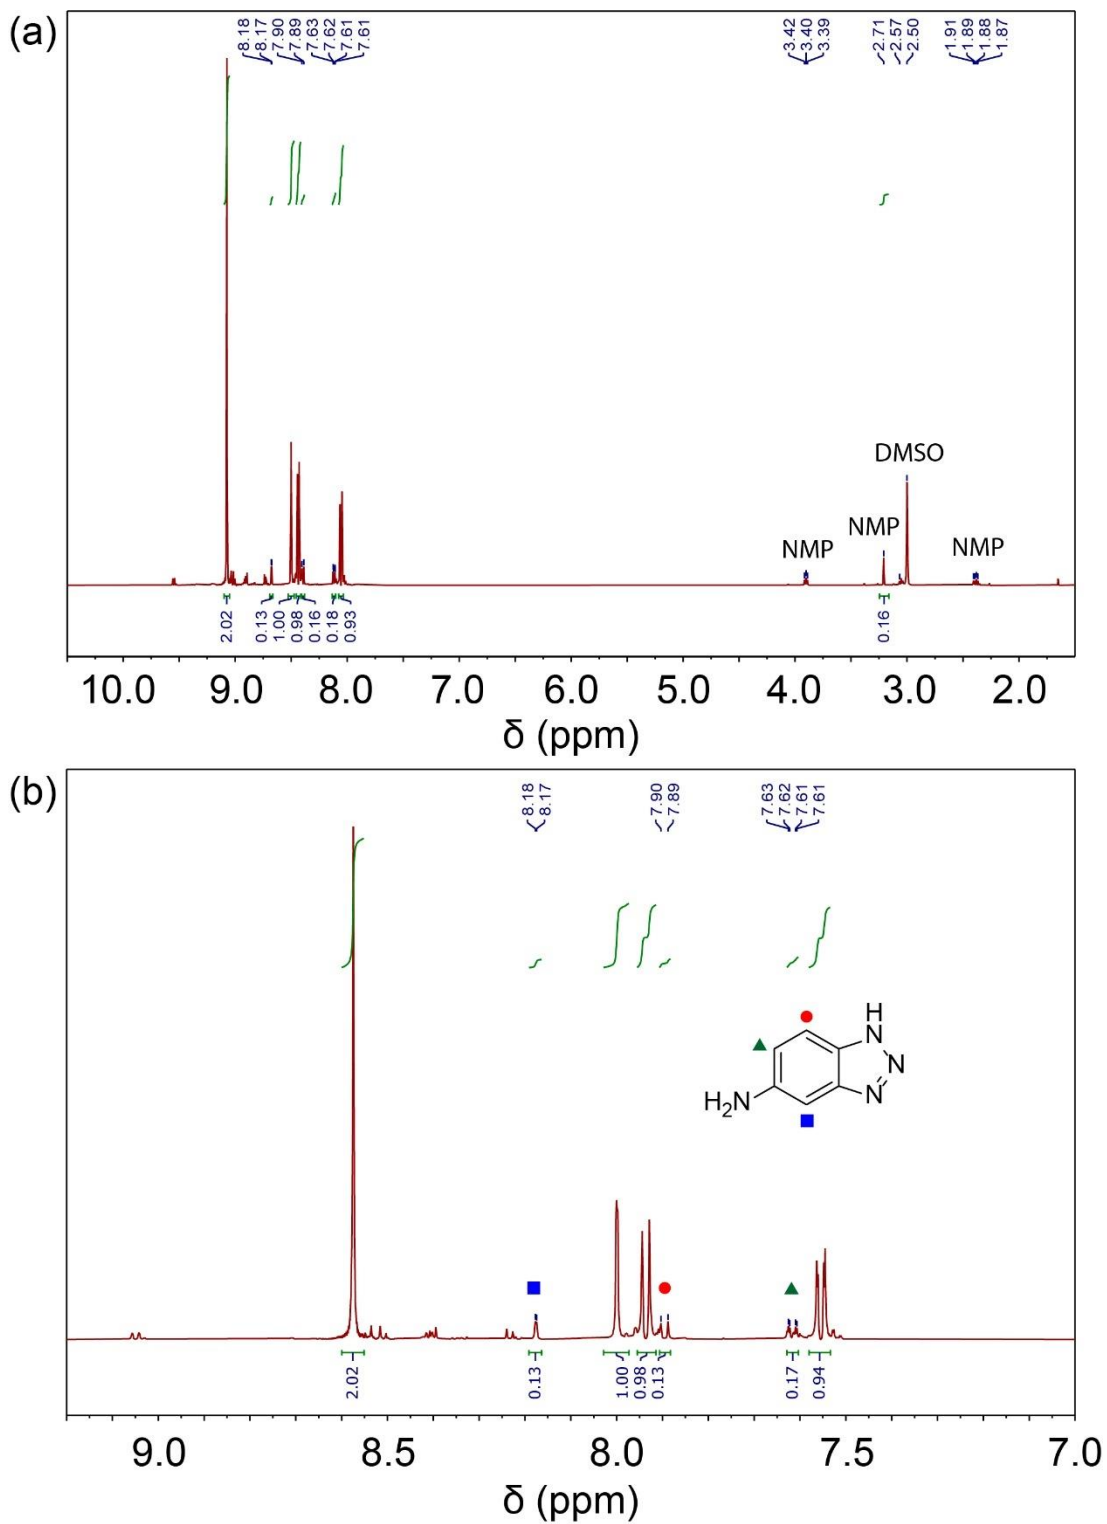

**Figure S11.** Acid-digested  $^1\text{H}$  NMR spectrum of activated 1-NDI. (a) shows the full spectrum and (b) shows only the aromatic region.

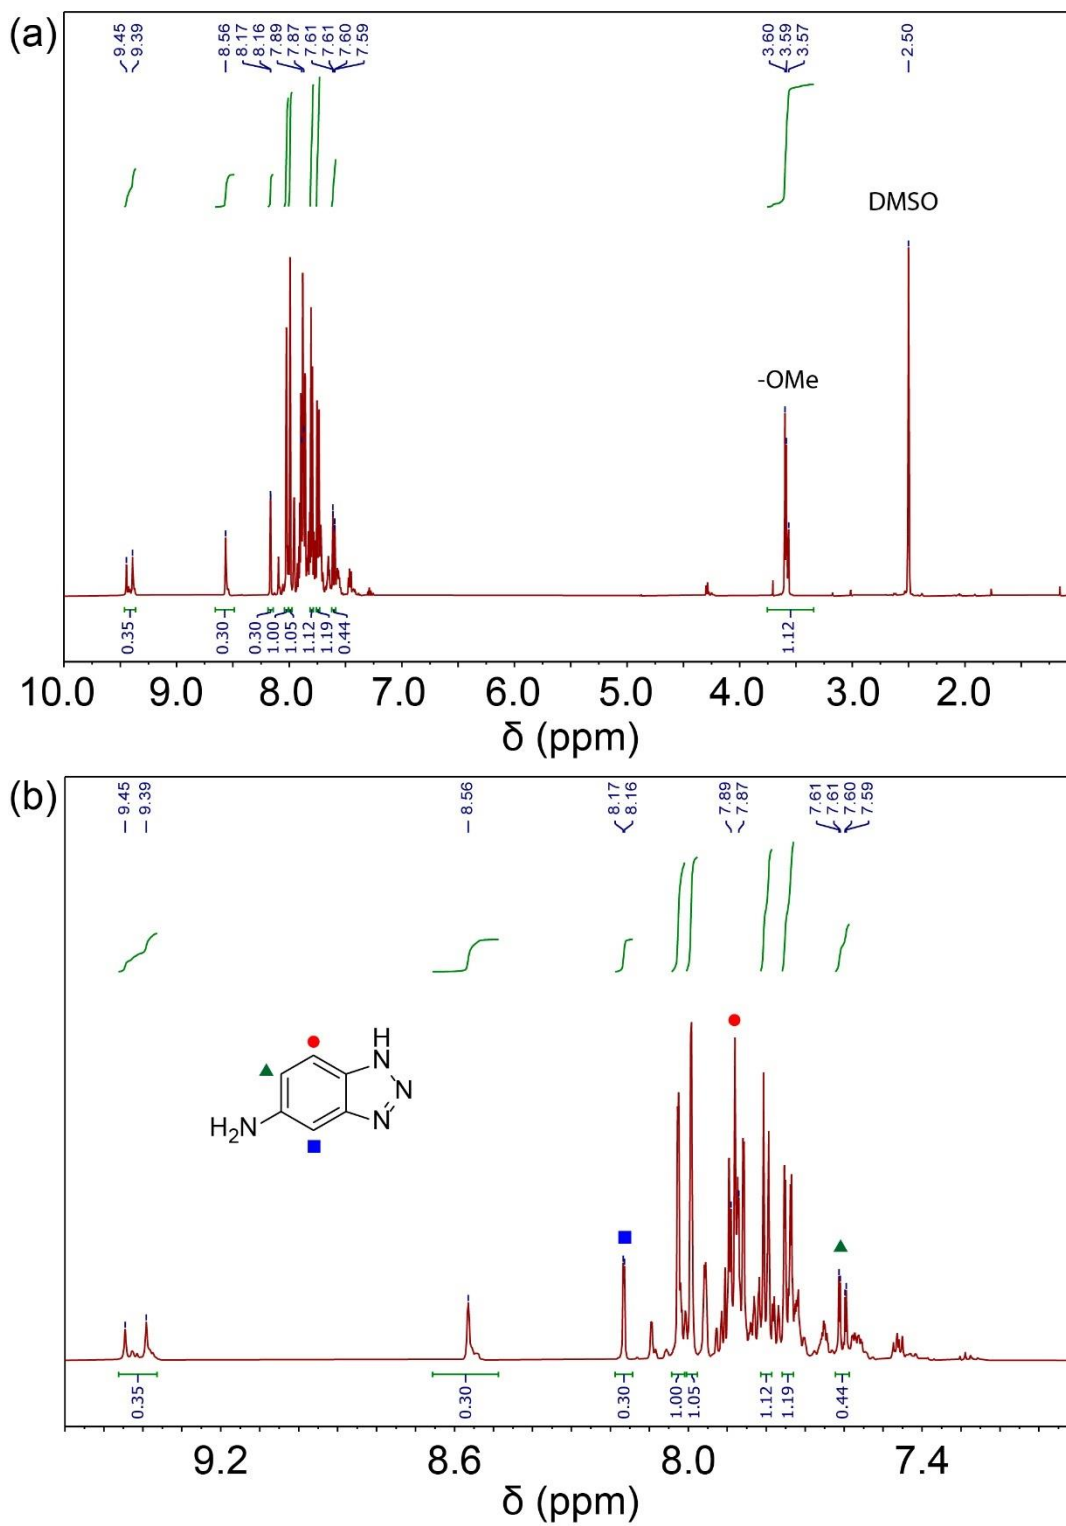

**Figure S12.** Acid-digested  $^1\text{H}$  NMR spectrum of activated 1-BPDI. (a) shows the full spectrum and (b) shows only the aromatic region.

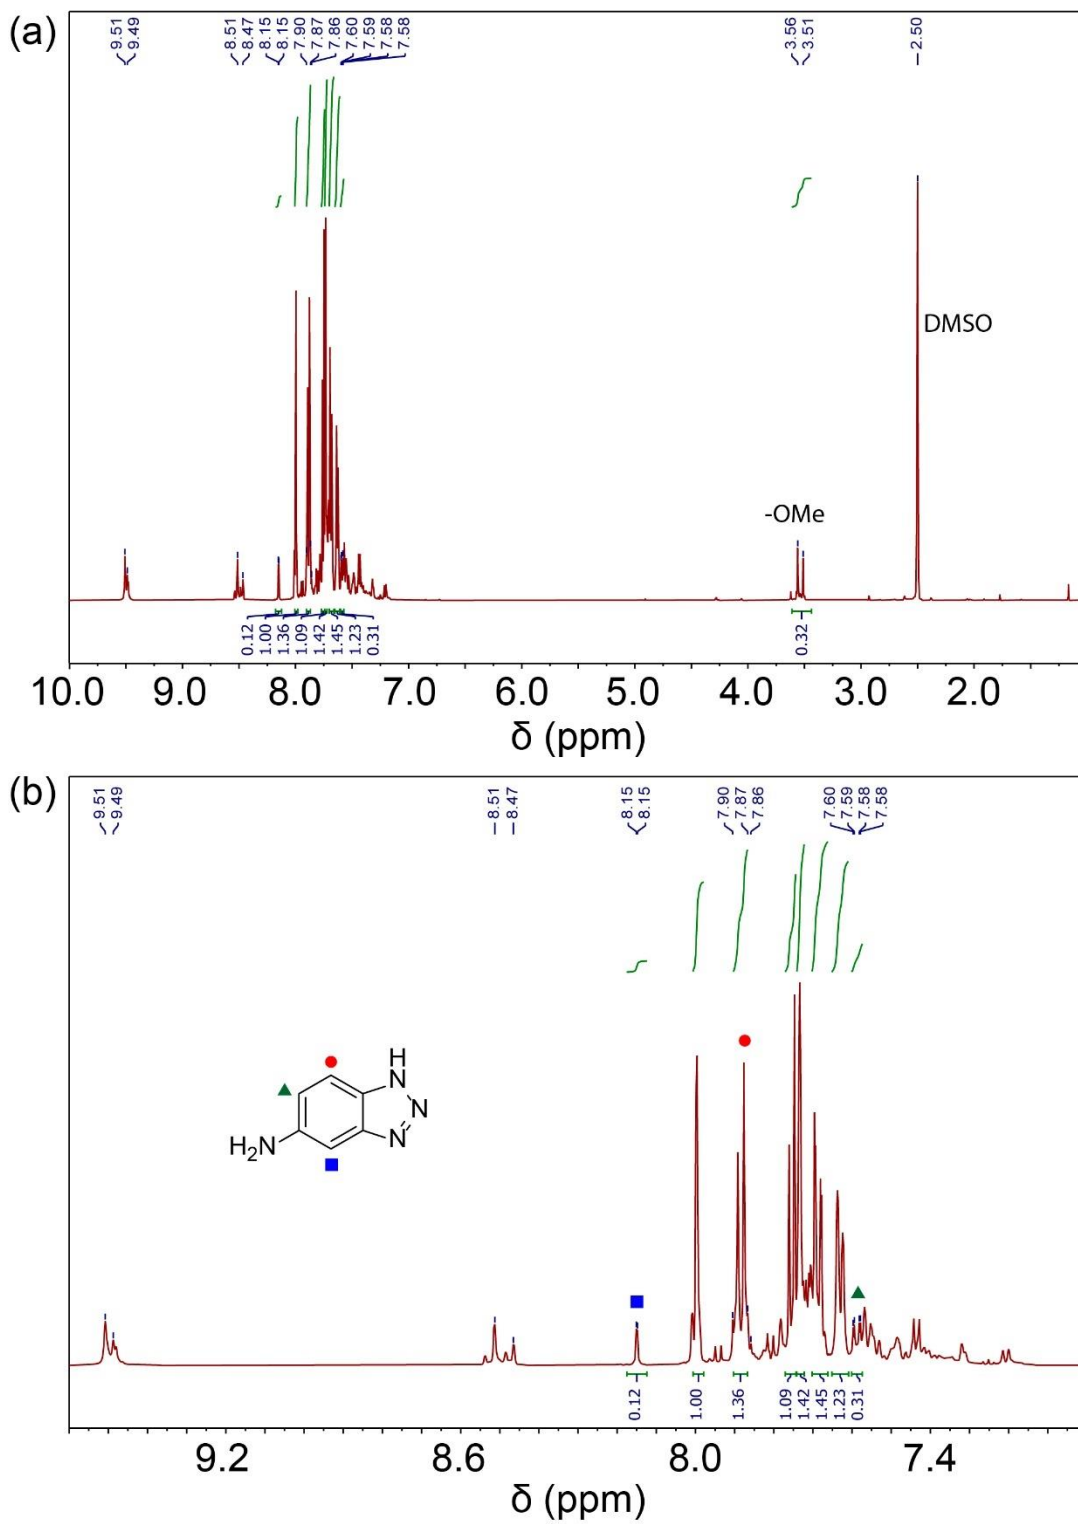

**Figure S13.** Acid-digested  $^1\text{H}$  NMR spectrum of activated 1-HFIPI. (a) shows the full spectrum and (b) shows only the aromatic region.

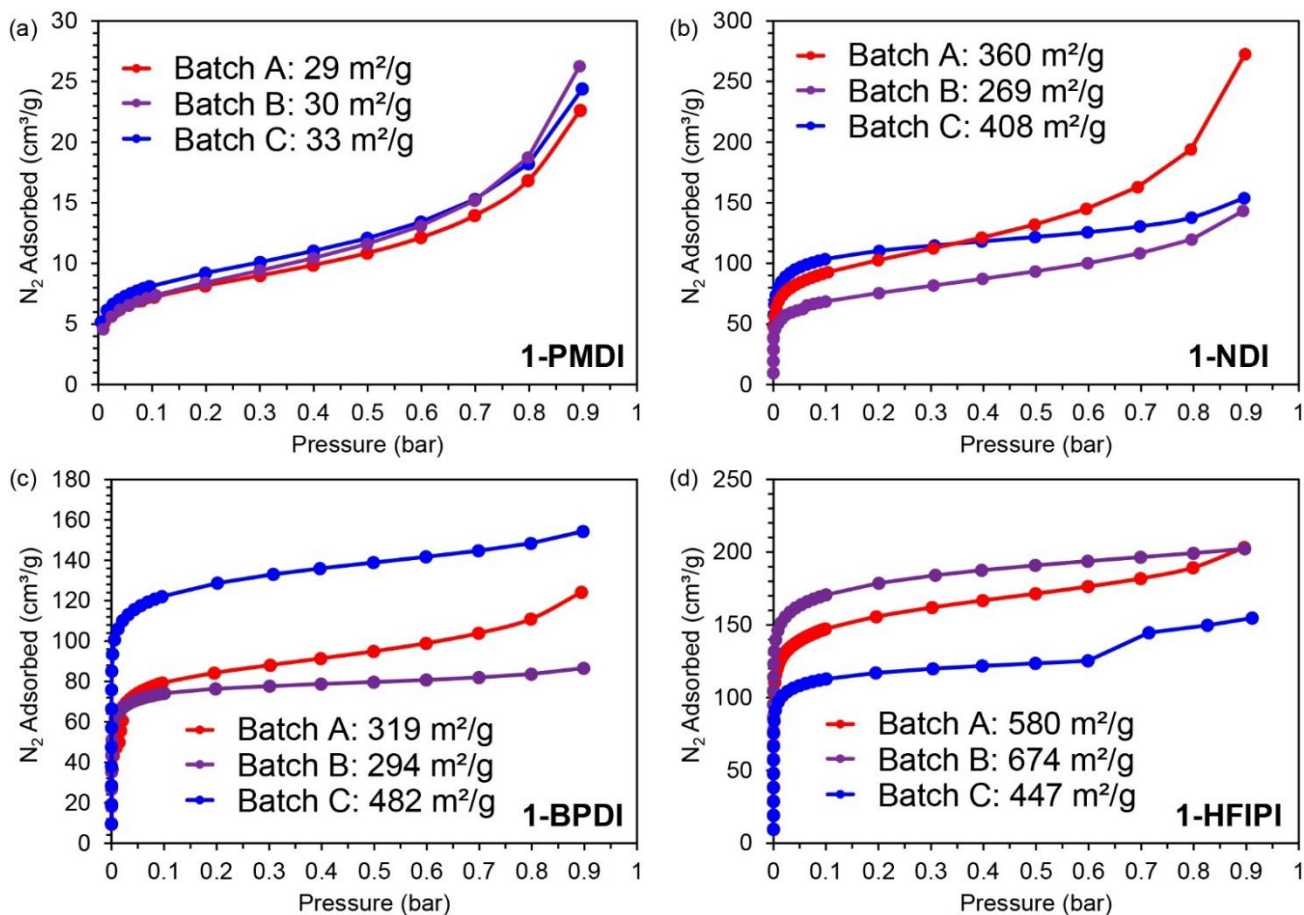

**Figure S14.**  $N_2$  adsorption isotherms (77 K) and calculated BET surface areas measured for multiple batches of the 1-XDI MOFs.

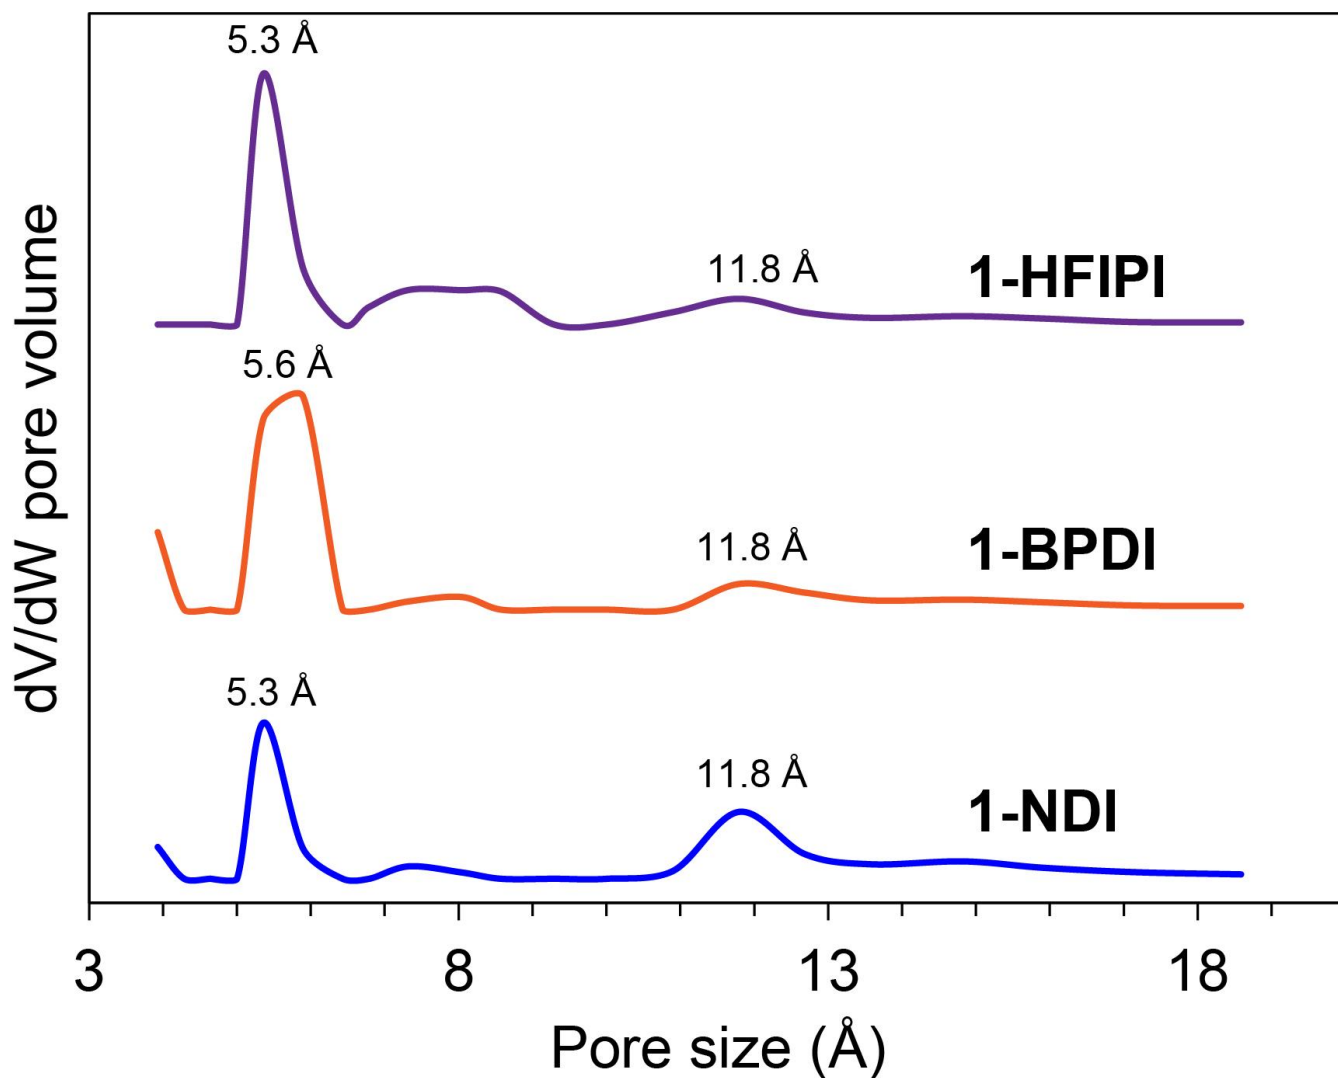

**Figure S15.** DFT pore size distributions of **1-XDI** MOFs.

DFT pore size distributions have been calculated for the **1-XDI** samples based on the  $N_2$  adsorption isotherm data (Figure S15), except **1-PMDI** due to negligible  $N_2$  uptake. The **1-XDI** samples show the presence of small micropores around 5-6 Å and a smaller volume fraction of micropores with ~12 Å diameter. The presence of relatively small micropores and the similarity in pore size distribution for these materials despite the different linker length indicate that they likely adopt interpenetrated structures.

## Elemental analysis and ICP-OES results:

CHN elemental analysis (EA) and ICP-OES analysis of Zn were performed on the **1-XDI** **2-XDI** MOFs. Based on literature precedent (see main text), pentanuclear  $Zn_5$  clusters or nonanuclear  $Zn_9$  clusters were considered as possible SBUs. The corresponding empirical formulas have been included with the data in Table S4-Table S11 below. The sum of squares error (SSE) between the theoretical and experimental EA and ICP-OES results have been calculated as a means of comparing the goodness-of-fit of the experimental results with the proposed empirical formulas.

**Table S4.** Elemental analysis and ICP results for **1-PMDI**.

| Elements | Theo. %: $Zn_5$ | Exp. % | Error: $Zn_5$ |
|----------|-----------------|--------|---------------|
| C        | 43.70           | 45.95  | -2.25         |
| H        | 1.33            | 1.74   | -0.41         |
| N        | 18.53           | 19.56  | -1.03         |
| Zn       | 18.02           | 19.41  | -1.39         |
|          |                 | SSE:   | <b>8.20</b>   |

***$Zn_5$  empirical formula:***  $Zn_5Cl_4(\text{bbt-PMDI})_3$ ,  $C_{66}H_{24}Cl_4N_{24}O_{12}Zn_5$

**Table S5.** Elemental analysis and ICP results for **1-BPDI**.

| Elements | Theo. %: $Zn_5$ | Exp. % | Error: $Zn_5$ |
|----------|-----------------|--------|---------------|
| C        | 49.40           | 50.51  | -1.11         |
| H        | 1.78            | 2.21   | -0.43         |
| N        | 16.46           | 16.51  | -0.05         |
| Zn       | 16.01           | 14.01  | 2.00          |
|          |                 | SSE:   | <b>5.42</b>   |

***$Zn_5$  empirical formula:***  $Zn_5Cl_4(\text{bbt-BPDI})_3$ ,  $C_{84}H_{36}Cl_4N_{24}O_{12}Zn_5$

**Table S6.** Elemental analysis and ICP results for **1-NDI**.

| Elements | Theo. %: $Zn_5$ | Exp. % | Error: $Zn_5$ |
|----------|-----------------|--------|---------------|
| C        | 47.70           | 48.78  | -1.08         |
| H        | 1.54            | 2.08   | -0.54         |
| N        | 17.12           | 17.1   | 0.02          |
| Zn       | 16.65           | 14.28  | 2.37          |
|          |                 | SSE:   | <b>7.07</b>   |

***$Zn_5$  empirical formula:***  $Zn_5Cl_4(\text{bbt-NDI})_3$ ,  $C_{78}H_{30}Cl_4N_{24}O_{12}Zn_5$

**Table S7.** Elemental analysis and ICP results for **1-HFIPI**.

| Elements | Theo. %: Zn <sub>5</sub> | Exp. % | Error: Zn <sub>5</sub> |
|----------|--------------------------|--------|------------------------|
| C        | 44.82                    | 45.88  | -1.06                  |
| H        | 1.46                     | 1.66   | -0.20                  |
| N        | 13.49                    | 13.25  | 0.24                   |
| Zn       | 13.12                    | 13.43  | -0.31                  |
|          |                          | SSE:   | <b>1.32</b>            |

**Zn<sub>5</sub> empirical formula:** Zn<sub>5</sub>Cl<sub>4</sub>(btt-HFIPI)<sub>3</sub>, C<sub>93</sub>H<sub>36</sub>Cl<sub>4</sub>F<sub>18</sub>N<sub>24</sub>O<sub>12</sub>Zn<sub>5</sub>

**Table S8.** Elemental analysis and ICP results for **2-PMDI**.

| Elements | Theo. %: Zn <sub>5</sub> | Theo. %: Zn <sub>9</sub> | Exp. % | Error: Zn <sub>5</sub> | Error: Zn <sub>9</sub> |
|----------|--------------------------|--------------------------|--------|------------------------|------------------------|
| C        | 46.58                    | 47.61                    | 43.16  | 3.42                   | 4.45                   |
| H        | 1.90                     | 1.83                     | 2.24   | -0.34                  | -0.41                  |
| N        | 17.62                    | 18.51                    | 15.66  | 1.96                   | 2.85                   |
|          |                          |                          | SSE:   | <b>15.65</b>           | <b>28.09</b>           |

**Zn<sub>5</sub> and Zn<sub>9</sub> empirical formulas:**

Zn<sub>5</sub>(CH<sub>3</sub>COO)<sub>4</sub>(btt-PMDI)<sub>3</sub>: C<sub>74</sub>H<sub>36</sub>N<sub>24</sub>O<sub>20</sub>Zn<sub>5</sub>

Zn<sub>9</sub>(CH<sub>3</sub>COO)<sub>6</sub>(btt-PMDI)<sub>6</sub>: C<sub>144</sub>H<sub>66</sub>N<sub>48</sub>O<sub>36</sub>Zn<sub>9</sub>

The acid-digested <sup>1</sup>H NMR spectrum of **2-PMDI** shows a low acetate:linker ratio (1:1) that is consistent with Zn<sub>9</sub> cluster building units (Figure S30). However, the high SSE values (>15) do not strongly support empirical formulas derived from either Zn<sub>5</sub> or Zn<sub>9</sub> clusters.

**Table S9.** Elemental analysis and ICP results for **2-BPDI**.

| Elements | Theo. %: Zn <sub>5</sub> | Theo. %: Zn <sub>9</sub> | Exp. % | Error: Zn <sub>5</sub> | Error: Zn <sub>9</sub> |
|----------|--------------------------|--------------------------|--------|------------------------|------------------------|
| C        | 51.72                    | 52.87                    | 48.98  | 2.74                   | 3.89                   |
| H        | 2.26                     | 2.22                     | 2.72   | -0.46                  | -0.50                  |
| N        | 15.73                    | 16.44                    | 14.95  | 0.78                   | 1.49                   |
| Zn       | 15.30                    | 14.39                    | 16.40  | -1.10                  | -2.01                  |
|          |                          |                          | SSE:   | <b>9.54</b>            | <b>21.64</b>           |

**Zn<sub>5</sub> and Zn<sub>9</sub> empirical formulas:**

Zn<sub>5</sub>(CH<sub>3</sub>COO)<sub>4</sub>(btt-BPDI)<sub>3</sub>: C<sub>92</sub>H<sub>48</sub>N<sub>24</sub>O<sub>20</sub>Zn<sub>5</sub>

Zn<sub>9</sub>(CH<sub>3</sub>COO)<sub>6</sub>(btt-BPDI)<sub>6</sub>: C<sub>180</sub>H<sub>90</sub>N<sub>48</sub>O<sub>36</sub>Zn<sub>9</sub>

The acid-digested  $^1\text{H}$  NMR spectrum of **2-BPDI** shows a lower acetate:linker ratio (0.8 : 1) than would be expected for the presence of  $\text{Zn}_5$  or  $\text{Zn}_9$  clusters (**Figure S31**). The high SSE values also do not strongly support empirical formulas derived from either  $\text{Zn}_5$  or  $\text{Zn}_9$  clusters.

**Table S10.** Elemental analysis and ICP results for **2-NDI**.

| Elements | Theo. %: $\text{Zn}_5$ | Theo. %: $\text{Zn}_9$ | Exp. % | Error: $\text{Zn}_5$ | Error: $\text{Zn}_9$ |
|----------|------------------------|------------------------|--------|----------------------|----------------------|
| C        | 47.70                  | 49.41                  | 50.08  | -2.38                | -0.67                |
| H        | 1.54                   | 1.60                   | 2.19   | -0.65                | -0.59                |
| N        | 17.12                  | 17.73                  | 17.77  | -0.65                | -0.04                |
| Zn       | 16.65                  | 15.52                  | 13.82  | 2.83                 | 1.70                 |
|          |                        |                        | SSE:   | <b>14.51</b>         | <b>3.69</b>          |

***Zn<sub>5</sub> and Zn<sub>9</sub> empirical formulas:***

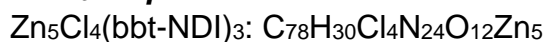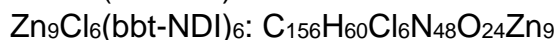

The high SSE values (~10) also do not strongly support empirical formulas derived from either  $\text{Zn}_5$  or  $\text{Zn}_9$  clusters.

**Table S11.** Elemental analysis and ICP results for **2-HFIPI**.

| Elements | Theo. %: $\text{Zn}_5$ | Theo. %: $\text{Zn}_9$ | Exp. % | Error: $\text{Zn}_5$ | Error: $\text{Zn}_9$ |
|----------|------------------------|------------------------|--------|----------------------|----------------------|
| C        | 44.82                  | 46.08                  | 45.4   | -0.58                | 0.68                 |
| H        | 1.46                   | 1.50                   | 1.94   | -0.48                | -0.44                |
| N        | 13.49                  | 13.87                  | 13.70  | -0.21                | 0.17                 |
| Zn       | 13.12                  | 12.14                  | 12.98  | 0.14                 | -0.84                |
|          |                        |                        | SSE:   | <b>0.64</b>          | <b>1.39</b>          |

***Zn<sub>5</sub> and Zn<sub>9</sub> empirical formulas:***

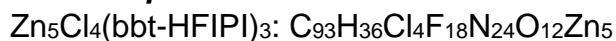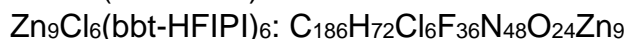

The relatively low SSE values for **2-HFIPI** reflect a good fit with empirical formulas derived from either  $\text{Zn}_5$  or  $\text{Zn}_9$  clusters. However, the acid-digested  $^1\text{H}$  NMR and ATR-IR spectra of **2-HFIPI** show a large percentage of hydrolyzed linker species (**Figure S33** and **Figure S34**), meaning that **2-HFIPI** is unlikely to contain  $\text{Zn}_5$  or  $\text{Zn}_9$  clusters.



## Part 2: $^1\text{H}$ NMR and ATR-IR spectra of $\text{H}_2\text{bbt-XDI}$ linkers

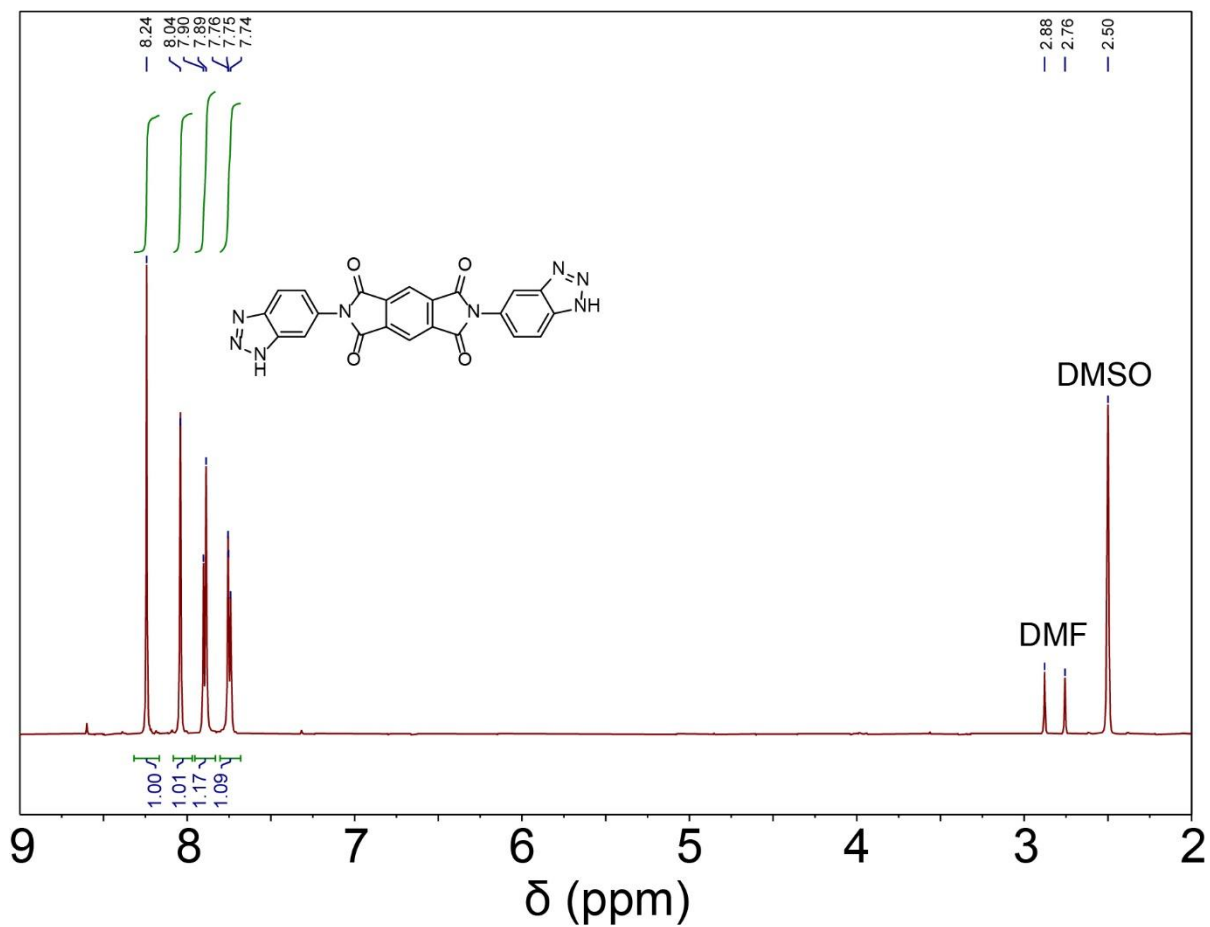

**Figure S16.**  $^1\text{H}$  NMR spectrum of  $\text{H}_2\text{bbt-PMDI}$ .

The sample was dissolved in trifluoroacetic acid and several drops of  $\text{DMSO-}d_6$  were added to the solution to provide a lock signal for shimming.

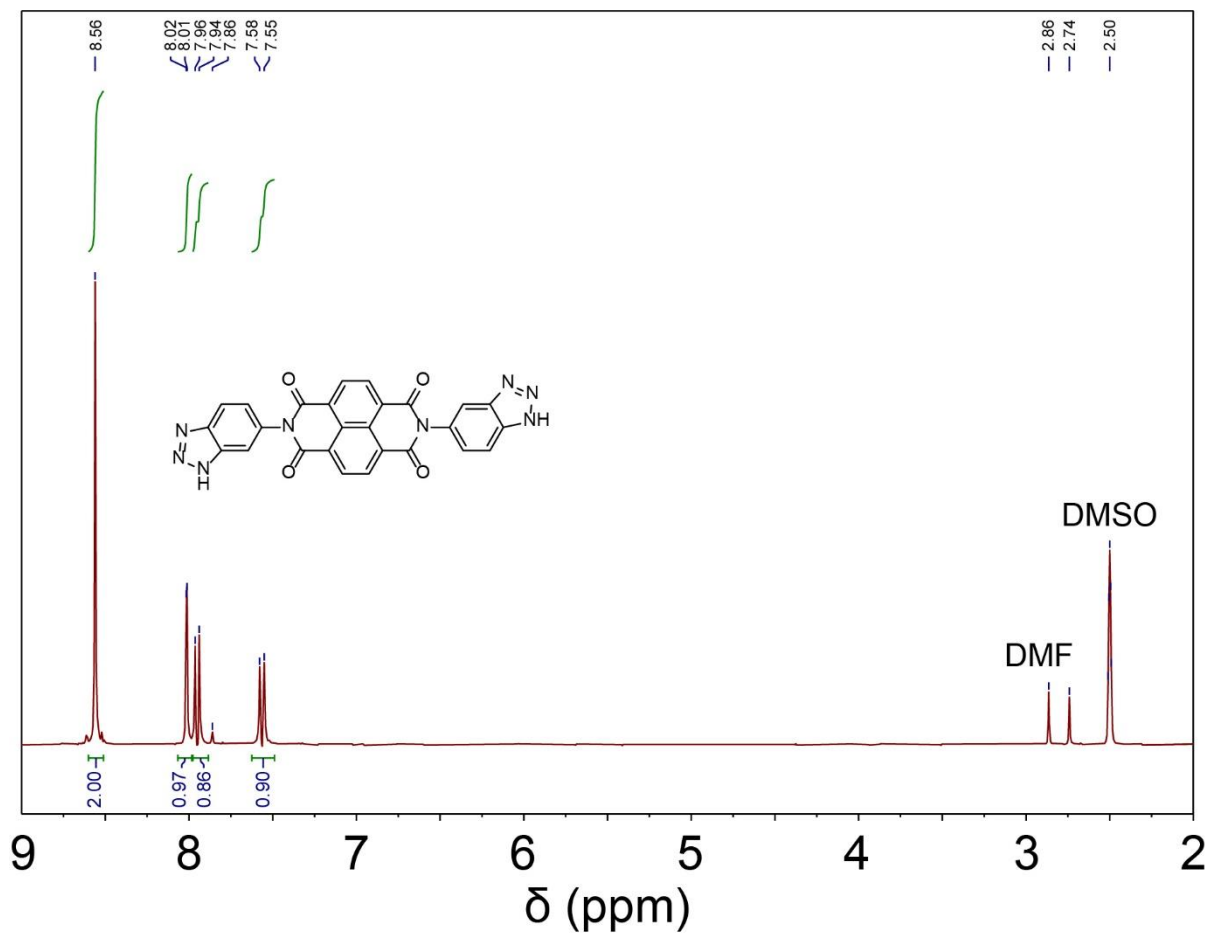

**Figure S17.**  $^1\text{H}$  NMR spectrum of H<sub>2</sub>bbt-NDI.

The sample was dissolved in trifluoroacetic acid. Several drops of DMSO- $d_6$  were added to the solution to provide a lock signal for shimming.

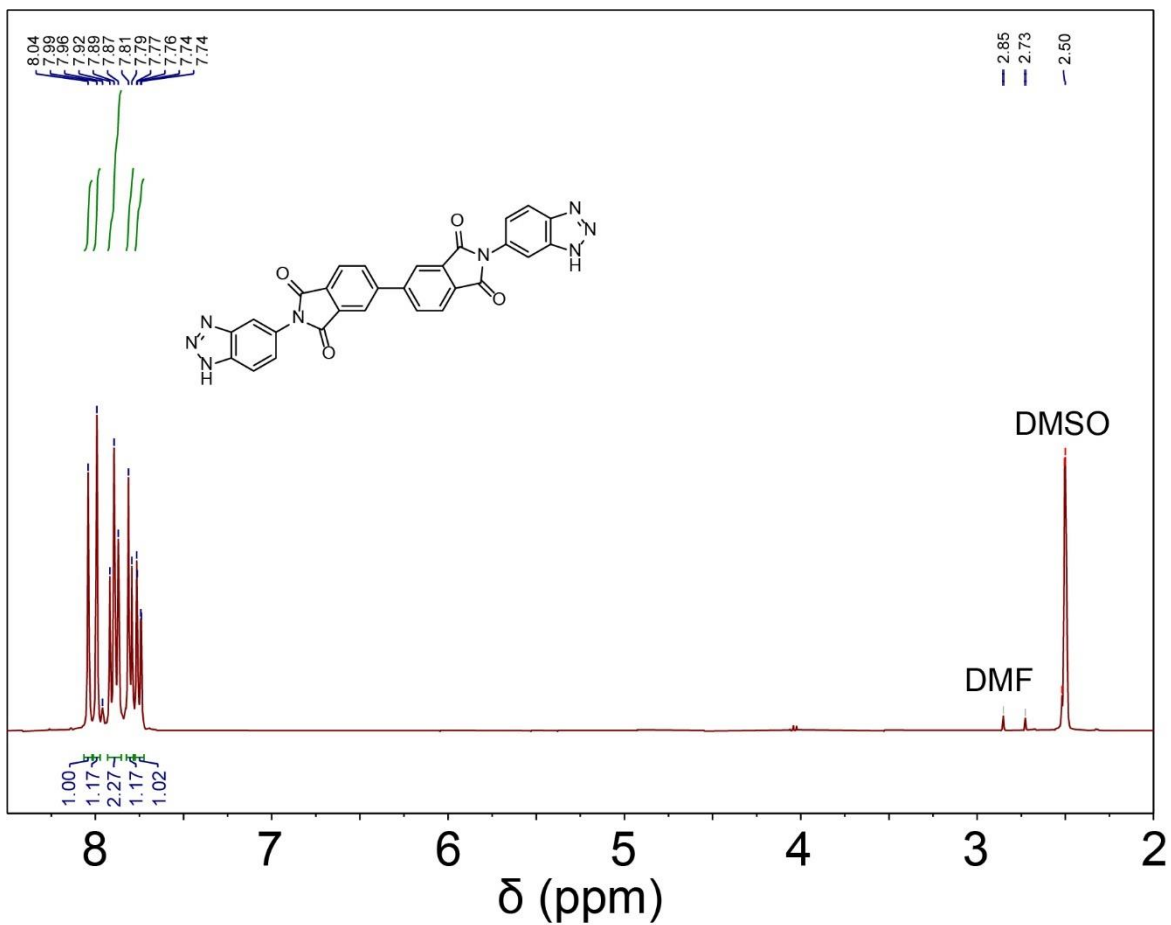

**Figure S18.**  $^1\text{H}$  NMR spectrum of  $\text{H}_2\text{bbt-BPDI}$ . The sample was dissolved in trifluoroacetic acid and several drops of  $\text{DMSO-}d_6$  were added to the solution to provide a lock signal for shimming.

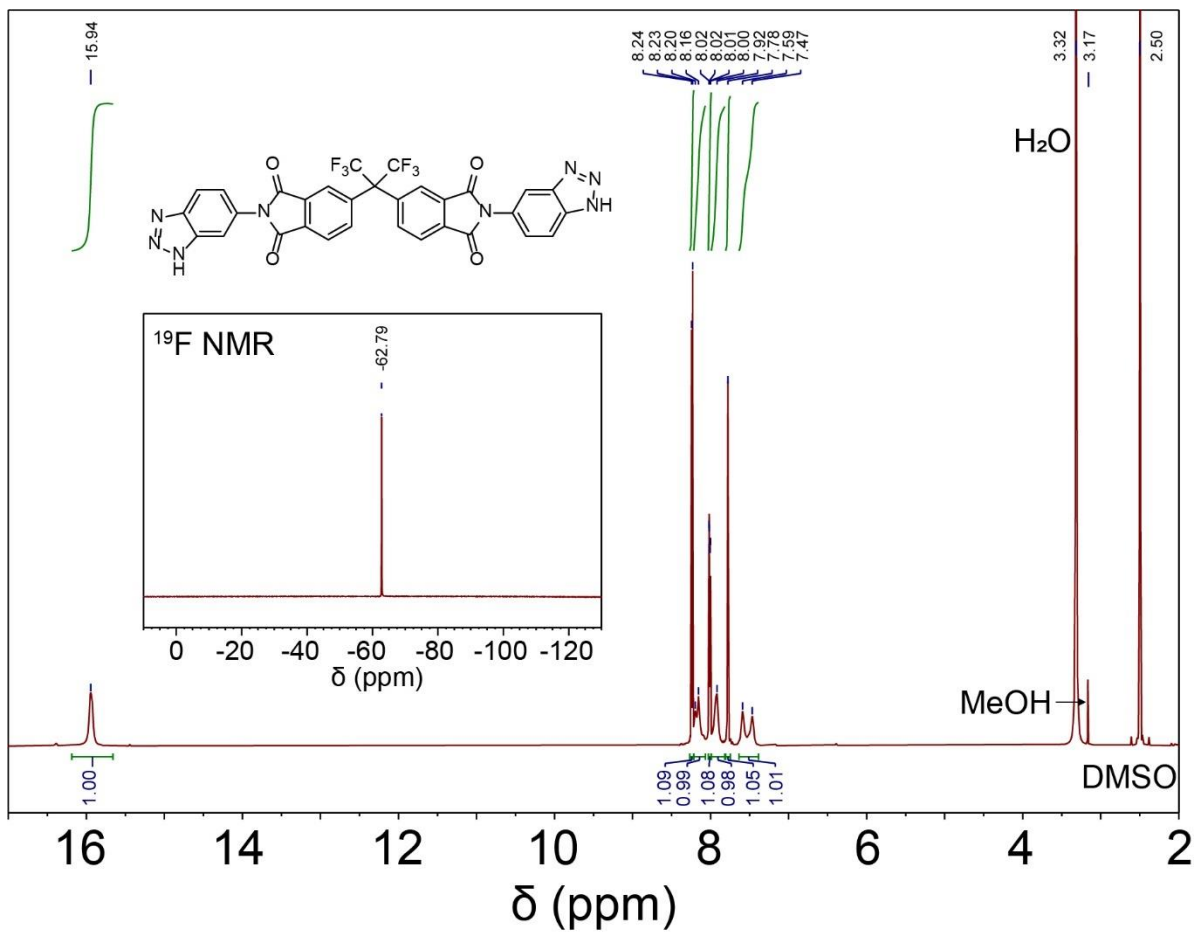

**Figure S19.**  $^1\text{H}$  NMR and  $^{19}\text{F}$  NMR spectra of H<sub>2</sub>bbt-HFIPI. The sample was dissolved in DMSO-*d*<sub>6</sub>.

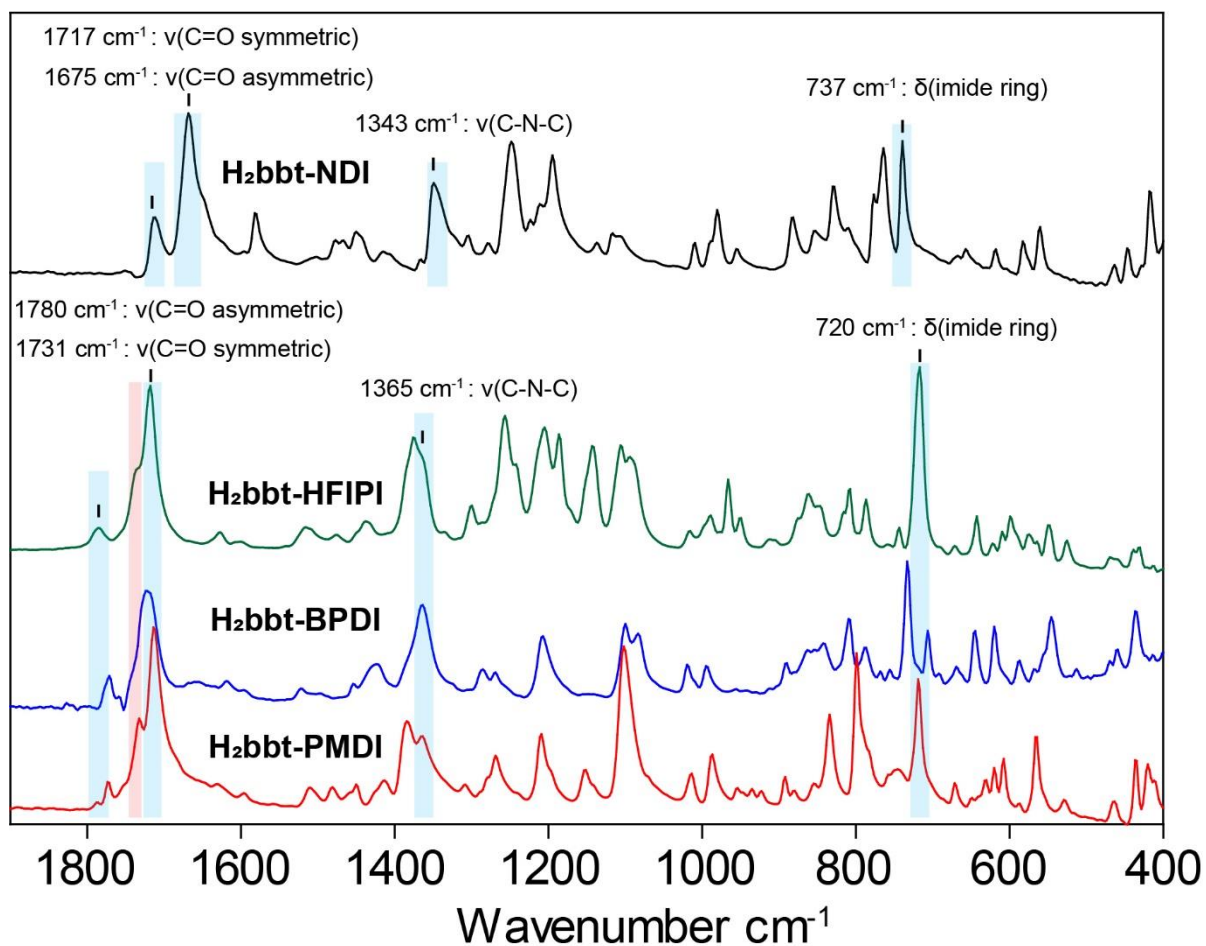

**Figure S20.** ATR-IR spectra of H<sub>2</sub>bbt-XDI linkers (XDI = NDI, HFIPI, BPDI, PMDI). IR bands associated with the imide groups are highlighted in blue and the C=O stretching mode (1732  $\text{cm}^{-1}$ ) of residual DMF solvent is highlighted in red.

### Part 3: Characterization data for 2-XDI MOFs

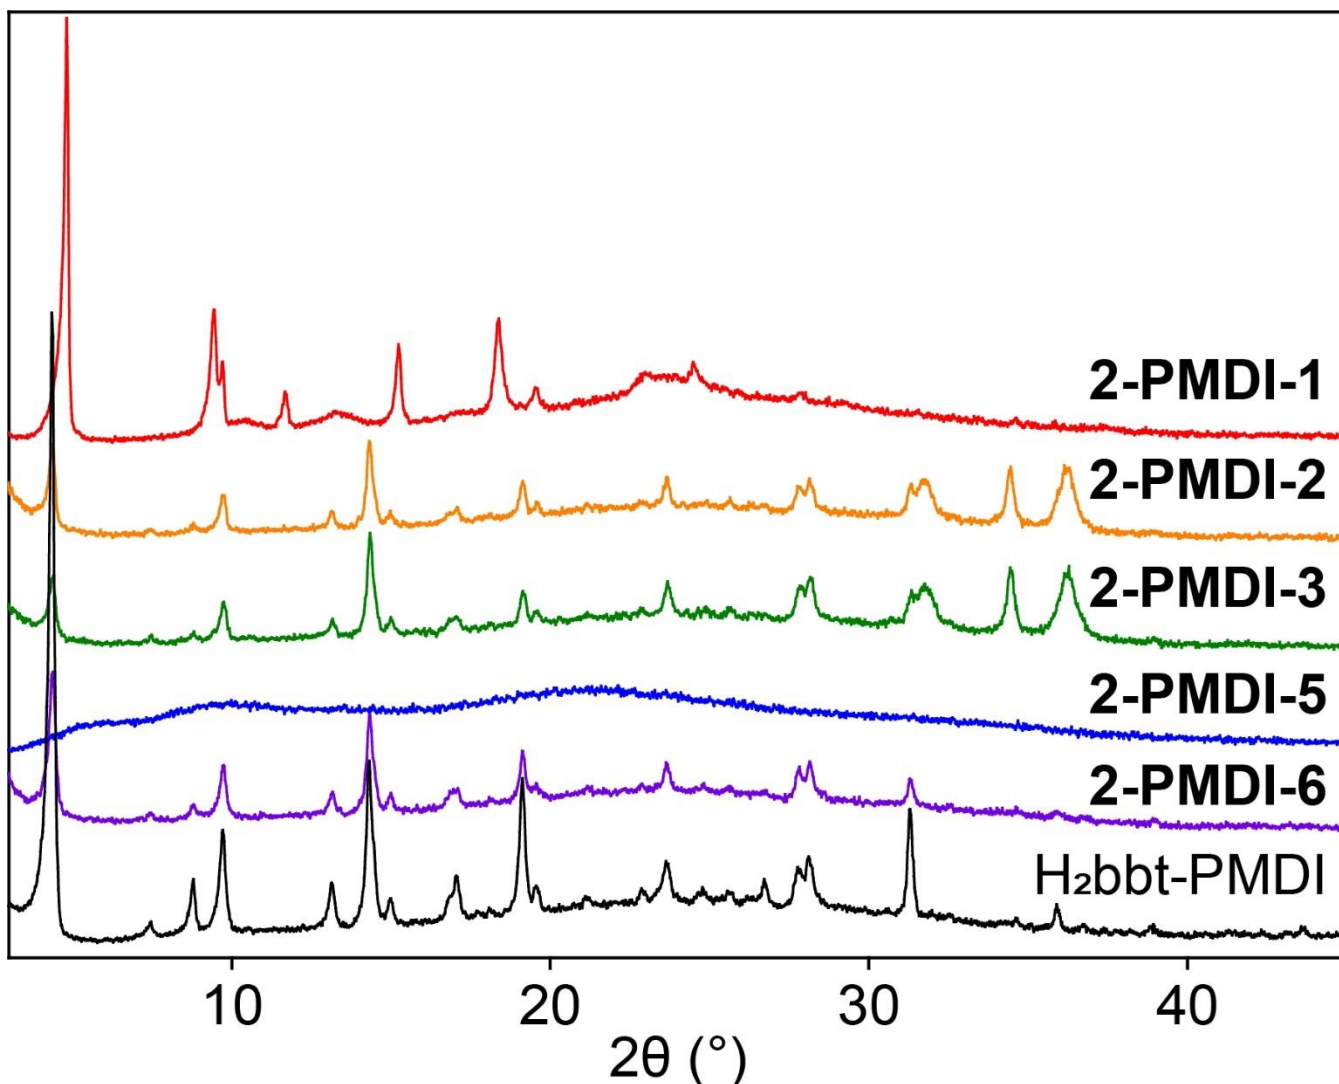

**Figure S21.** Overlay of the PXRD patterns of solid products obtained from **2-PMDI-n** solvothermal screening reactions.

The overlay shows crystalline H<sub>2</sub>bbt-PMDI linker and precipitated solids from solvothermal screening reactions with H<sub>2</sub>bbt-PMDI. See Table 1 for the corresponding solvothermal reaction conditions (i.e. **2-PMDI-n**,  $n = 1-6$ ).

*Screening results:* Only condition 1 (**2-PMDI-1**) yielded a unique crystalline phase. Conditions 2, 3, and 6 gave the crystalline H<sub>2</sub>bbt-PMDI linker phase. Condition 5 yielded an amorphous solid. Condition 1 was used for large scale synthesis and characterization of **2-PMDI**.

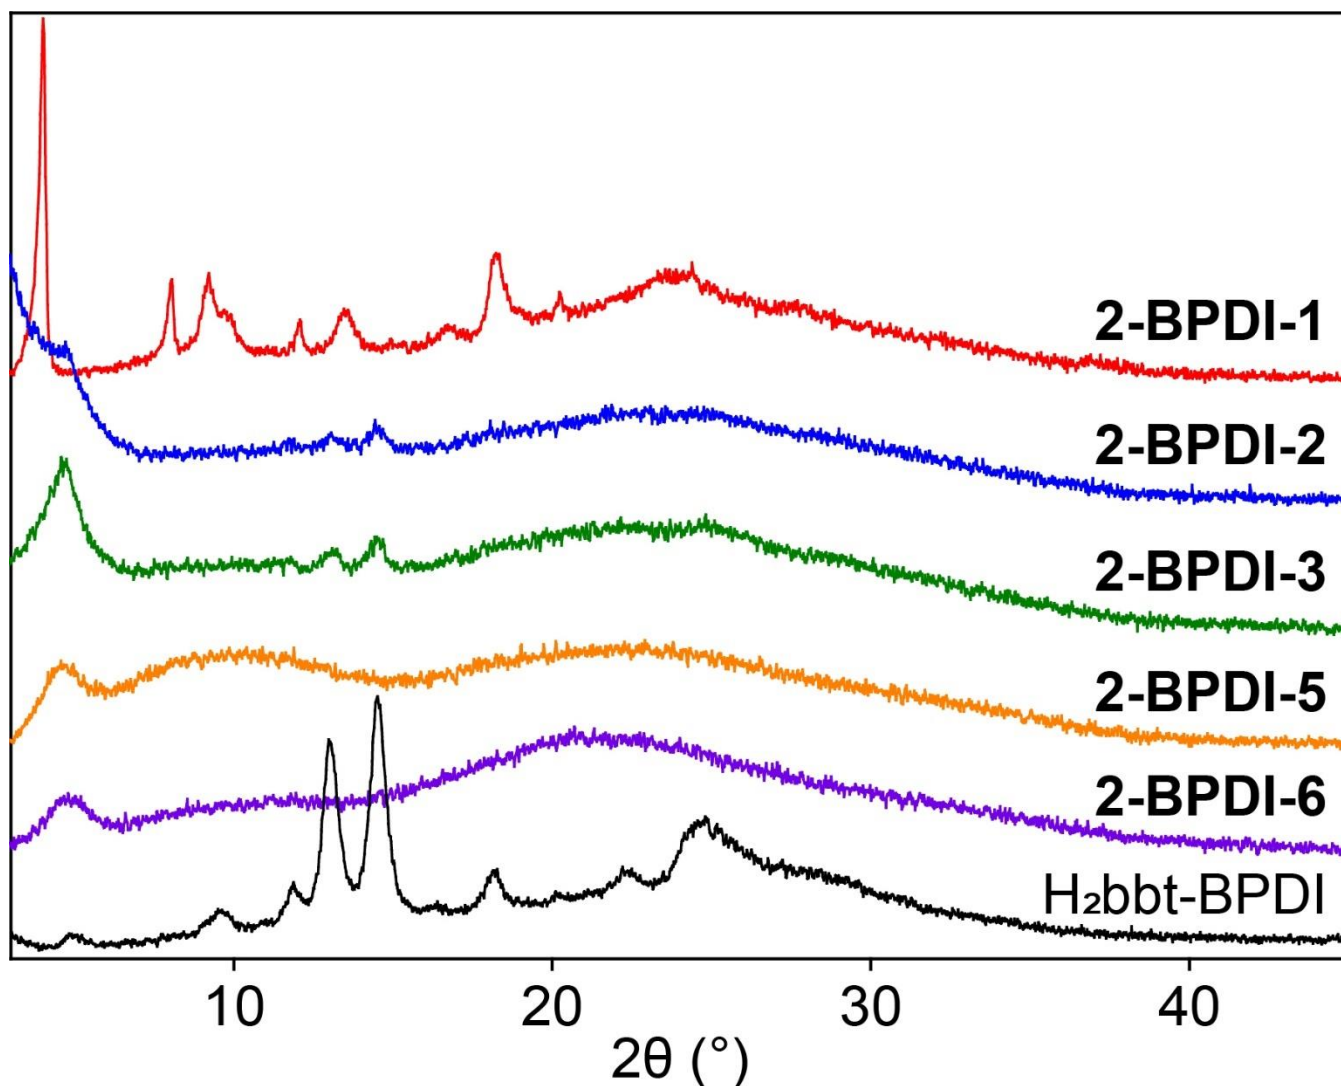

**Figure S22.** Overlay of the PXRD patterns of solid products obtained from **2-BPDI-n** solvothermal screening reactions.

The overlay shows crystalline H<sub>2</sub>bbt-BPDI linker and precipitated solids from solvothermal screening reactions with H<sub>2</sub>bbt-BPDI. See Table 1 for the corresponding solvothermal reaction conditions (i.e. **2-BPDI-n**, n = 1-6).

*Screening results:* A colorless powder was isolated from reaction condition 1 (**2-BPDI-1**) and XRD shows that a poorly crystalline phase is present. The crystalline **H<sub>2</sub>bbt-BPDI** linker phase was observed for conditions 2 and 3, and both of the resulting solids had a light orange color. Conditions 5 and 6 yielded flocculent white solids. Condition 1 was chosen for large scale synthesis and characterization of **2-BPDI**.

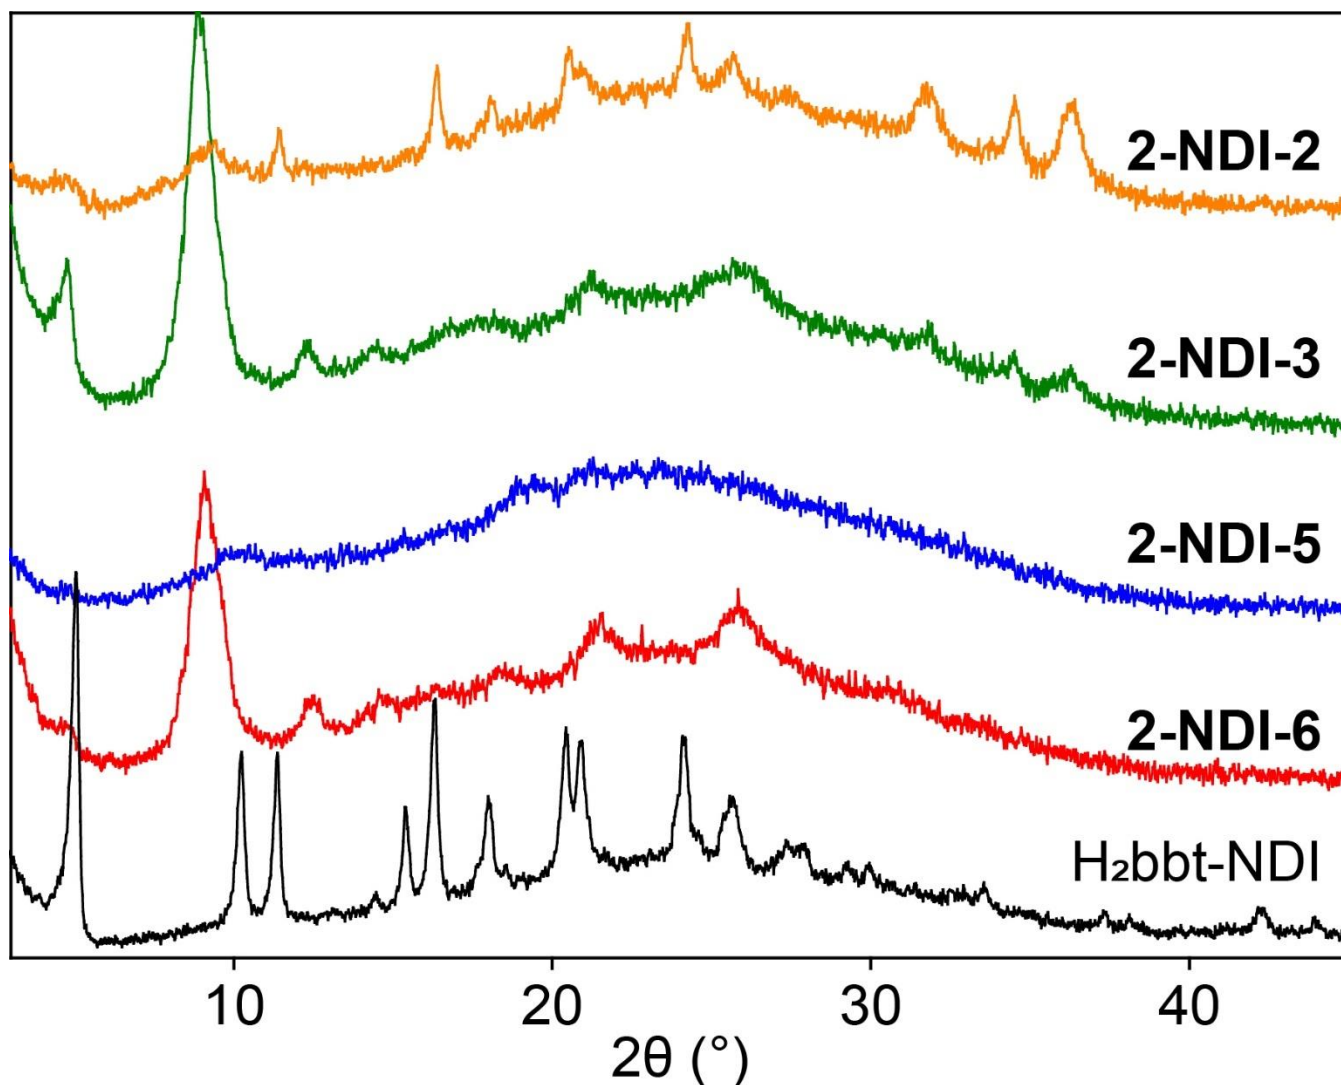

**Figure S23.** Overlay of the PXRD patterns of solid products obtained from **2-NDI-n** solvothermal screening reactions.

The overlay shows crystalline H<sub>2</sub>bbt-NDI linker and precipitated solids from solvothermal screening reactions with H<sub>2</sub>bbt-NDI. See Table 1 for the corresponding solvothermal reaction conditions (i.e. **2-NDI-n**, n = 1-6).

*Screening results:* No solid was observed in reactions using conditions 1 and 4. The crystalline **H<sub>2</sub>bbt-NDI** linker phase was observed for condition 2. Conditions 3 and 6 yielded flocculent, dark brown solids that are poorly crystalline. Condition 5 (**2-NDI-5**) yielded a bright yellow solid, although PXRD shows that it is amorphous. Condition 5 was used for large scale synthesis and characterization of the **2-NDI** MOF. Condition 3 and 6 were not chosen for large scale synthesis because the dark brown color of these compounds indicates that the naphthalene diimide groups had been reduced under the solvothermal conditions.<sup>15</sup>



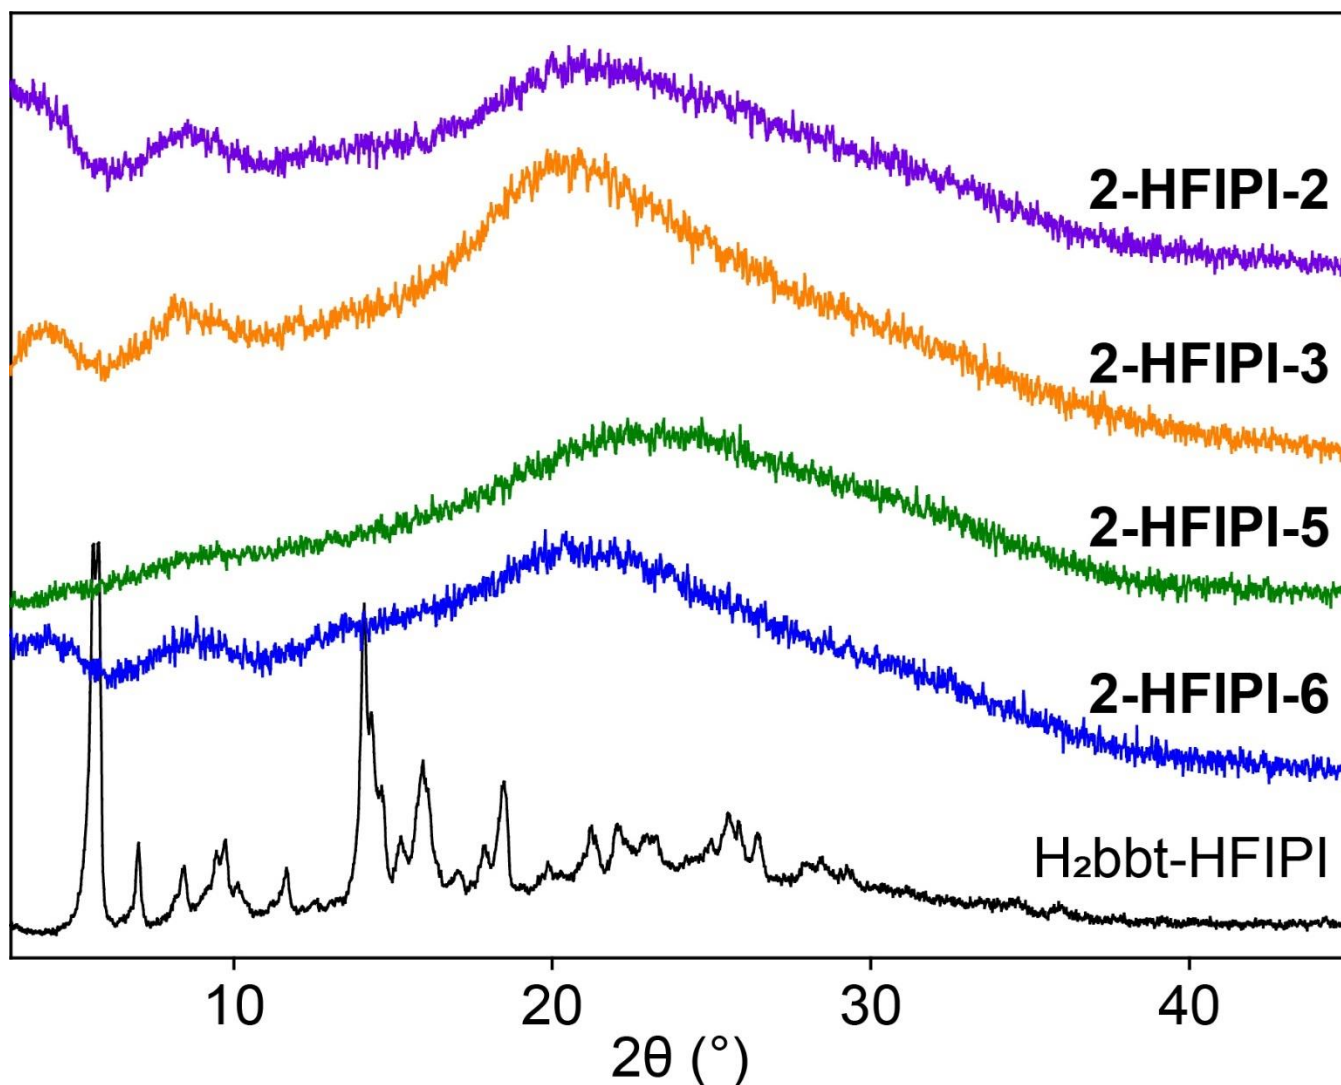

**Figure S24.** Overlay of the PXRD patterns of solid products obtained from **2-HFIPI-n** solvothermal screening reactions. The overlay shows crystalline **H<sub>2</sub>bbt-HFIPI** linker and precipitated solids from solvothermal screening reactions with **H<sub>2</sub>bbt-HFIPI**. See Table 1 for the corresponding solvothermal reaction conditions (i.e. **2-HFIPI-n**, n = 1-6).

*Screening results:* No precipitate was observed for conditions 1 and 4. All other conditions yielded flocculent white solids. None of the resulting solids show the presence of the crystalline **H<sub>2</sub>bbt-HFIPI** linker phase. Condition 5 was chosen for large scale synthesis and characterization of **2-HFIPI**. Condition 6 was not chosen since base facilitated the hydrolysis of the **H<sub>2</sub>bbt-HFIPI** linker. Conditions 2 and 3 were not chosen since the chloride-based Zn precursor provides a better comparison to the **1-XDI** MOFs which also contains chloride as X-type ligand in the **1-NH<sub>2</sub>** clusters.

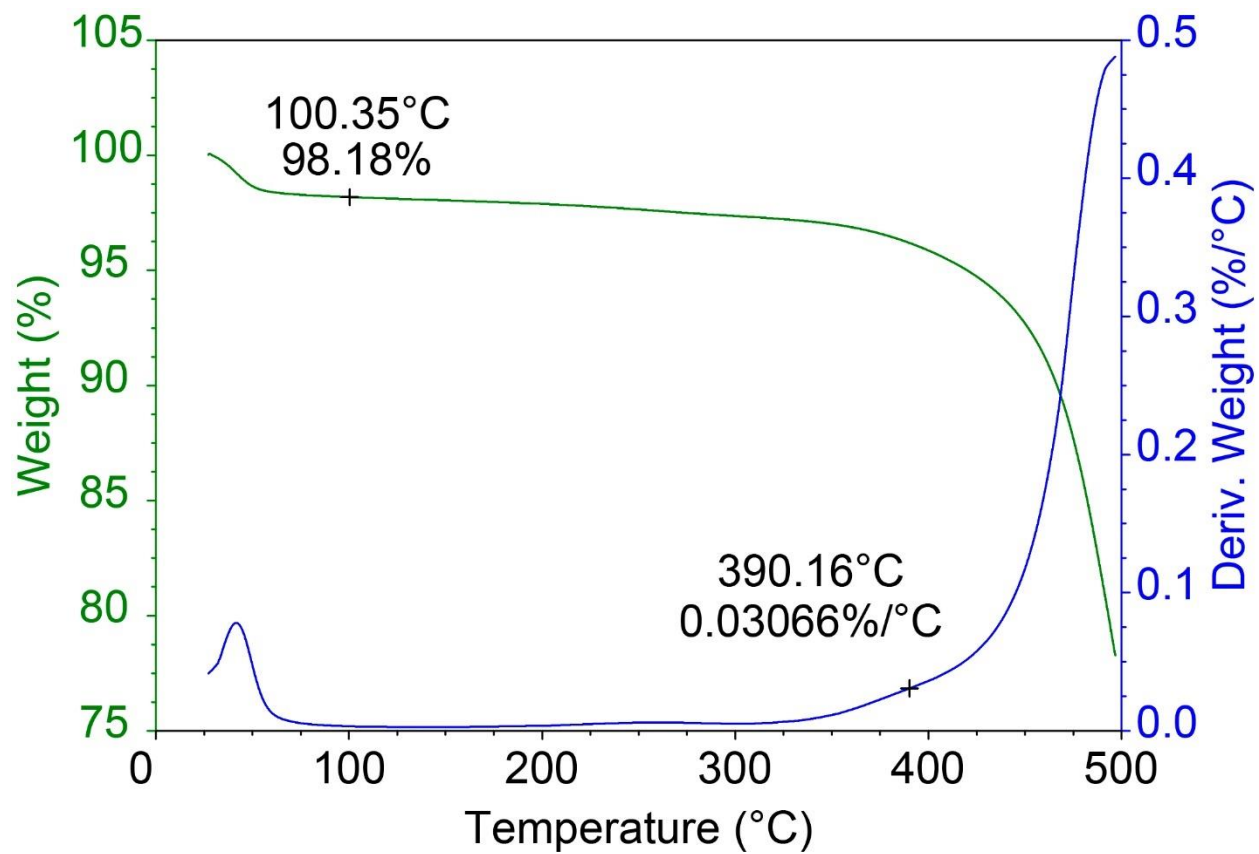

**Figure S25.** Thermogravimetric analysis data for activated **2-PMDI**.

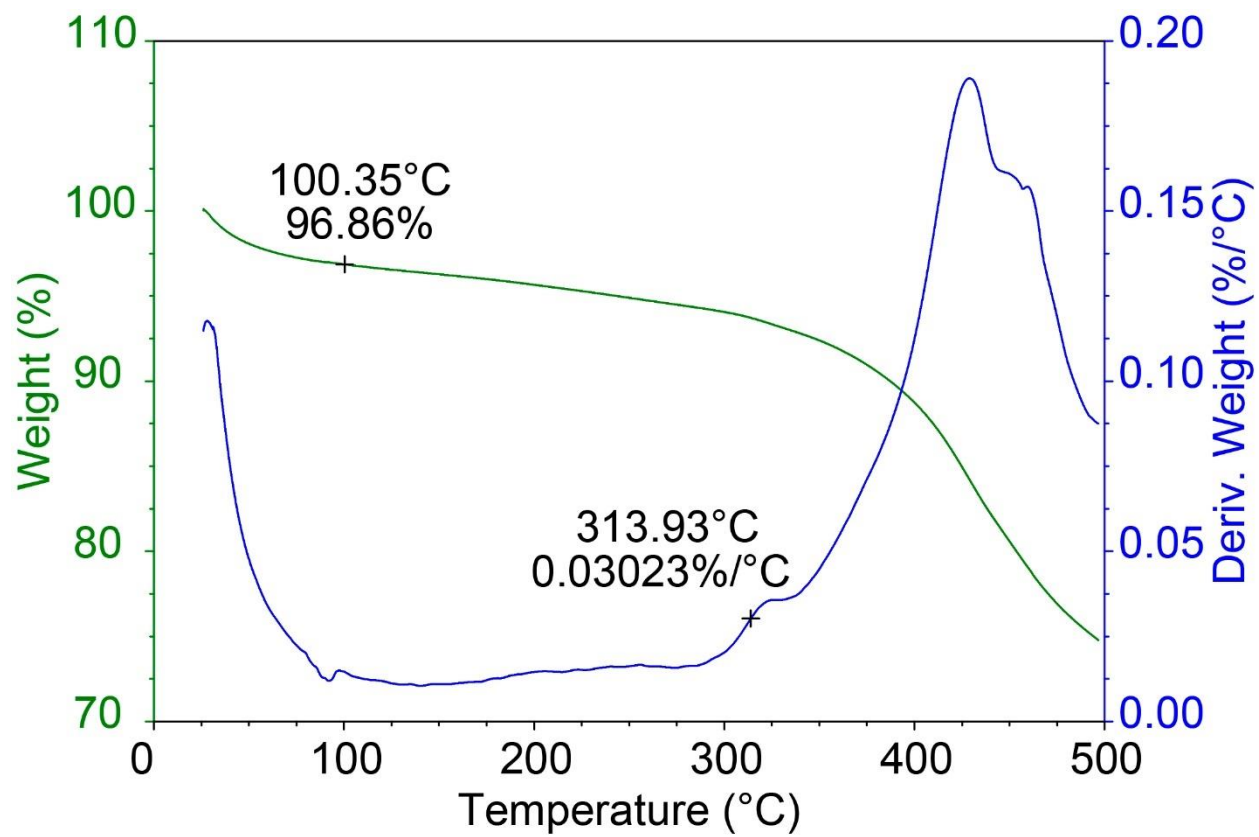

Figure S26. Thermogravimetric analysis data for activated 2-NDI.

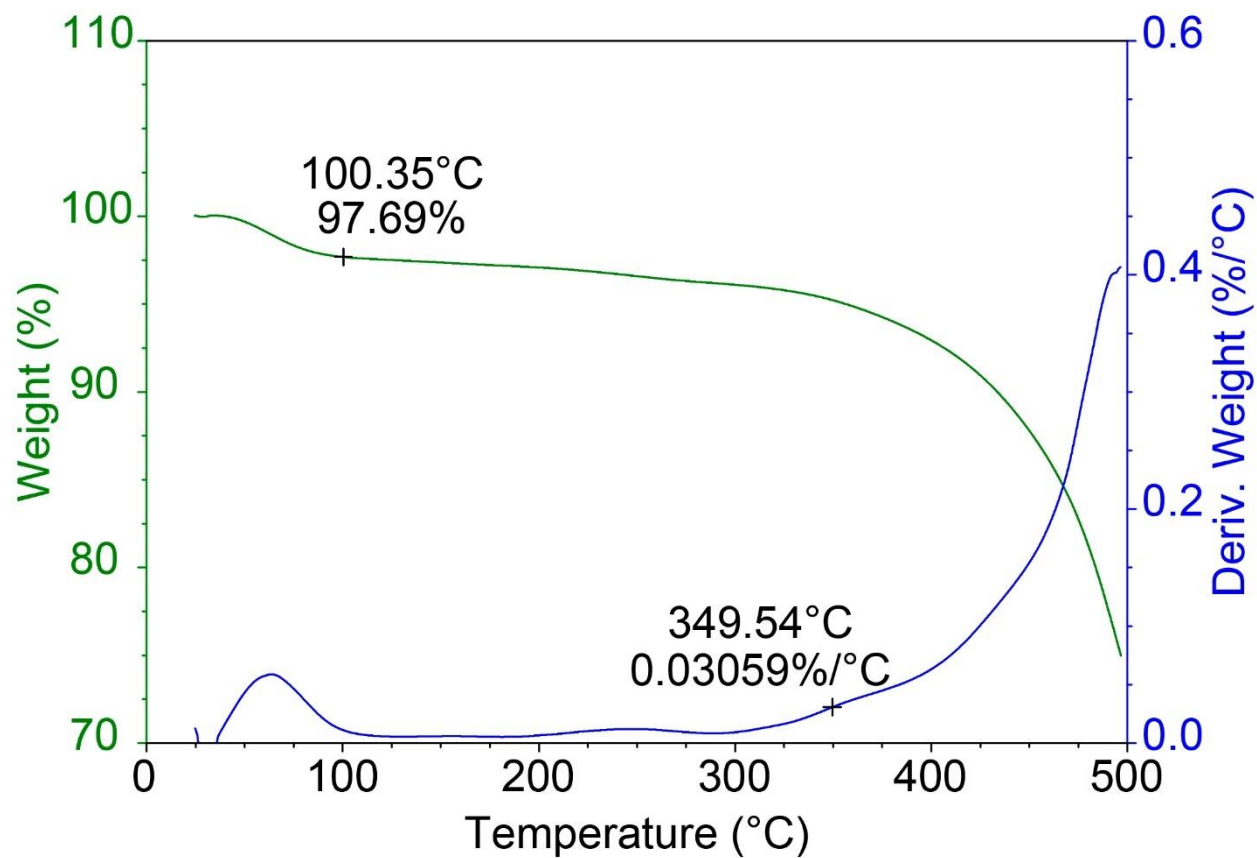

**Figure S27.** Thermogravimetric analysis data for activated **2-BPDI**.

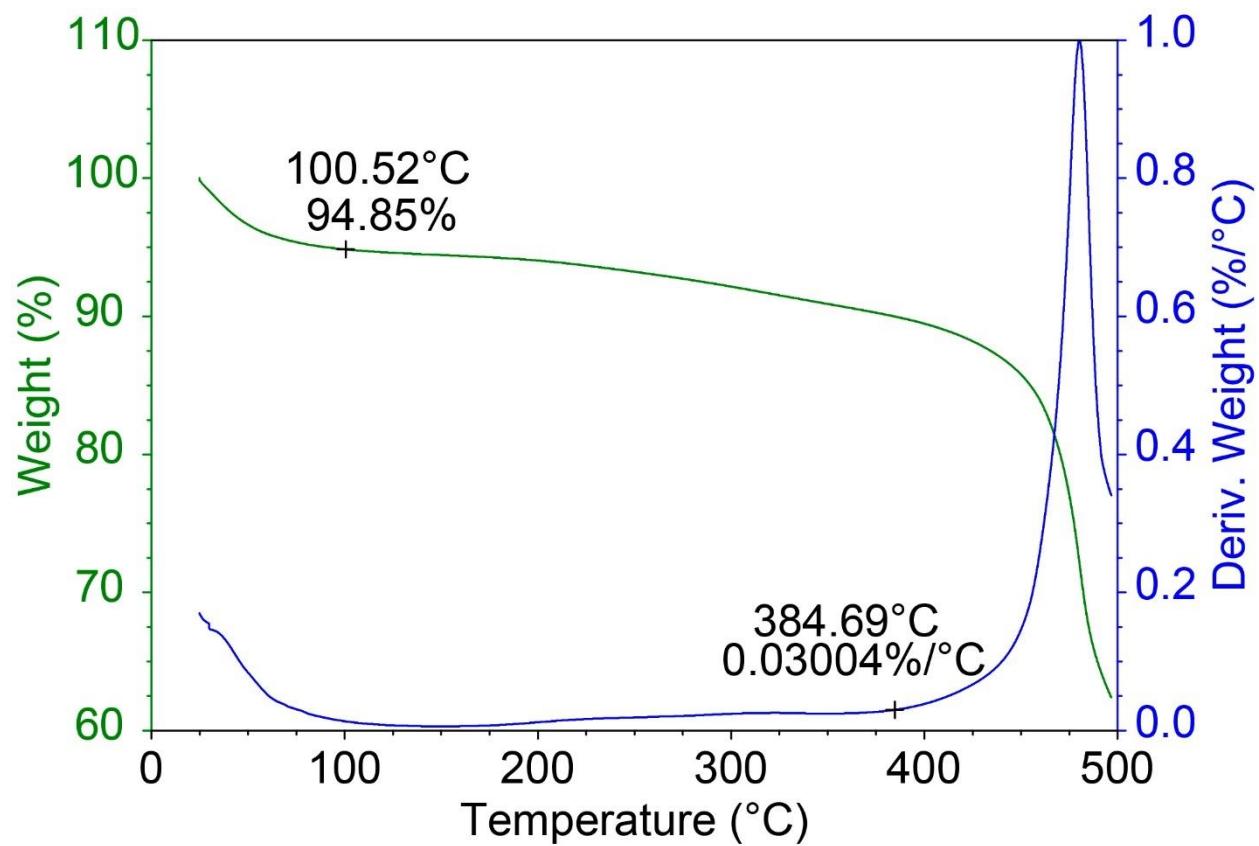

**Figure S28.** Thermogravimetric analysis data for activated **2-HFIPI**.

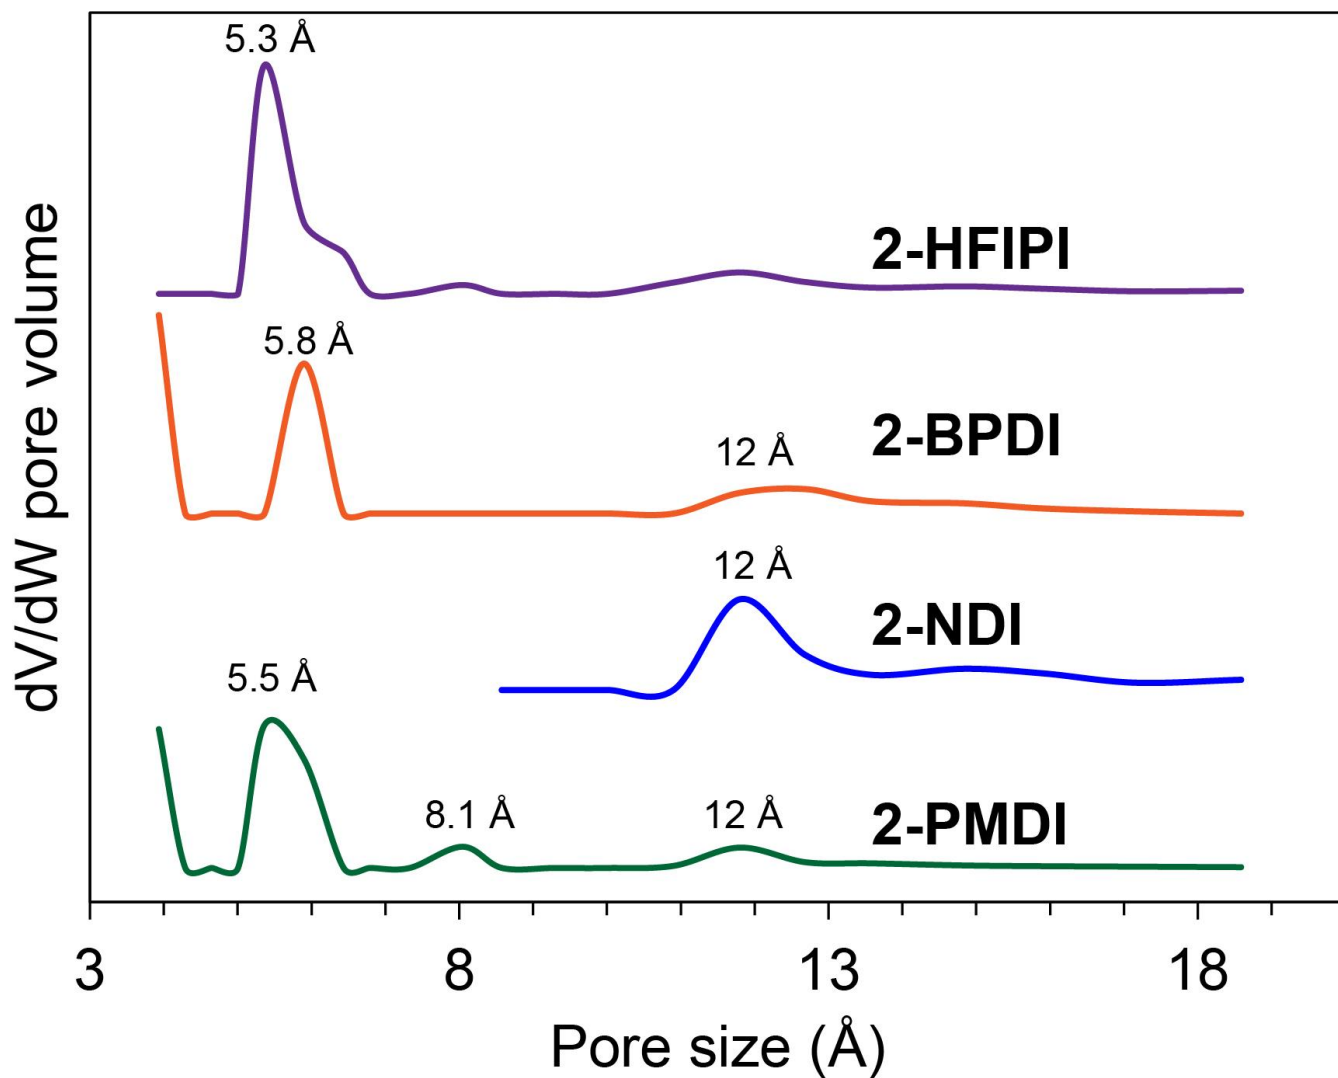

**Figure S29.** DFT pore size distributions for the **2-XDI** MOFs.

The **2-XDI** MOFs show the presence of small micropores around 5-6 Å and a smaller volume fraction of micropores with ~12 Å diameter. The presence of relatively small micropores and the similarity in pore size distribution for these materials despite the different linker length indicate that they likely adopt interpenetrated structures.

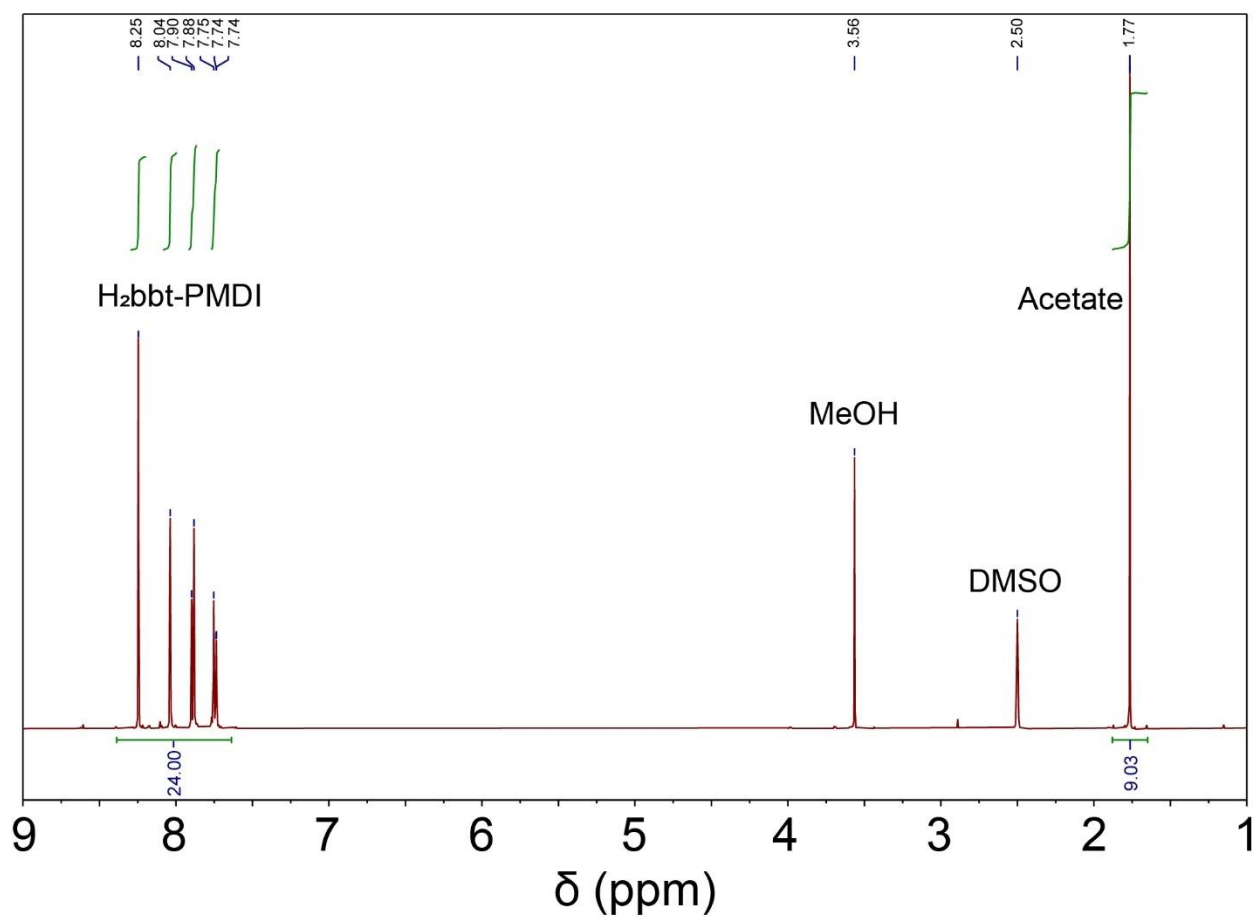

**Figure S30.** Acid-digested  $^1\text{H}$  NMR spectrum of **2-PMDI**.

Samples were digested for solution-state  $^1\text{H}$  NMR analysis by suspending  $\sim 5$  mg of solid in  $\text{CF}_3\text{CO}_2\text{H}$  (1 mL) and gently heating the suspensions until all the solids dissolved.  $\text{DMSO-}d_6$  (0.1 mL) was then added to the solutions to provide a lock signal for shimming.

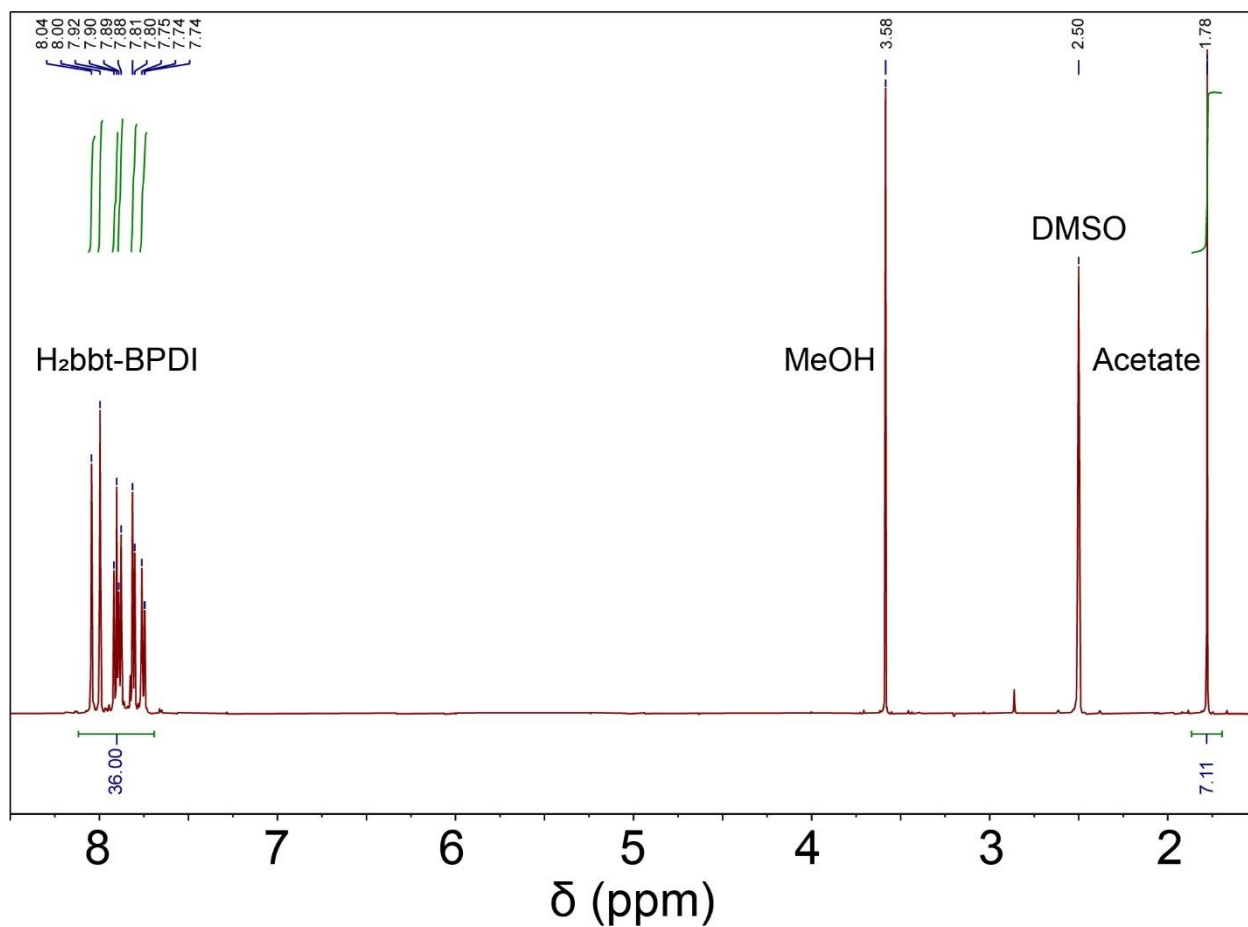

**Figure S31.** Acid-digested <sup>1</sup>H NMR spectrum of **2-BPDI**.

Samples were digested for solution-state <sup>1</sup>H NMR analysis by suspending ~5 mg of solid in CF<sub>3</sub>CO<sub>2</sub>H (1 mL) and gently heating the suspensions until all the solids dissolved. DMSO-*d*<sub>6</sub> (0.1 mL) was then added to the solutions to provide a lock signal for shimming.



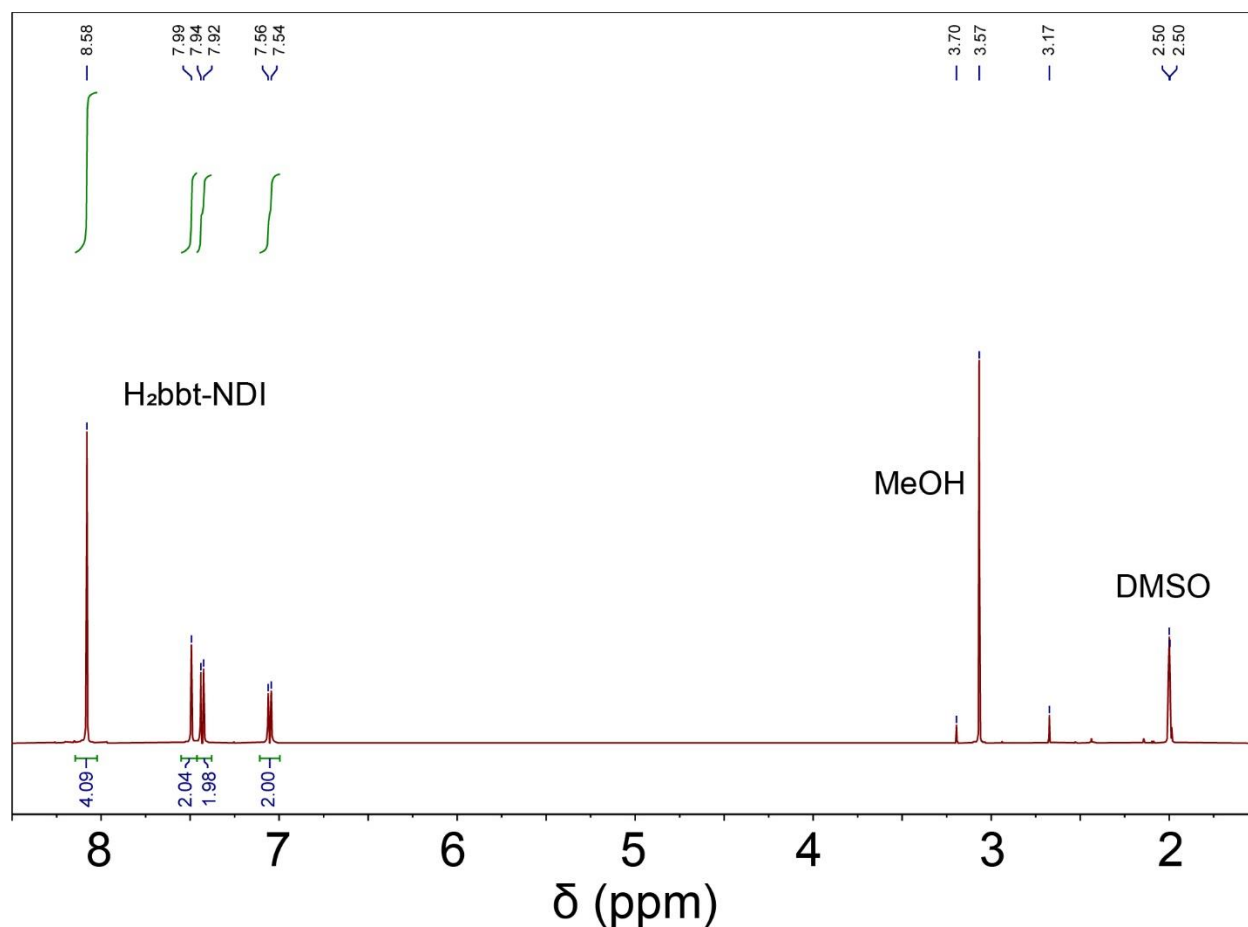

**Figure S32.** Acid-digested  $^1\text{H}$  NMR spectrum of **2-NDI**.

Samples were digested for solution-state  $^1\text{H}$  NMR analysis by suspending  $\sim 5$  mg of solid in  $\text{CF}_3\text{CO}_2\text{H}$  (1 mL) and gently heating the suspensions until all the solids dissolved.  $\text{DMSO-}d_6$  (0.1 mL) was then added to the solutions to provide a lock signal for shimming.

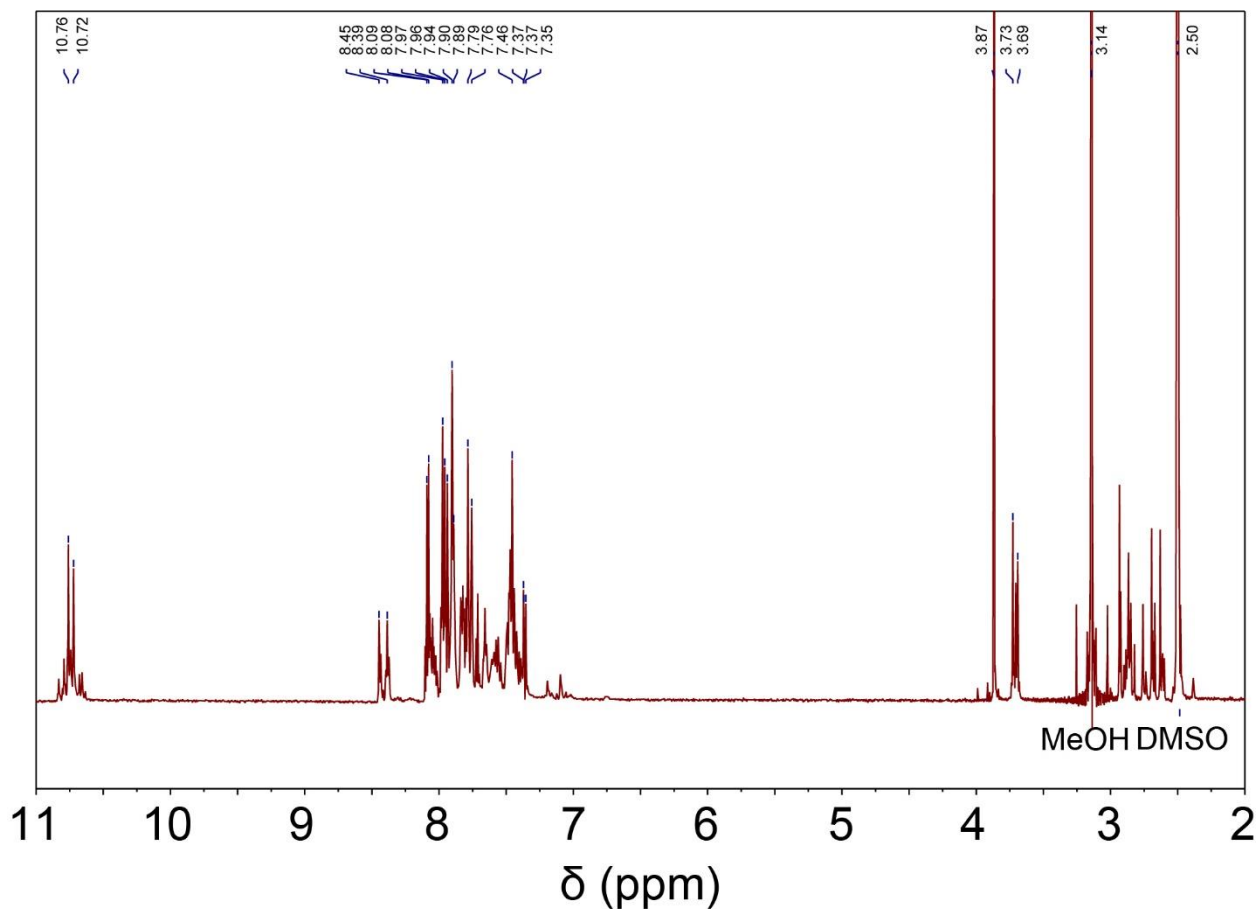

**Figure S33.** Acid-digested  $^1\text{H}$  NMR spectrum of **2-HFIPI**.

Samples were digested for solution-state  $^1\text{H}$  NMR analysis by suspending  $\sim 5$  mg of solid in  $\text{CF}_3\text{CO}_2\text{H}$  (1 mL) and gently heating the suspensions until all the solids dissolved.  $\text{DMSO-}d_6$  (0.1 mL) was then added to the solutions to provide a lock signal for shimming.

The bbt-HFIPI $^{2-}$  linkers undergo hydrolysis to form amide/carboxylate species during the MOF solvothermal synthesis reaction. As a result, the  $\text{H}_2\text{bbt-HFIPI}$  diimide species are not clearly observed in the  $^1\text{H}$  NMR spectrum. The ATR-IR spectrum of **2-HFIPI** (Figure S34) confirms the presence of hydrolyzed linker species as the major products.

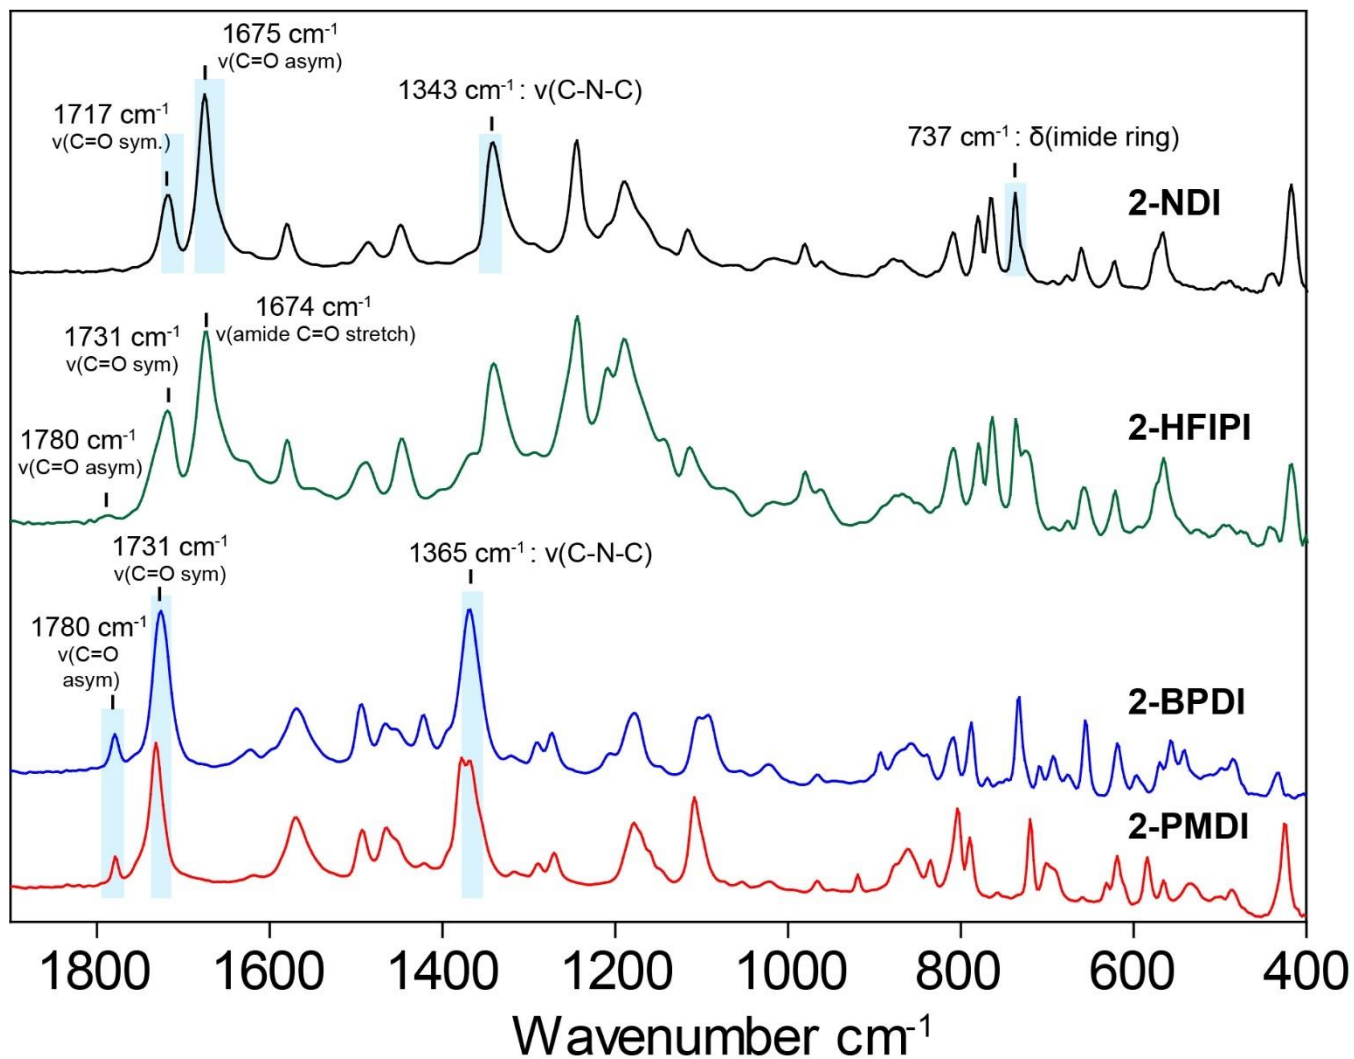

**Figure S34.** ATR-IR spectra of 2-XDI MOFs. IR bands associated with the imide groups are highlighted in blue.

#### Part 4: Attempted structural characterization of crystalline 1-PMDI and 2-XDI samples.

PXRD data for **2-PMDI**, **2-BPDI** and **1-PMDI** (Figure S35) were obtained using a Bruker D8 Advance powder diffractometer (Cu K $\alpha$  radiation,  $\lambda = 1.5418 \text{ \AA}$ ). The TOPAS-Academic (version 6) software package was used to attempt to index the patterns. Owing to the poor crystallinity of **1-PMDI**, we were unable to select a suitable number of reflections for indexing, hindering any further analysis of the data. For **2-PMDI** and **2-BPDI**, less than 20 reflections were found to be suitable for indexing each pattern and the unit cells could not be identified with any reasonable degree of confidence. Based on the estimated linker lengths and Zn...Zn distances (Table S12 and Figure S36), the unit cell volumes could be larger than  $50,000 \text{ \AA}^3$ . PXRD indexing software such as Topas is typically only capable of generating results with cell volumes smaller than  $20,000 \text{ \AA}^3$ . Consequently, we attempted to determine the structures of **1-PMDI**, **2-PMDI**, and **2-BPDI** using Micro-Electron Diffraction (Micro-ED, Figure S37). The TEM images show irregular shaped particles that tended to aggregate and ranged in size from 100 nm to 1  $\mu\text{m}$ . Over 40 particles were inspected for each sample, but well-defined single crystallites could not be located. Electron diffraction patterns of the particles showed weak diffraction and/or smearing of the reflections indicative of a polycrystalline particle.

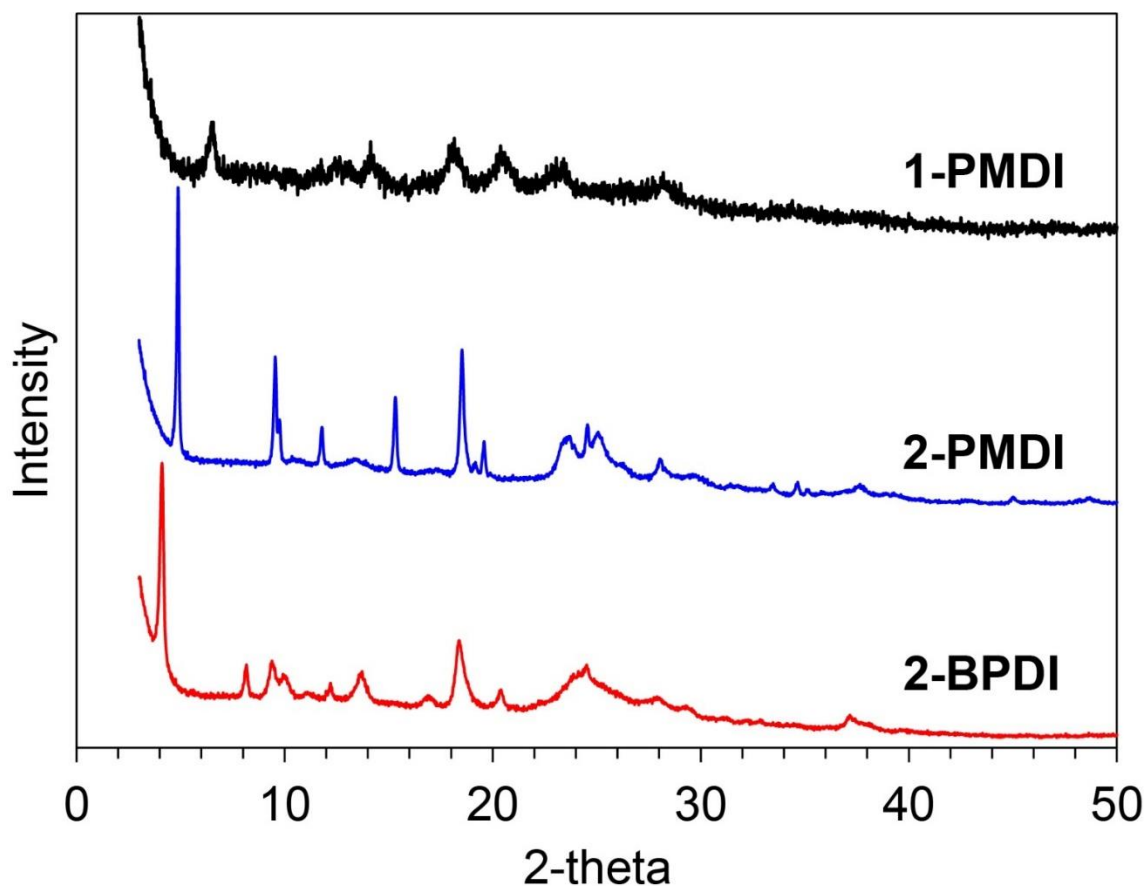

**Figure S35.** Overlay of PXRD patterns measured for **1-PMDI**, **2-PMDI**, and **2-BPDI**.

**Table S12.** Correlation between the  $Zn_c$ – $Zn_c$  distance and the unit cell volume in **2-PMDI**, **2-BPDI**, and some known bis-benzotriazolate-based MOFs.

| Benzotriazolate MOF name | $Zn_c$ – $Zn_c$ distance (Å) | Space group        | Unit cell volume (Å <sup>3</sup> ) | References |
|--------------------------|------------------------------|--------------------|------------------------------------|------------|
| MFU-4                    | 10.8                         | $F\bar{m}3\bar{m}$ | 10114                              | 16         |
| MFU-4l                   | 15.5                         | $F\bar{m}3\bar{m}$ | 29955                              | 17         |
| CFA-7                    | 20.4                         | $R\bar{3}m$        | 49704                              | 18         |
| <b>2-PMDI</b>            | 21.86-22.60                  | Unknown            | Unknown                            | -          |
| <b>2-BPDI</b>            | 20.55-25.86                  | Unknown            | Unknown                            | -          |

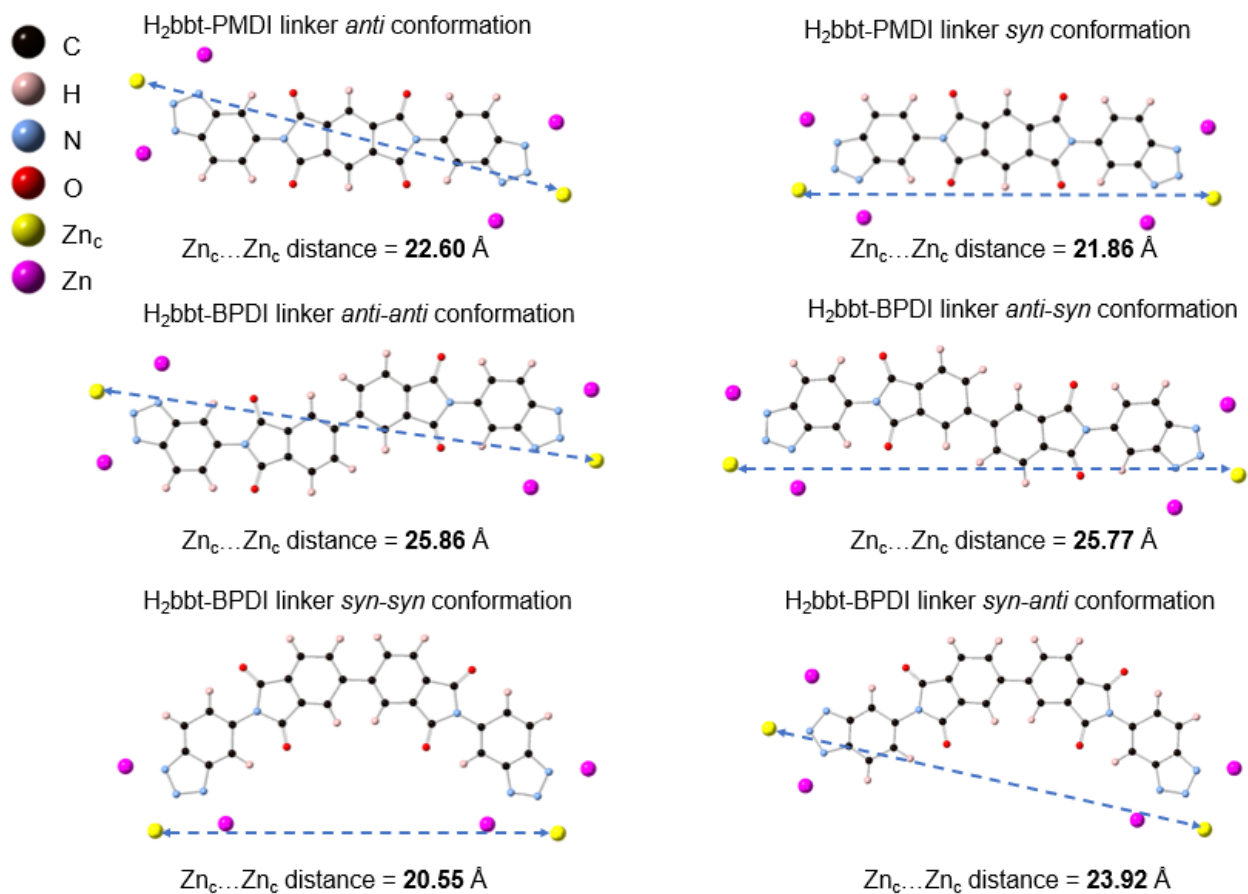

**Figure S36.** Possible linker conformations and estimated  $Zn \dots Zn$  distances for **2-PMDI** and **2-BPDI** MOFs.

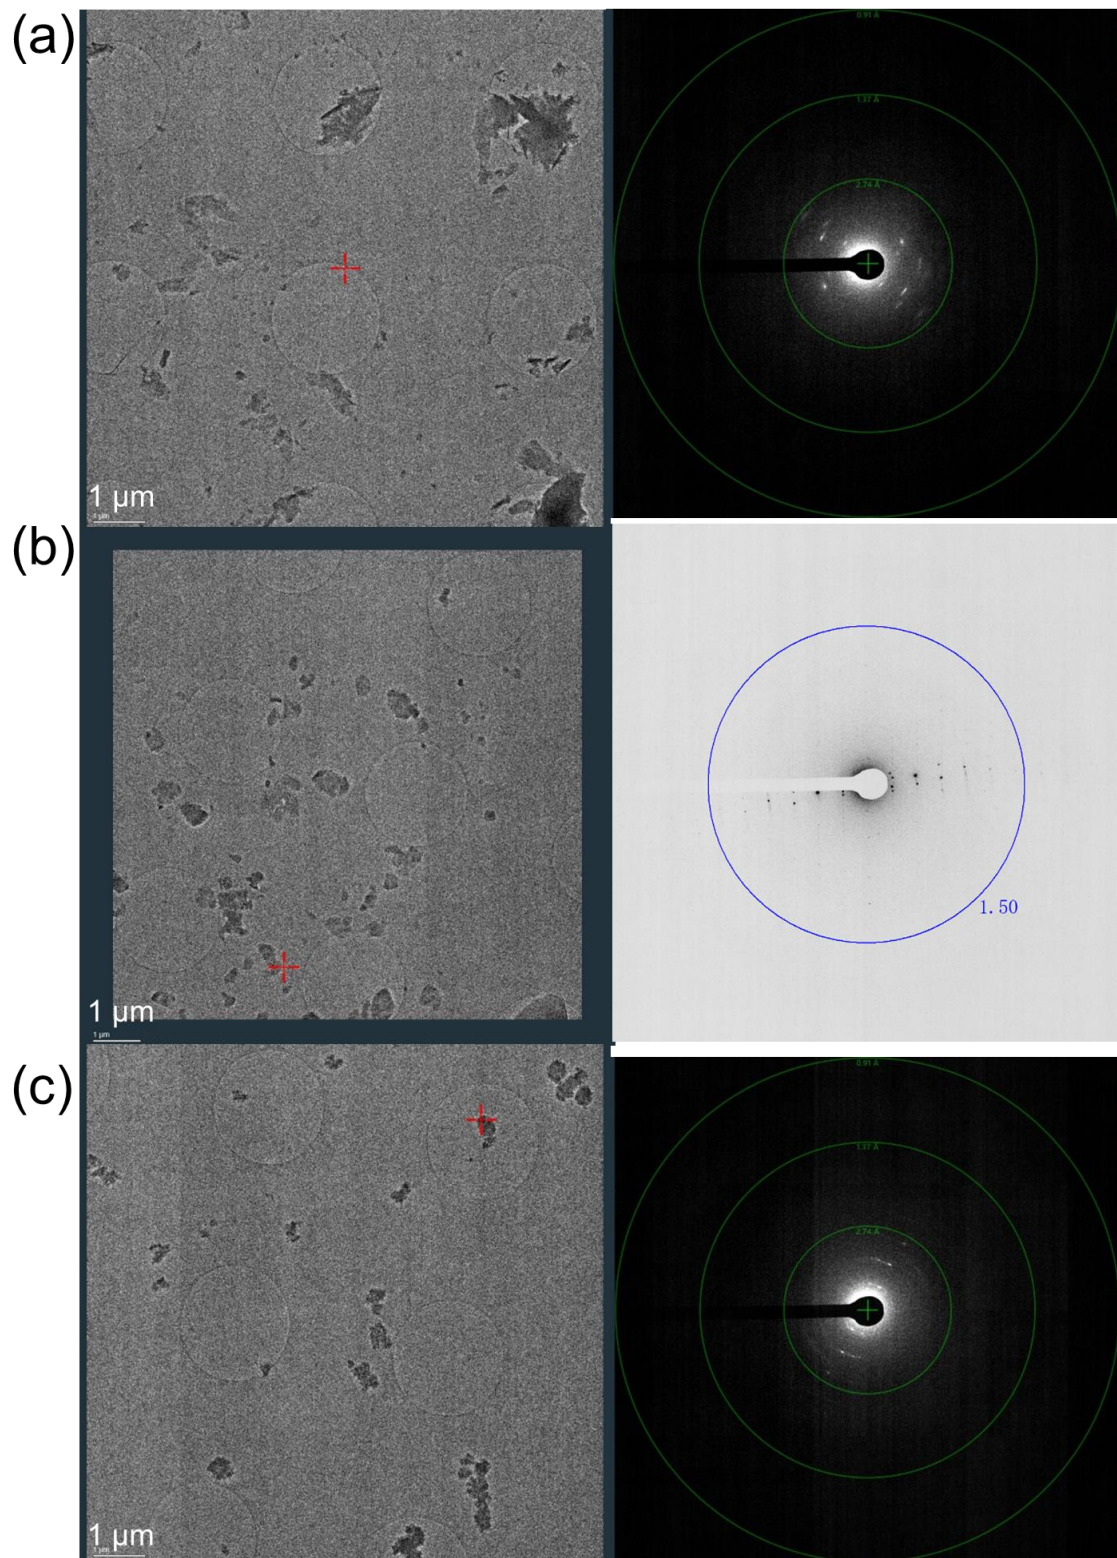

**Figure S37.** TEM image (left) and electron diffraction images (right) of selected crystals of (a) 1-PMDI, (b) 2-PMDI and (c) 2-BPDI MOFs and with improved sample preparation.

**Part 5: Gas adsorption data and binary gas mixture selectivity for 1-XDI and 2-XDI MOFs.**

**Table S13.** Predicted IAST selectivity for binary equimolar gas mixtures (1 bar, 300 K) for the 1-XDI MOFs.

| Sample/Gas                                                                                                                                                                                                        | C <sub>2</sub> H <sub>2</sub> /CO <sub>2</sub> | C <sub>2</sub> H <sub>4</sub> /C <sub>2</sub> H <sub>6</sub> * | C <sub>3</sub> H <sub>6</sub> /C <sub>3</sub> H <sub>8</sub> |
|-------------------------------------------------------------------------------------------------------------------------------------------------------------------------------------------------------------------|------------------------------------------------|----------------------------------------------------------------|--------------------------------------------------------------|
| <b>1-PMDI</b>                                                                                                                                                                                                     | 1.5                                            | -                                                              | 2.8                                                          |
| <b>1-NDI</b>                                                                                                                                                                                                      | 2.8                                            | -                                                              | 1.8                                                          |
| <b>1-BPDI</b>                                                                                                                                                                                                     | 2.3                                            | -                                                              | 1.7                                                          |
| <b>1-HFIPI</b>                                                                                                                                                                                                    | 2.9                                            | -                                                              | 1.9                                                          |
| *The isotherm data for the <b>1-XDI</b> MOFs do not display any selectivity for C <sub>2</sub> H <sub>4</sub> /C <sub>2</sub> H <sub>6</sub> separation, so the IAST selectivity values have not been calculated. |                                                |                                                                |                                                              |

**Table S14.** Predicted IAST selectivity for binary equimolar gas mixtures (1 bar, 300 K) for the 2-XDI MOFs.

| Sample/Gas                                                                                                                                                                                                                                                            | C <sub>2</sub> H <sub>2</sub> /CO <sub>2</sub> | C <sub>2</sub> H <sub>4</sub> /C <sub>2</sub> H <sub>6</sub> | C <sub>3</sub> H <sub>6</sub> /C <sub>3</sub> H <sub>8</sub> |
|-----------------------------------------------------------------------------------------------------------------------------------------------------------------------------------------------------------------------------------------------------------------------|------------------------------------------------|--------------------------------------------------------------|--------------------------------------------------------------|
| <b>2-PMDI</b>                                                                                                                                                                                                                                                         | 3.4                                            | 2.4                                                          | 10.5                                                         |
| <b>2-NDI</b>                                                                                                                                                                                                                                                          | 3.3                                            | 1.1                                                          | 2.6                                                          |
| <b>2-BPDI</b>                                                                                                                                                                                                                                                         | 2.3                                            | 1.3                                                          | 6.0                                                          |
| <b>2-HFIPI</b>                                                                                                                                                                                                                                                        | 2.6                                            | 1.3*                                                         | 1.5                                                          |
| * <b>2-HFIPI</b> shows a slight inverse selectivity for adsorption of C <sub>2</sub> H <sub>6</sub> over C <sub>2</sub> H <sub>4</sub> , and the corresponding C <sub>2</sub> H <sub>6</sub> /C <sub>2</sub> H <sub>4</sub> selectivity value is listed in the table. |                                                |                                                              |                                                              |

**Table S15.** Adsorption capacities (mmol/g) at 1 bar for C<sub>1</sub>-C<sub>3</sub> gases in 1-XDI MOFs.<sup>a</sup>

| Sample/Gas     | CO <sub>2</sub> | C <sub>2</sub> H <sub>2</sub> | C <sub>2</sub> H <sub>4</sub> | C <sub>2</sub> H <sub>6</sub> | C <sub>3</sub> H <sub>6</sub> | C <sub>3</sub> H <sub>8</sub> |
|----------------|-----------------|-------------------------------|-------------------------------|-------------------------------|-------------------------------|-------------------------------|
| <b>1-PMDI</b>  | 0.27            | 0.30                          | 0.09                          | 0.07                          | 0.11                          | 0.07                          |
| <b>1-NDI</b>   | 1.38            | 1.79                          | 1.21                          | 1.16                          | 1.78                          | 1.53                          |
| <b>1-BPDI</b>  | 1.32            | 1.63                          | 1.20                          | 1.18                          | 1.68                          | 1.42                          |
| <b>1-HFIPI</b> | 1.45            | 1.89                          | 1.32                          | 1.27                          | 1.77                          | 1.47                          |

**Table S16.** Adsorption capacities (mmol/g) at 1 bar for C<sub>1</sub>-C<sub>3</sub> gases in 2-XDI MOFs.<sup>a</sup>

| Sample/Gas     | CO <sub>2</sub> | C <sub>2</sub> H <sub>2</sub> | C <sub>2</sub> H <sub>4</sub> | C <sub>2</sub> H <sub>6</sub> | C <sub>3</sub> H <sub>6</sub> | C <sub>3</sub> H <sub>8</sub> |
|----------------|-----------------|-------------------------------|-------------------------------|-------------------------------|-------------------------------|-------------------------------|
| <b>2-PMDI</b>  | 1.36            | 1.31                          | 1.04                          | 0.89                          | 1.11                          | 0.90                          |
| <b>2-NDI</b>   | 1.09            | 1.31                          | 0.85                          | 0.76                          | 1.24                          | 0.94                          |
| <b>2-BPDI</b>  | 1.33            | 1.63                          | 1.24                          | 1.11                          | 1.62                          | 1.32                          |
| <b>2-HFIPI</b> | 1.46            | 1.87                          | 1.25                          | 1.43                          | 1.90                          | 1.67                          |

<sup>a</sup> Uptake (mmol/g) at 300 K and 1 bar.

**Table S17.** Summary of gas adsorption properties and C<sub>3</sub>H<sub>6</sub>/C<sub>3</sub>H<sub>8</sub> selectivity of some reported MOFs.

| MOF Material                                          | C <sub>3</sub> H <sub>6</sub> Capacity (mmol/g) | C <sub>3</sub> H <sub>8</sub> Capacity (mmol/g) | Capacity C <sub>3</sub> H <sub>6</sub> /C <sub>3</sub> H <sub>8</sub> | IAST selectivity | Reference |
|-------------------------------------------------------|-------------------------------------------------|-------------------------------------------------|-----------------------------------------------------------------------|------------------|-----------|
| 1-NDI                                                 | 1.78                                            | 1.53                                            | 1.2                                                                   | 1.8              | -         |
| 1-BPDI                                                | 1.68                                            | 1.42                                            | 1.2                                                                   | 1.7              | -         |
| 1-HFIPI                                               | 1.77                                            | 1.47                                            | 1.2                                                                   | 1.9              | -         |
| 2-PMDI                                                | 1.11                                            | 0.90                                            | 1.2                                                                   | 10.5             | -         |
| 2-NDI                                                 | 1.24                                            | 0.94                                            | 1.3                                                                   | 2.6              | -         |
| 2-BPDI                                                | 1.62                                            | 1.32                                            | 1.2                                                                   | 6.0              | -         |
| 2-HFIPI                                               | 1.90                                            | 1.67                                            | 1.1                                                                   | 1.5              | -         |
| Zn <sub>9</sub> (OH) <sub>6</sub> (bbtm) <sub>6</sub> | 4.08                                            | 3.49                                            | 1.2                                                                   | 1.1              | 19        |
| AGTU-3a                                               | 1.22                                            | 0.46                                            | 2.7                                                                   | 7.0              | 20        |
| MAF-23-O                                              | 1.38                                            | 1.02                                            | 1.3                                                                   | 8.8              | 21        |
| Ni-NP                                                 | 3.57                                            | 2.13                                            | 1.7                                                                   | 10.5             | 22        |
| Ni-MOF-74                                             | 4.85                                            | 4.00                                            | 1.2                                                                   | 10               | 23        |
| Mn <sub>2</sub> (m-dobdc)                             | 7.23                                            | 5.92                                            | 1.2                                                                   | 43               | 24        |
| Fe <sub>2</sub> (m-dobdc)                             | 7.31                                            | 5.92                                            | 1.2                                                                   | 60               | 24        |
| Co <sub>2</sub> (m-dobdc)                             | 7.55                                            | 6.04                                            | 1.3                                                                   | 38               | 24        |
| Ni <sub>2</sub> (m-dobdc)                             | 7.33                                            | 6.06                                            | 1.2                                                                   | 35               | 24        |
| Co-gallate                                            | 1.79                                            | 0.14                                            | 12.8                                                                  | 333              | 25        |
| UTSA-400                                              | 4.42                                            | 0.12                                            | 36.8                                                                  | >10 <sup>7</sup> | 26        |

[#] all reported conditions are under 298 K and 1 bar, equimolar selectivity.



**Table S18.** Summary of gas adsorption properties and C<sub>2</sub>H<sub>2</sub>/CO<sub>2</sub> selectivity of some reported MOFs.

| MOF or Polymer Material                                                                                  | CO <sub>2</sub> Capacity (mmol/g) | C <sub>2</sub> H <sub>2</sub> Capacity (mmol/g) | Capacity C <sub>2</sub> H <sub>2</sub> /CO <sub>2</sub> | IAST selectivity | Reference |
|----------------------------------------------------------------------------------------------------------|-----------------------------------|-------------------------------------------------|---------------------------------------------------------|------------------|-----------|
| <b>1-NDI</b>                                                                                             | 1.38                              | 1.79                                            | 1.3                                                     | 2.8              | -         |
| <b>1-BPDI</b>                                                                                            | 1.32                              | 1.63                                            | 1.2                                                     | 2.3              | -         |
| <b>1-HFIPI</b>                                                                                           | 1.45                              | 1.89                                            | 1.3                                                     | 2.9              | -         |
| <b>2-PMDI</b>                                                                                            | 1.36                              | 1.31                                            | 1.0                                                     | 3.4              | -         |
| <b>2-NDI</b>                                                                                             | 1.09                              | 1.31                                            | 1.2                                                     | 3.3              | -         |
| <b>2-BPDI</b>                                                                                            | 1.33                              | 1.63                                            | 1.2                                                     | 2.3              | -         |
| <b>2-HFIPI</b>                                                                                           | 1.46                              | 1.87                                            | 1.3                                                     | 2.6              | -         |
| CuI@UiO-66-(COOH) <sub>2</sub>                                                                           | 1.70                              | 2.31                                            | 1.4                                                     | 185.0            | 27        |
| Cu <sub>2</sub> (ATC)<br>(ATC-Cu)                                                                        | 4.02                              | 5.01                                            | 1.2                                                     | 53.6             | 28        |
| Ni <sub>2</sub> (L-mal) <sub>2</sub> (bpy) (MOF-OH)                                                      | 1.20                              | 3.04                                            | 2.5                                                     | 25.0             | 29        |
| Ni <sub>2</sub> (L-asp) <sub>2</sub> (bpy)<br>(MOF-NH <sub>2</sub> )                                     | 1.40                              | 2.67                                            | 1.9                                                     | 12.5             | 29        |
| [Ni <sub>2</sub> (OH)(H <sub>2</sub> O) <sub>2</sub> Pz <sub>3</sub> ] <sub>n</sub><br>(BUT-85)          | 1.28                              | 2.95                                            | 2.3                                                     | 6.1              | 30        |
| Zn <sub>5</sub> (bbta) <sub>3</sub> F <sub>2.11</sub> Cl <sub>1.22</sub> OH <sub>0.67</sub><br>(MFU-4-F) | 3.24                              | 6.66                                            | 2.1                                                     | 6.0              | 31        |
| NUM-14a<br>([Ni(TPT)(NPC)(H <sub>2</sub> O)])                                                            | 3.70                              | 4.44                                            | 1.2                                                     | 3.3              | 32        |
| [Ca(dtztp) <sub>0.5</sub> ]                                                                              | 4.20                              | 4.90                                            | 1.2                                                     | 1.7              | 33        |
| [Ni(tzba) <sub>0.5</sub> (F)(bpy)]                                                                       | 3.79                              | 5.58                                            | 1.5                                                     | 2.2              | 34        |
| CAU-10H                                                                                                  | 2.90                              | 3.90                                            | 1.3                                                     | 2.5              | 35        |

[#] all reported conditions are under 298 K and 1 bar, equimolar selectivity.

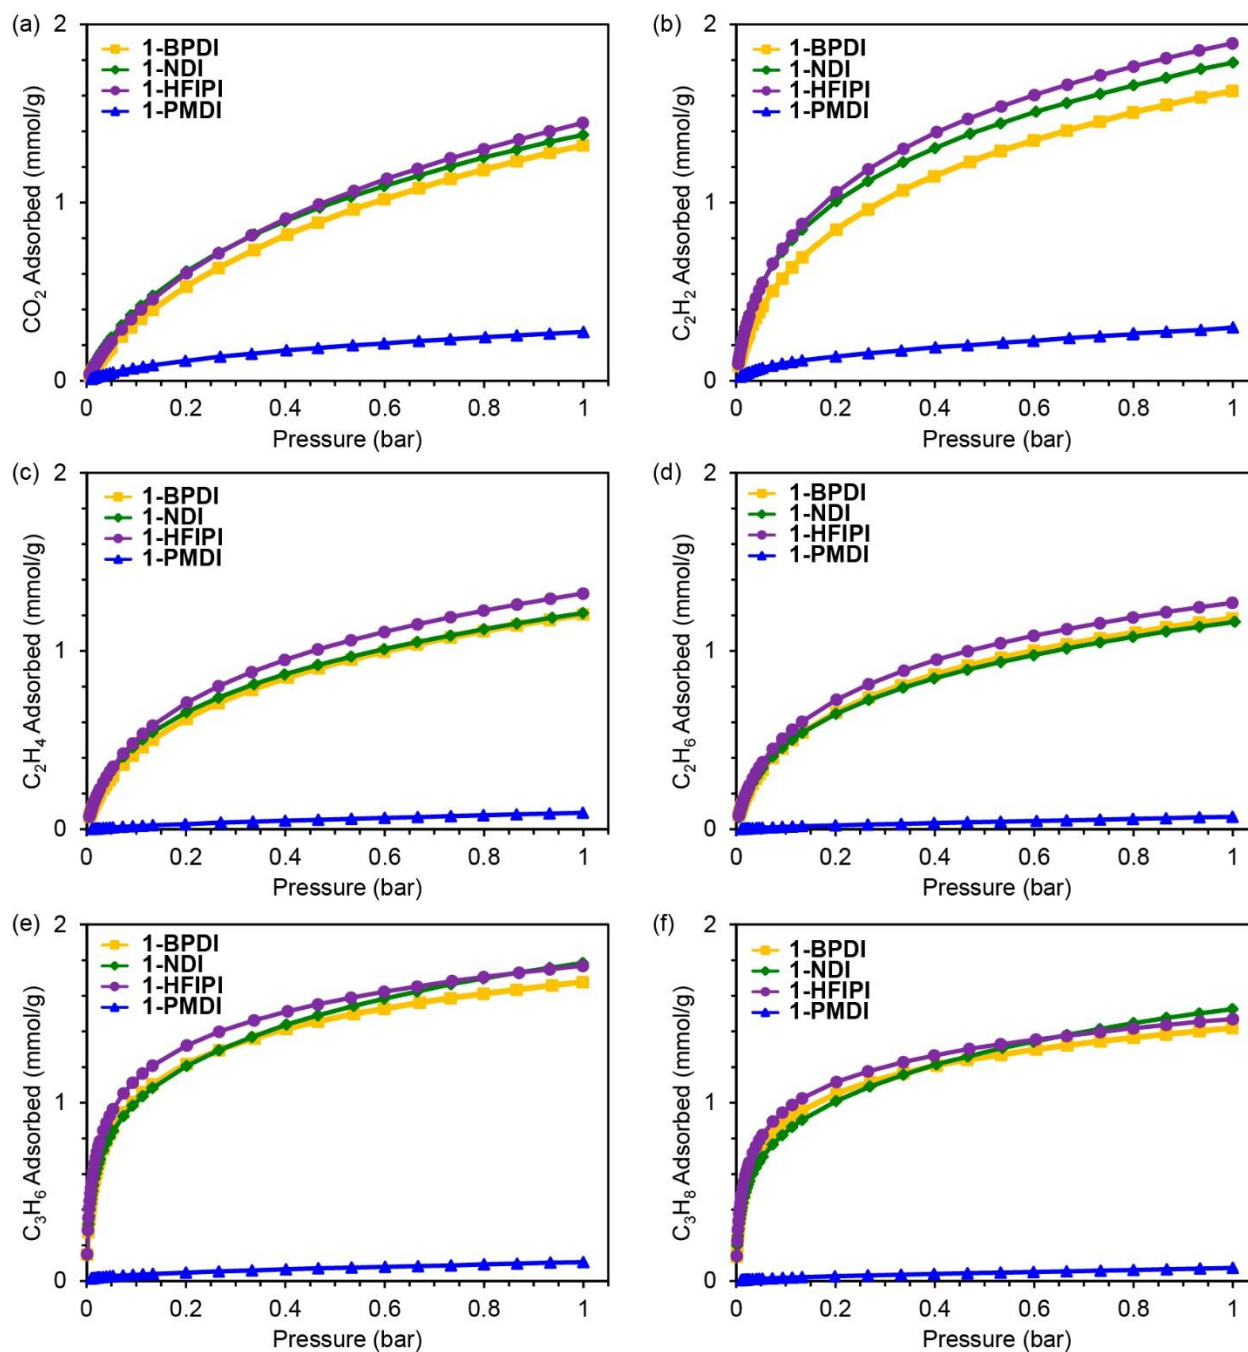

**Figure S38.** Overlays of the  $\text{CO}_2$ ,  $\text{C}_2\text{H}_2$ ,  $\text{C}_2\text{H}_4$ ,  $\text{C}_2\text{H}_6$ ,  $\text{C}_3\text{H}_6$ , and  $\text{C}_3\text{H}_8$  adsorption isotherms measured for 1-XDI materials at 300 K.

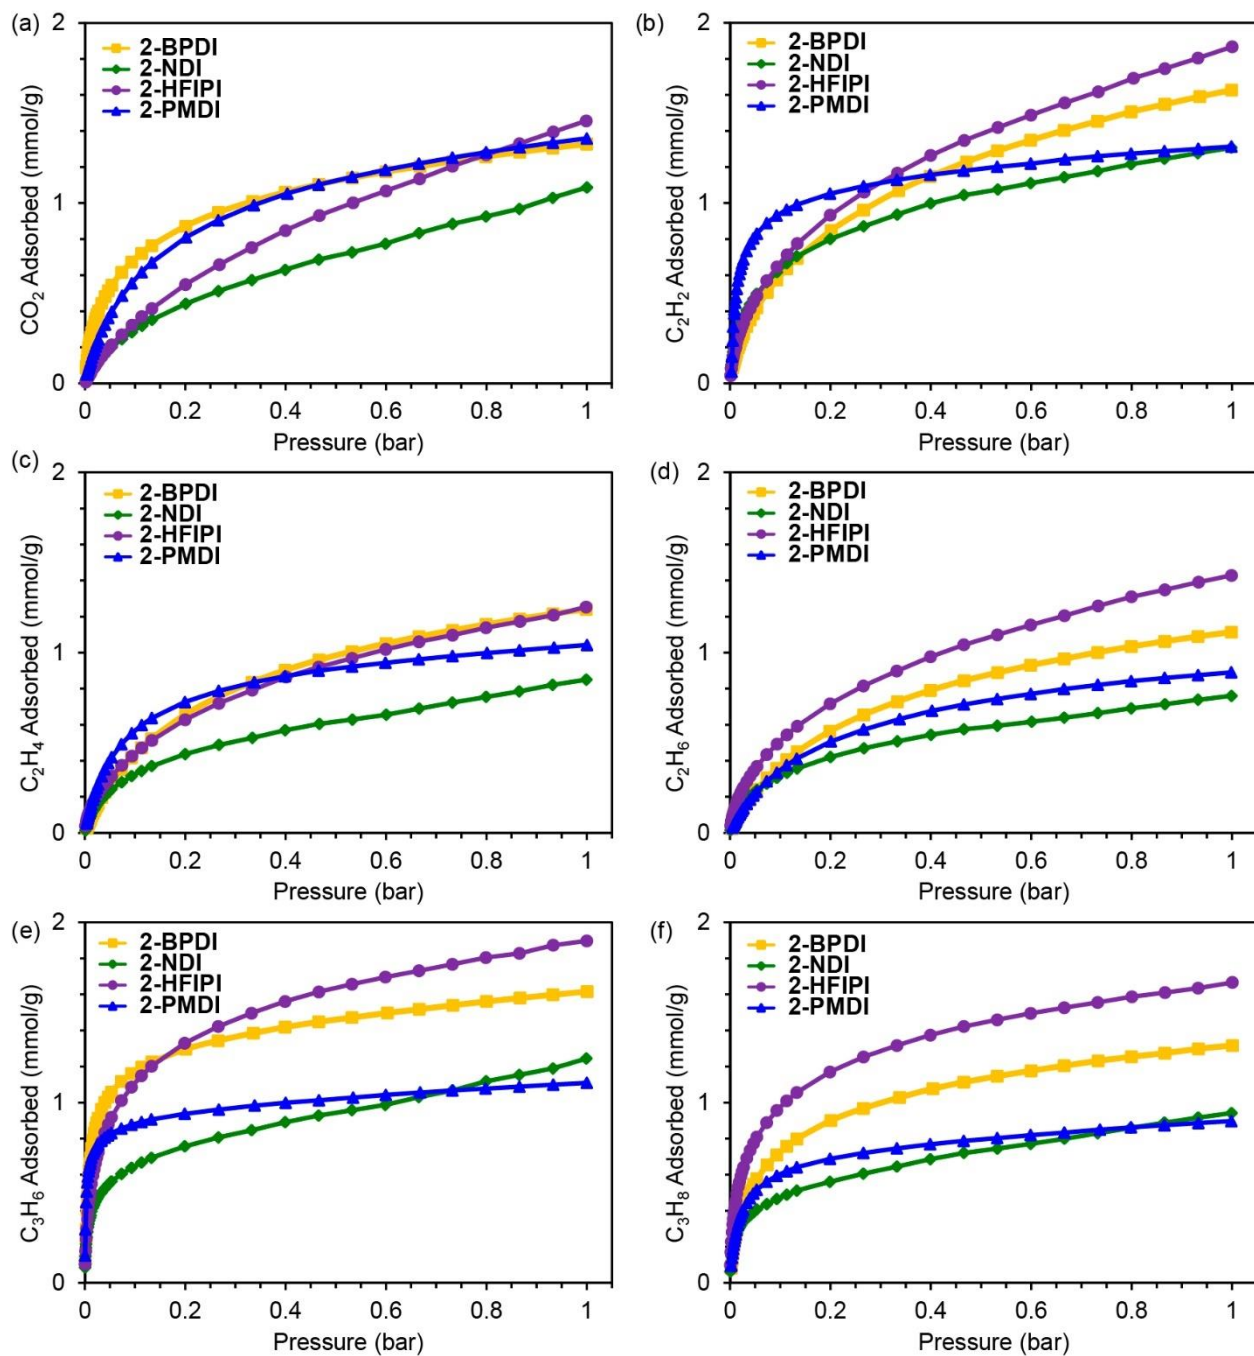

**Figure S39.** Overlays of the CO<sub>2</sub>, C<sub>2</sub>H<sub>2</sub>, C<sub>2</sub>H<sub>4</sub>, C<sub>2</sub>H<sub>6</sub>, C<sub>3</sub>H<sub>6</sub>, and C<sub>3</sub>H<sub>8</sub> adsorption isotherms measured for the 2-XDI materials at 300 K.

Variable temperature isotherms measured for **1-NDI**, **1-BPDI** and **1-HFIPI** at 300 K, 313 K and 323 K provide zero coverage enthalpy of adsorption ( $-\Delta H_{\text{ads}}$ ) values of 33.6 kJ/mol, 29.2 kJ/mol and 35.0 kJ/mol for  $\text{CO}_2$ , and 46.3 kJ/mol, 46.2 kJ/mol and 43.8 kJ/mol for  $\text{C}_2\text{H}_2$ , respectively (Figure S40-Figure S45). As expected, these values reveal a higher thermodynamic affinity for adsorption of  $\text{C}_2\text{H}_2$  over  $\text{CO}_2$ . Moreover, the similarity of the  $-\Delta H_{\text{ads}}$  values for these materials are also consistent with their similar gas adsorption profiles and IAST selectivity values.

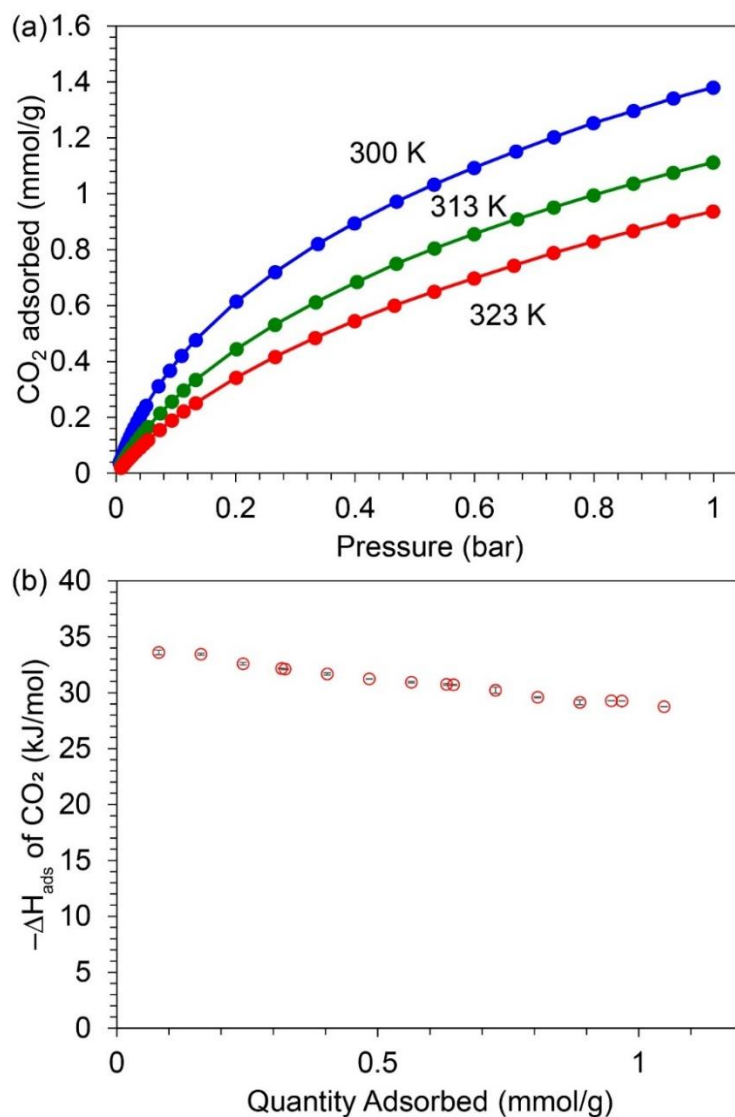

**Figure S40.** Variable temperature  $\text{CO}_2$  adsorption isotherms and isosteric heat of adsorption for **1-NDI**.

(a) Single component  $\text{CO}_2$  adsorption isotherms for **1-NDI** measured at 300 K, 313 K and 323 K. (b) The  $\text{CO}_2$  adsorption enthalpy as a function of loading calculated from the variable temperature isotherms. The error bars in (b) indicate the uncertainty of the  $-\Delta H_{\text{ads}}$  value calculated from fitting of the isosteres.

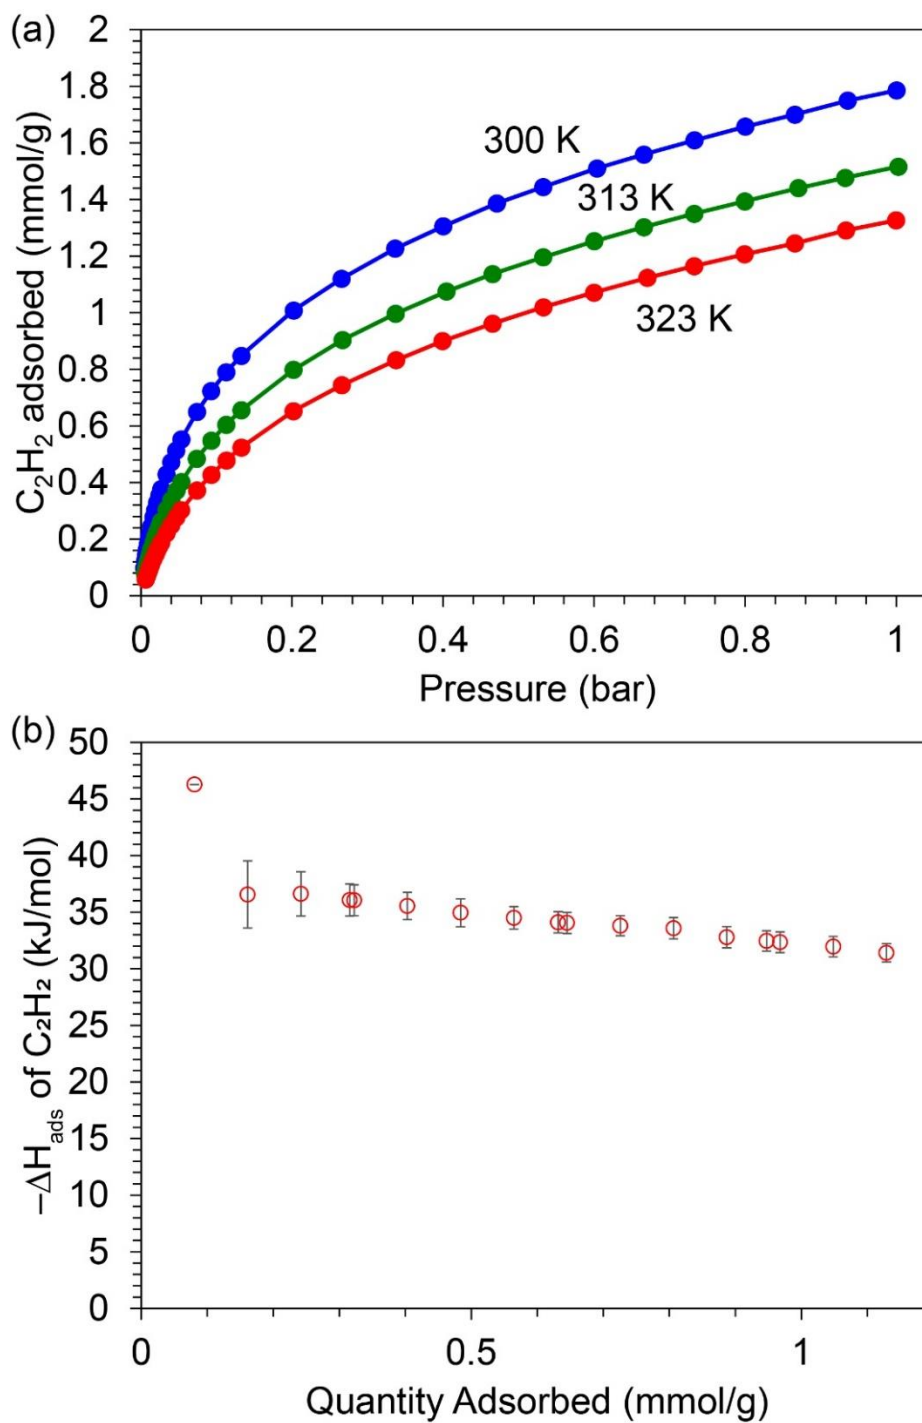

**Figure S41.** Variable temperature  $CO_2$  adsorption isotherms and isosteric heat of adsorption for **1-NDI**.

a) Single component  $C_2H_2$  adsorption isotherms for **1-NDI** measured at 300 K, 313 K and 323 K. (b) The  $C_2H_2$  adsorption enthalpy as a function of loading calculated from the variable temperature isotherms. The error bars in (b) indicate the uncertainty of the  $-\Delta H_{ads}$  value calculated from fitting of the isosteres.

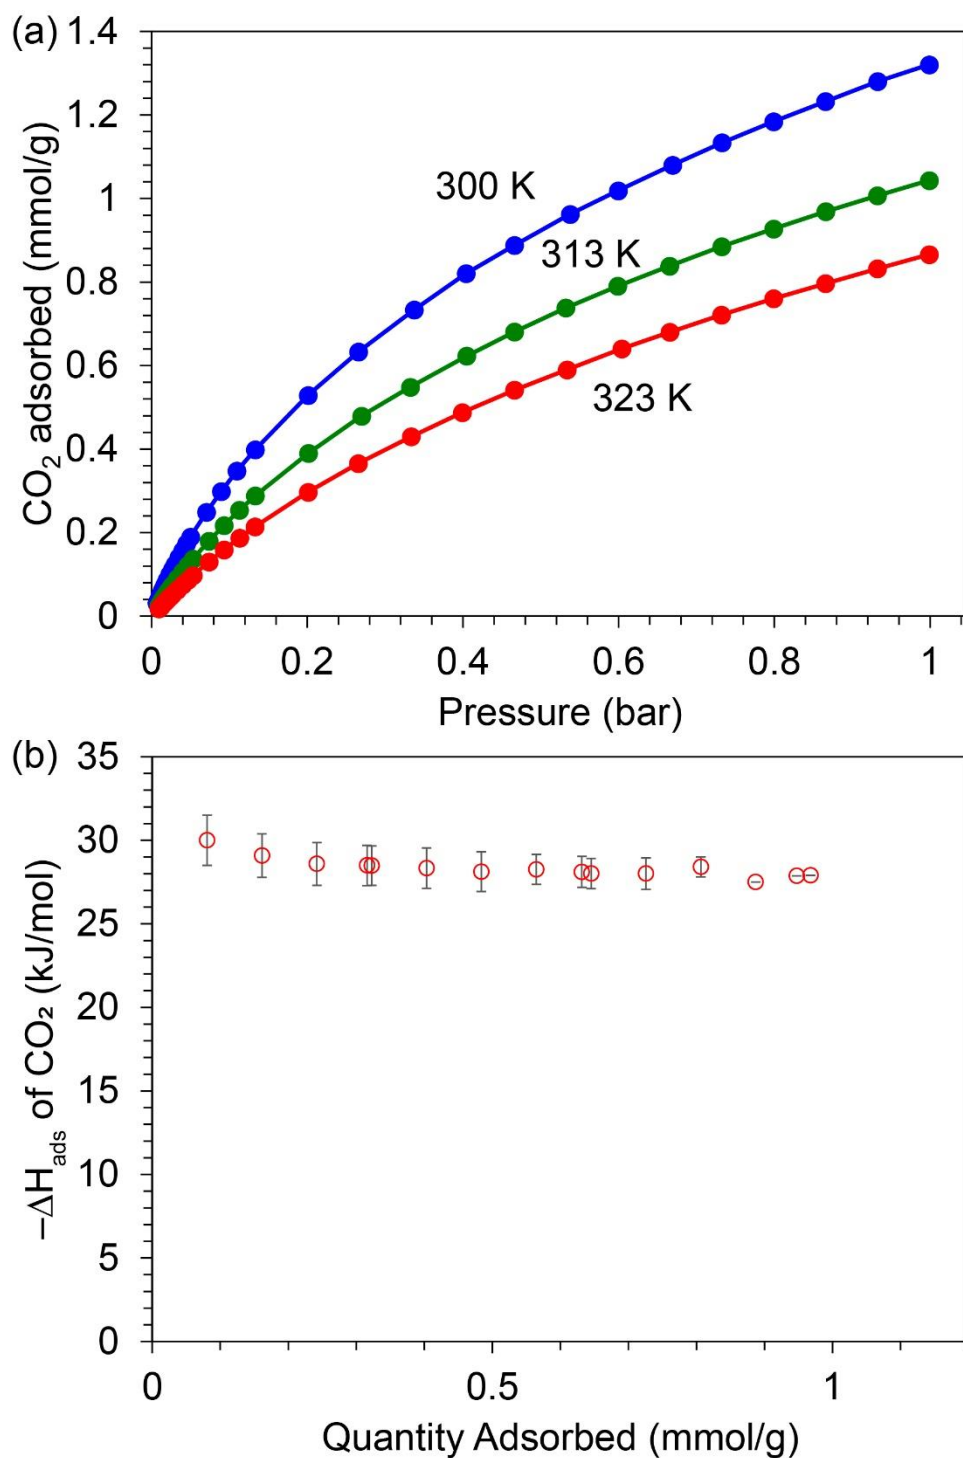

**Figure S42.** Variable temperature CO<sub>2</sub> adsorption isotherms and isosteric heat of adsorption for **1-BPDI**.

(a) Single component CO<sub>2</sub> adsorption isotherms for **1-BPDI** measured at 300 K, 313 K and 323 K. (b) The CO<sub>2</sub> adsorption enthalpy as a function of loading calculated from the variable temperature isotherms. The error bars in (b) indicate the uncertainty of the  $-\Delta H_{\text{ads}}$  value calculated from fitting of the isosteres.

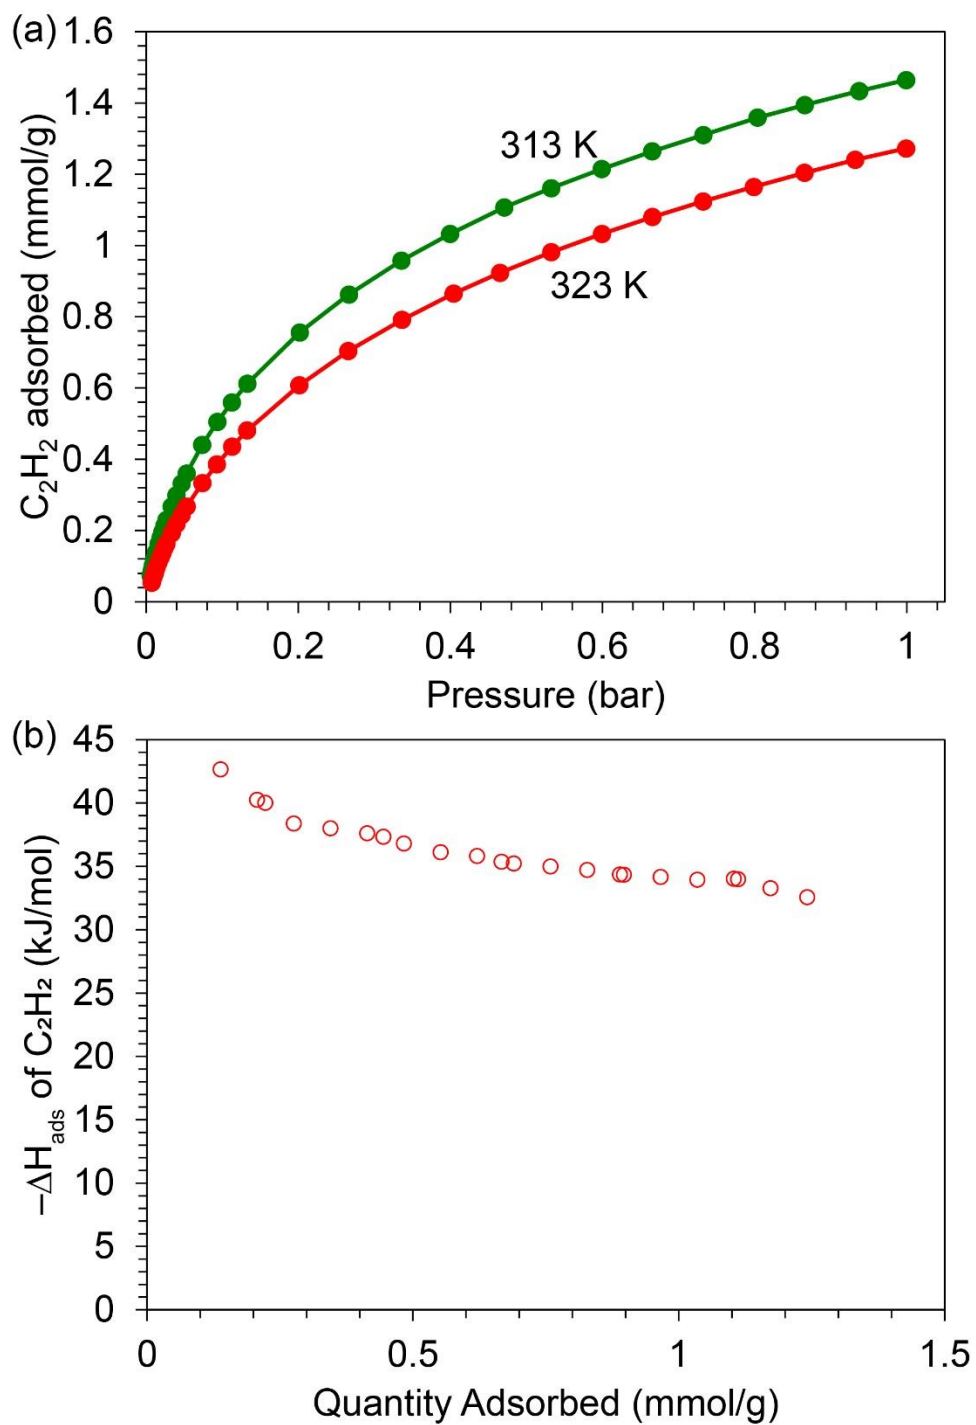

**Figure S43.** Variable temperature  $CO_2$  adsorption isotherms and isosteric heat of adsorption for **1-BPDI**.

(a) Single component  $C_2H_2$  adsorption isotherms for **1-BPDI** measured at 313 K and 323 K. (b) The  $C_2H_2$  adsorption enthalpy as a function of loading calculated from the variable temperature isotherms.

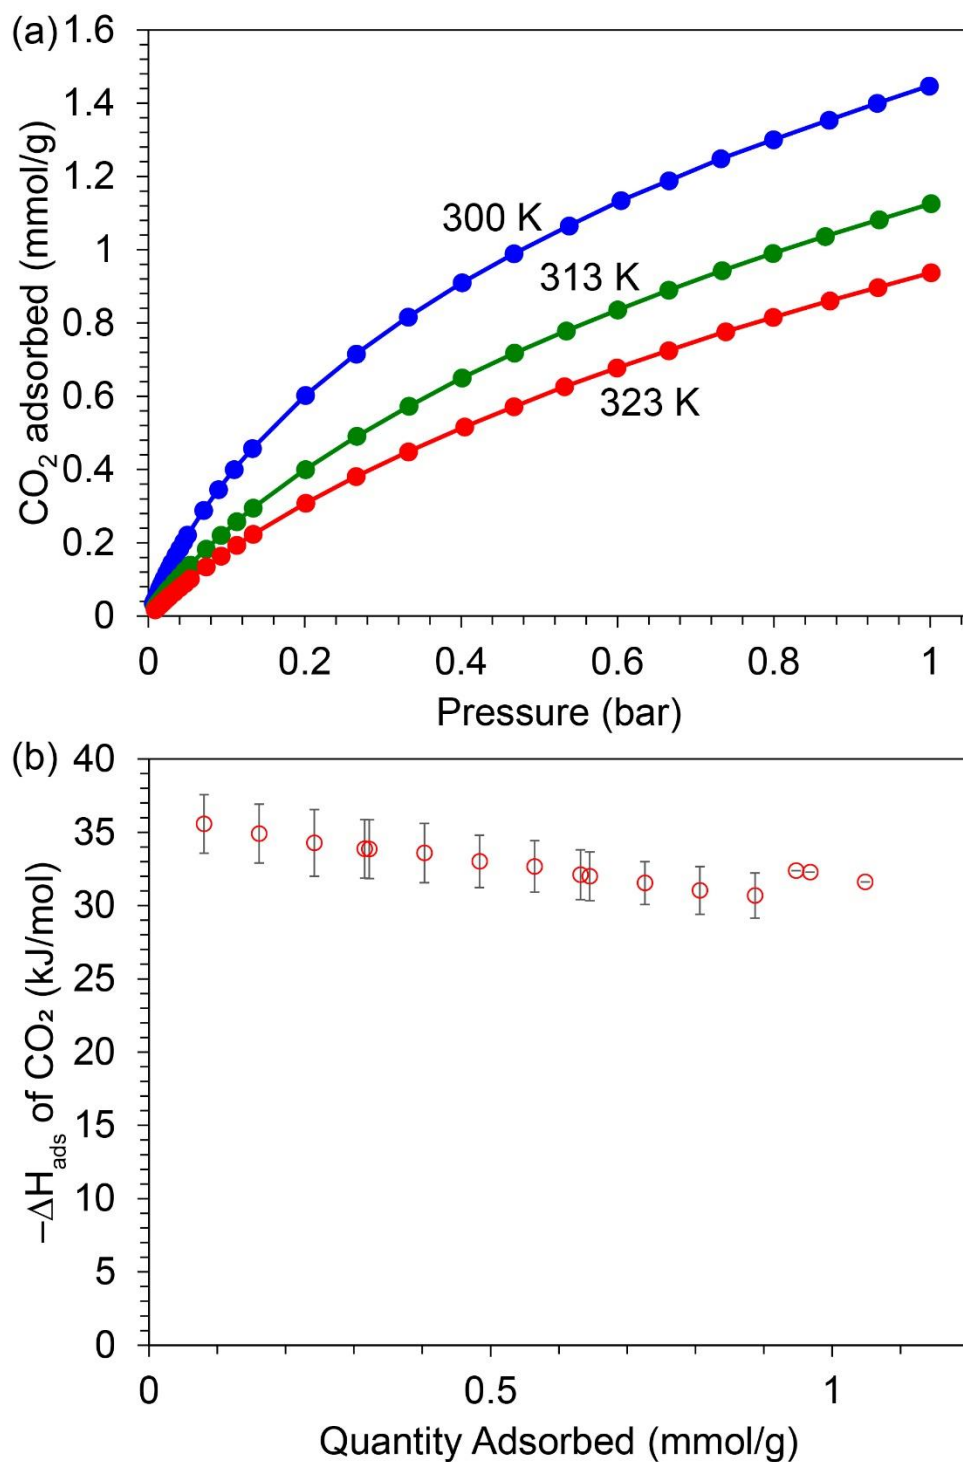

**Figure S44.** Variable temperature CO<sub>2</sub> adsorption isotherms and isosteric heat of adsorption for **1-HFIPI**.

(a) Single component CO<sub>2</sub> adsorption isotherms for **1-HFIPI** measured at 300 K, 313 K and 323 K. (b) The CO<sub>2</sub> adsorption enthalpy as a function of loading calculated from the variable temperature isotherms. The error bars in (b) indicate the uncertainty of the  $-\Delta H_{\text{ads}}$  value calculated from fitting of the isosteres.



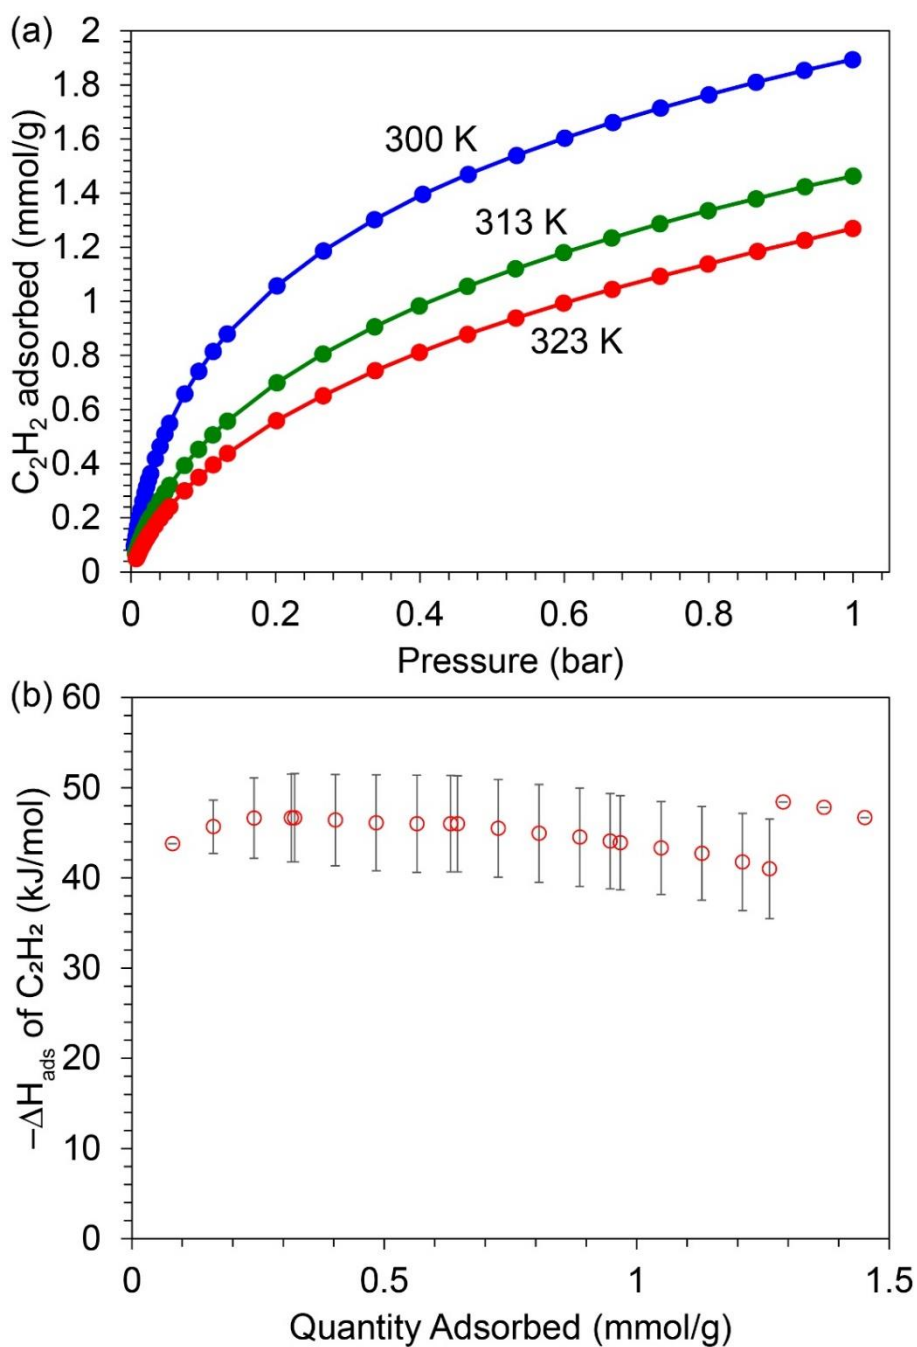

**Figure S45.** Variable temperature  $CO_2$  adsorption isotherms and isosteric heat of adsorption for **1-HFIPI**.

(a) Single component  $C_2H_2$  adsorption isotherms for **1-HFIPI** measured at 300 K, 313 K and 323 K. (b) The  $C_2H_2$  adsorption enthalpy as a function of loading calculated from the variable temperature isotherms. The error bars in (b) indicate the uncertainty of the  $-\Delta H_{ads}$  value calculated from fitting of the isosteres.

## References

- 1 W. Rong-Jia, Z. Hou-Gan, Z. Zhi-Yin, N. Guo-Hong and L. Dan, *CCS Chem.*, 2020, **3**, 2045–2053.
- 2 X. Li, J. Wang, F. Xue, Y. Wu, H. Xu, T. Yi and Q. Li, *Angew. Chem. Int. Ed.*, 2021, **60**, 2534–2540.
- 3 H.-G. Zhou, R.-Q. Xia, J. Zheng, D. Yuan, G.-H. Ning and D. Li, *Chem. Sci.*, 2021, **12**, 6280–6286.
- 4 H.-S. Lu, W.-K. Han, X. Yan, C.-J. Chen, T. Niu and Z.-G. Gu, *Angew. Chem. Int. Ed.*, 2021, **60**, 17881–17886.
- 5 H. L. Nguyen, F. Gándara, H. Furukawa, T. L. H. Doan, K. E. Cordova and O. M. Yaghi, *J. Am. Chem. Soc.*, 2016, **138**, 4330–4333.
- 6 S. K. Elsaidi, M. H. Mohamed, J. S. Loring, B. P. McGrail and P. K. Thallapally, *ACS Appl. Mater. Interfaces*, 2016, **8**, 28424–28427.
- 7 L. Sun, M. Lu, Z. Yang, Z. Yu, X. Su, Y.-Q. Lan and L. Chen, *Angew. Chem. Int. Ed.*, 2022, **61**, e202204326.
- 8 W.-K. Han, Y. Liu, X. Yan, Y. Jiang, J. Zhang and Z.-G. Gu, *Angew. Chem. Int. Ed.*, 2022, **61**, e202208791.
- 9 R. Jangir, A. C. Kalita, D. Kaleeswaran, S. K. Gupta and R. Murugavel, *Chem. Eur. J.*, 2018, **24**, 6178–6190.
- 10 J. Yan, B. Zhang and Z. Wang, *ACS Appl. Mater. Interfaces*, 2018, **10**, 26618–26627.
- 11 G. Li and Z. Wang, *J. Phys. Chem. C*, 2013, **117**, 24428–24437.
- 12 G. Li and Z. Wang, *Macromolecules*, 2013, **46**, 3058–3066.
- 13 E. Rangel Rangel, E. M. Maya, F. Sánchez, J. de Abajo and J. G. de la Campa, *J. Memb. Sci.*, 2013, **447**, 403–412.
- 14 D. Kołbuk, M. Ciechomska, O. Jeznach and P. Sajkiewicz, *RSC Adv.*, 2022, **12**, 4016–4028.
- 15 B. R. Reiner, B. M. Foxman and C. R. Wade, *Dalton Trans.*, 2017, **46**, 9472–9480.
- 16 S. Biswas, M. Grzywa, H. P. Nayek, S. Dehnen, I. Senkovska, S. Kaskel and D. Volkmer, *Dalton Trans.*, 2009, **9226**, 6487–6495.
- 17 D. Denysenko, M. Grzywa, M. Tonigold, B. Streppel, I. Krkljus, M. Hirscher, E. Mugnaioli, U. Kolb, J. Hanss and D. Volkmer, *Chem. Eur. J.*, 2011, **17**, 1837–1848.
- 18 P. Schmieder, M. Grzywa, D. Denysenko, M. Hambach and D. Volkmer, *Dalton Trans.*, 2015, **44**, 13060–13070.
- 19 Q. Liu, N. Hoefler, G. Berkbigger, Z. Cui, T. Liu, A. C. Co, D. W. McComb and C. R. Wade, *Inorg. Chem.*, 2022, **61**, 18710–18718.
- 20 Z. Chang, R.-B. Lin, Y. Ye, C. Duan and B. Chen, *J. Mater. Chem. A*, 2019, **7**, 25567–25572.
- 21 Y. Wang, N.-Y. Huang, X.-W. Zhang, H. He, R.-K. Huang, Z.-M. Ye, Y. Li, D.-D. Zhou, P.-Q. Liao, X.-M. Chen and J.-P. Zhang, *Angew. Chem. Int. Ed.*, 2019, **58**, 7692–7696.
- 22 Y. Xie, Y. Shi, H. Cui, R.-B. Lin and B. Chen, *Small Struct.*, 2022, **3**, 2100125.
- 23 D.-L. Chen, H. Shang, W. Zhu and R. Krishna, *Chem. Eng. Sci.*, 2014, **117**, 407–415.
- 24 J. E. Bachman, M. T. Kapelewski, D. A. Reed, M. I. Gonzalez and J. R. Long, *J. Am. Chem. Soc.*, 2017, **139**, 15363–15370.

- 25 B. Liang, X. Zhang, Y. Xie, R.-B. Lin, R. Krishna, H. Cui, Z. Li, Y. Shi, H. Wu, W. Zhou and B. Chen, *J. Am. Chem. Soc.*, 2020, **142**, 17795–17801.
- 26 Y. Xie, Y. Shi, E. M. Cedeño Morales, A. El Karch, B. Wang, H. Arman, K. Tan and B. Chen, *J. Am. Chem. Soc.*, 2023, **145**, 2386–2394.
- 27 L. Zhang, K. Jiang, L. Yang, L. Li, E. Hu, L. Yang, K. Shao, H. Xing, Y. Cui, Y. Yang, B. Li, B. Chen and G. Qian, *Angew. Chem. Int. Ed.*, 2021, **60**, 15995–16002.
- 28 Z. Niu, X. Cui, T. Pham, G. Verma, P. C. Lan, C. Shan, H. Xing, K. A. Forrest, S. Suepaul, B. Space, A. Nafady, A. M. Al-Enizi and S. Ma, *Angew. Chem. Int. Ed.*, 2021, **60**, 5283–5288.
- 29 W. Gong, H. Cui, Y. Xie, Y. Li, X. Tang, Y. Liu, Y. Cui and B. Chen, *J. Am. Chem. Soc.*, 2021, **143**, 14869–14876.
- 30 G.-R. Si, W. Wu, T. He, Z.-C. Xu, K. Wang and J.-R. Li, *ACS Mater. Lett.*, 2022, **4**, 1032–1036.
- 31 Q. Liu, S. G. Cho, J. Hilliard, T.-Y. Wang, S.-C. Chien, L.-C. Lin, A. C. Co and C. R. Wade, *Angew. Chem. Int. Ed.*, 2023, **62**, e202218854.
- 32 Q. Zhang, G.-N. Han, X. Lian, S.-Q. Yang and T.-L. Hu, *Molecules*, 2022, **27**, 5929–5939.
- 33 G.-D. Wang, Y.-Z. Li, W.-F. Zhang, L. Hou, Y.-Y. Wang and Z. Zhu, *ACS Appl. Mater. Interfaces*, 2021, **13**, 58862–58870.
- 34 G.-D. Wang, H.-H. Wang, W.-J. Shi, L. Hou, Y.-Y. Wang and Z. Zhu, *J. Mater. Chem. A*, 2021, **9**, 24495–24502.
- 35 Y. Ye, S. Xian, H. Cui, K. Tan, L. Gong, B. Liang, T. Pham, H. Pandey, R. Krishna, P. C. Lan, K. A. Forrest, B. Space, T. Thonhauser, J. Li and S. Ma, *J. Am. Chem. Soc.*, 2022, **144**, 1681–1689.
